# Supplementary material for: MCL1 Is Required for Maintenance of Intestinal Homeostasis and Prevention of Carcinogenesis in Mice
Source: PubMed Central journal article supplement — Gastroenterology. 2020 Jul;159(1):183–99. doi: 10.1053/j.gastro.2020.03.017 (PMC7397524; doi:10.1053/j.gastro.2020.03.017), 2020-07
Supplement: mmc1.pdf [file mmc1.pdf]

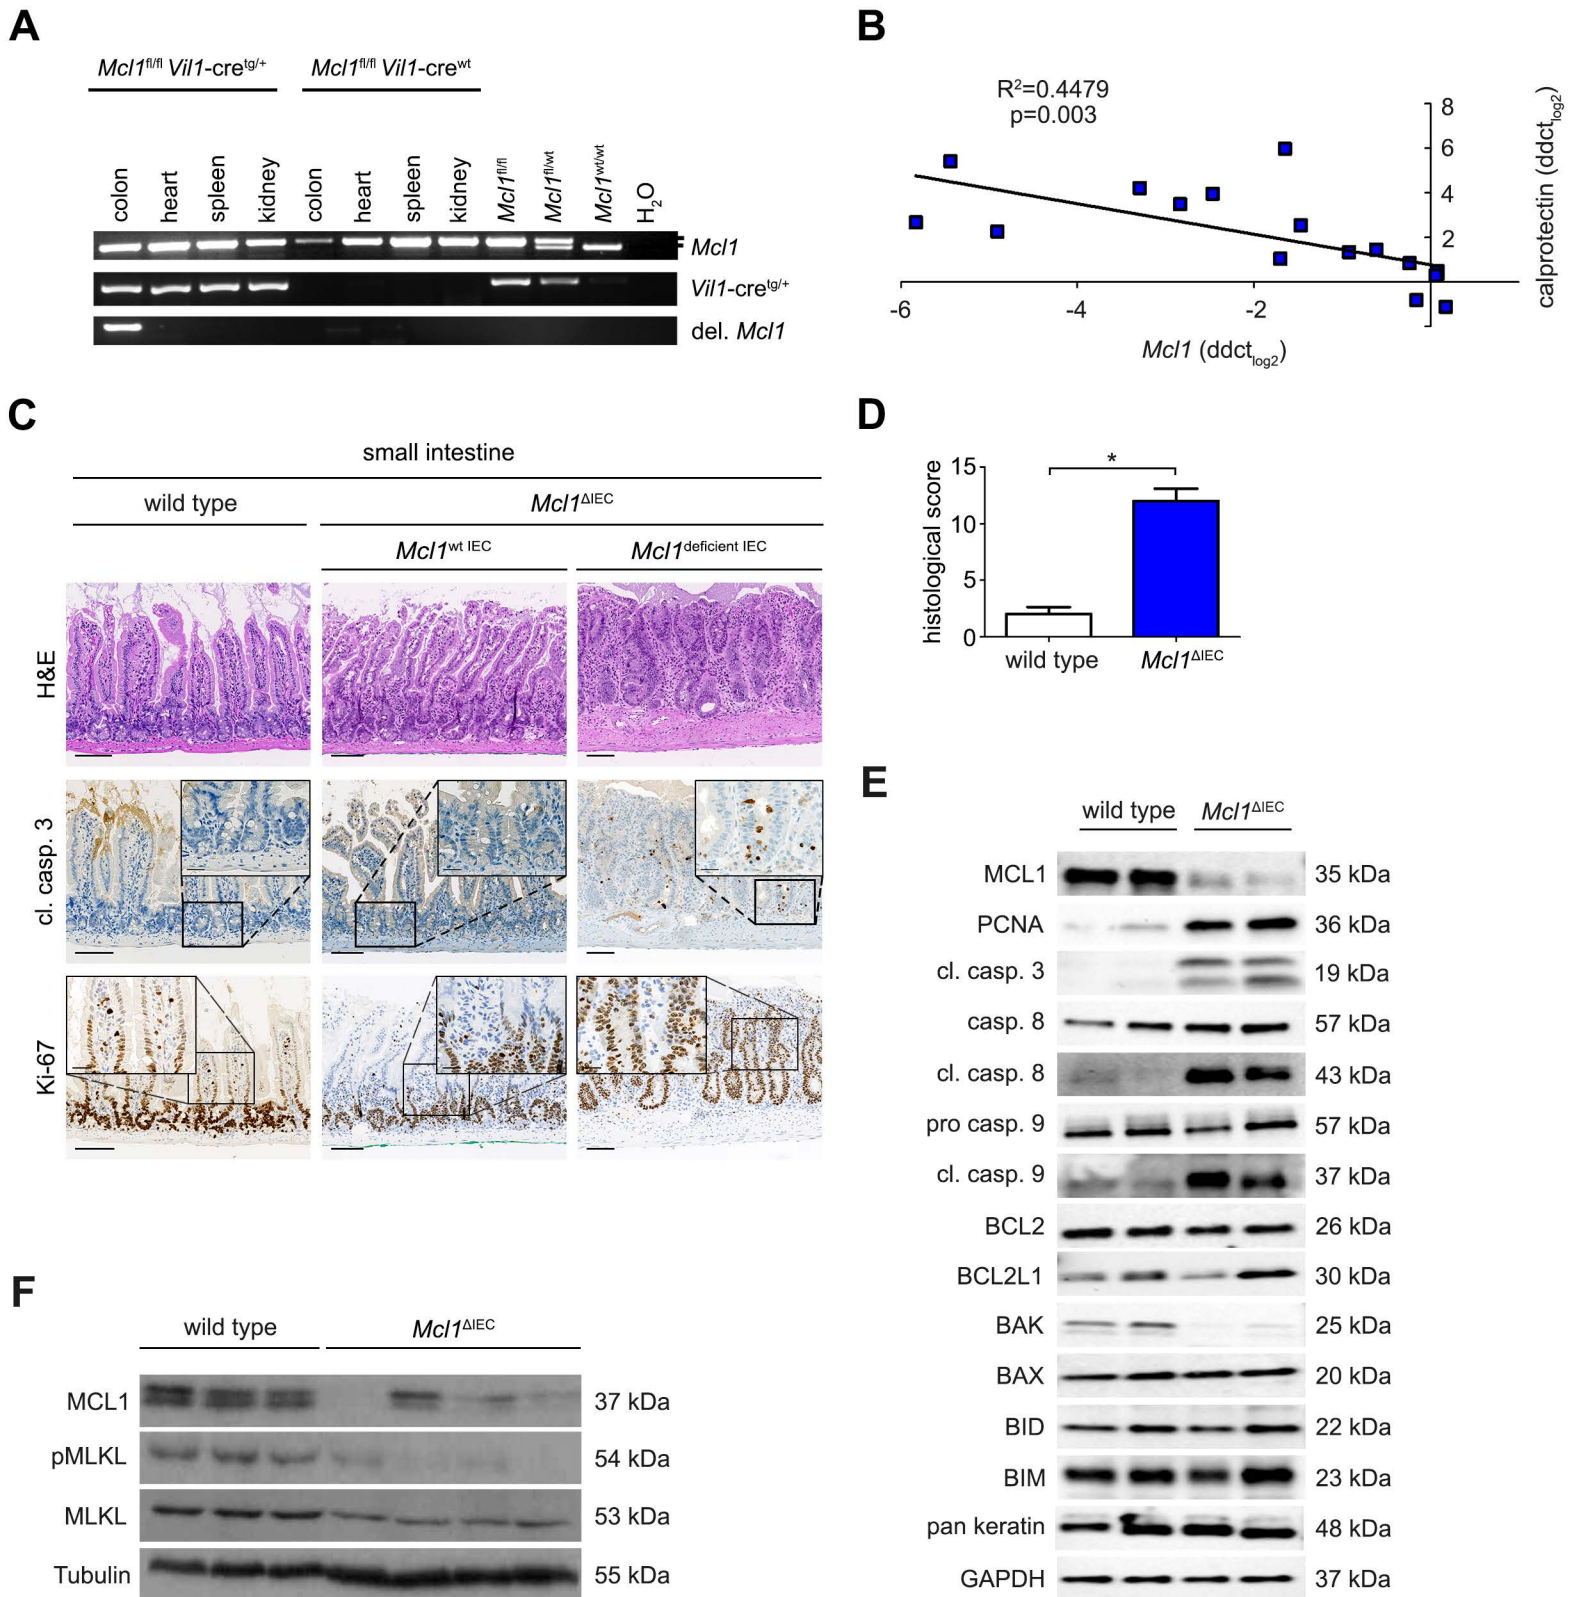

Figure S1. Healy\*, Boege\*, Hodder\* et al.

1 **Figure S1: Characterisation of *Mcl1*<sup>ΔIEC</sup> mice.** (A) Tissue specific PCR illustrating *Mcl1*  
2 deletion is specific to the intestine of *Mcl1*<sup>fl/fl</sup> *Vil1*-cre<sup>tg/wt</sup> (*Mcl1*<sup>ΔIEC</sup>) mice and not *Mcl1*<sup>fl/fl</sup> *Vil1*-  
3 cre<sup>wt/wt</sup> (wild type) mice. (B) Real time PCR from whole colon tissue homogenates  
4 demonstrates that levels of calprotectin were inversely correlated to levels of *Mcl1* expression  
5 within 2-month-old *Mcl1*<sup>ΔIEC</sup> mice (n=15). (C) Representative images from the small intestine  
6 of 2-month-old wild type control mice compared with *Mcl1*<sup>ΔIEC</sup> littermate mice showing impaired  
7 intestinal architecture (H&E), increased IEC apoptosis (cl. casp. 3), and hyperproliferation (Ki-  
8 67) (scale bars: 100μm, 25μm for inserts). (D) Blinded histological scoring showing increased  
9 histological score in the small intestine of 2-month-old *Mcl1*<sup>ΔIEC</sup> mice compared with wild type  
10 control mice (n=5). (E) Representative images of western blot analysis from IEC isolated from  
11 2-month-old wild type and *Mcl1*<sup>ΔIEC</sup> mice and analysed for markers of proliferation, apoptosis,  
12 as well as other BCL2 family members. (F) Representative images from western blot analysis  
13 showing no evidence of increased expression of the necroptosis markers MLKL or pMLKL in  
14 IEC isolated from 2-month-old *Mcl1*<sup>ΔIEC</sup> mice suggesting that IEC death observed in *Mcl1*<sup>ΔIEC</sup>  
15 mice is mediated through apoptosis rather than necroptosis. Tubulin was used as a loading  
16 control. Data presented as either bar charts or scatter plot graph show mean values ± s.e.m.  
17 Statistical analysis was conducted by Mann-Whitney test (D) where \*  $p \leq 0.05$ .

18

19

20

21

22

23

24

25

**A**

colon

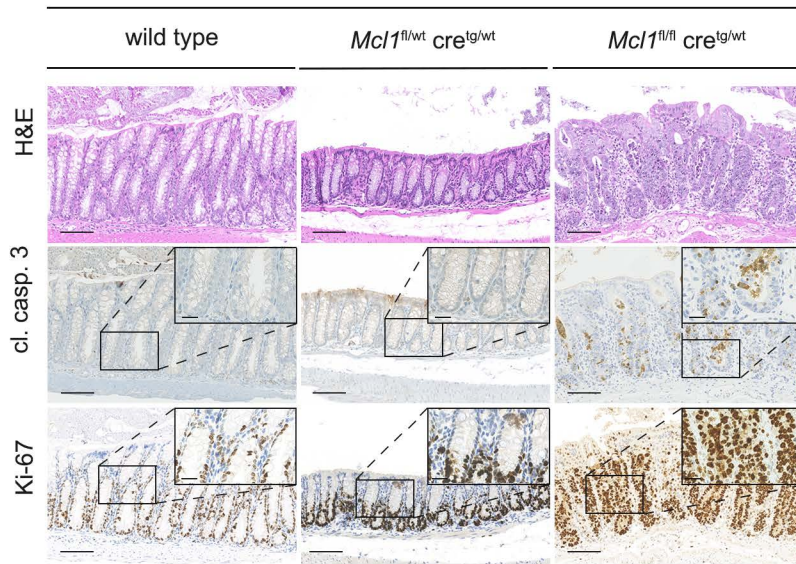**B**

small intestine

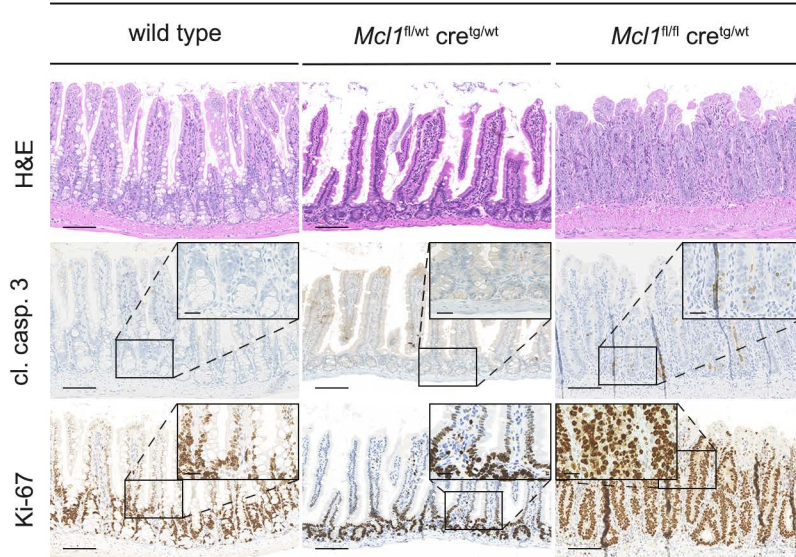

26 **Figure S2: *Mcl1*<sup>fl/wt</sup> *cre*<sup>tg/wt</sup> mice morphologically resemble wild type control mice.** (A)  
27 Representative images from the colon of 2-month-old *Mcl1*<sup>fl/wt</sup> *cre*<sup>tg/wt</sup> control mice compared  
28 with wild type control and *Mcl1*<sup>ΔIEC</sup> (*Mcl1*<sup>fl/fl</sup> *cre*<sup>tg/wt</sup>) littermates showing normal intestinal  
29 architecture (H&E), no basal IEC apoptosis (cl. casp. 3), and normal levels of proliferation (Ki-  
30 67) (scale bars: 100μm, 25μm for inserts). (B) Representative images from the small intestine  
31 of 2-month-old *Mcl1*<sup>fl/wt</sup> *cre*<sup>tg/wt</sup> control mice compared with wild type control and *Mcl1*<sup>ΔIEC</sup> (*Mcl1*<sup>fl/fl</sup>  
32 *cre*<sup>tg/wt</sup>) littermates showing normal intestinal architecture (H&E), no basal IEC apoptosis (cl.  
33 casp. 3), and normal levels of proliferation (Ki-67) (scale bars: 100μm, 25μm for inserts).

34

35

36

37

38

39

40

41

42

43

44

45

46

47

48



**A**

colon

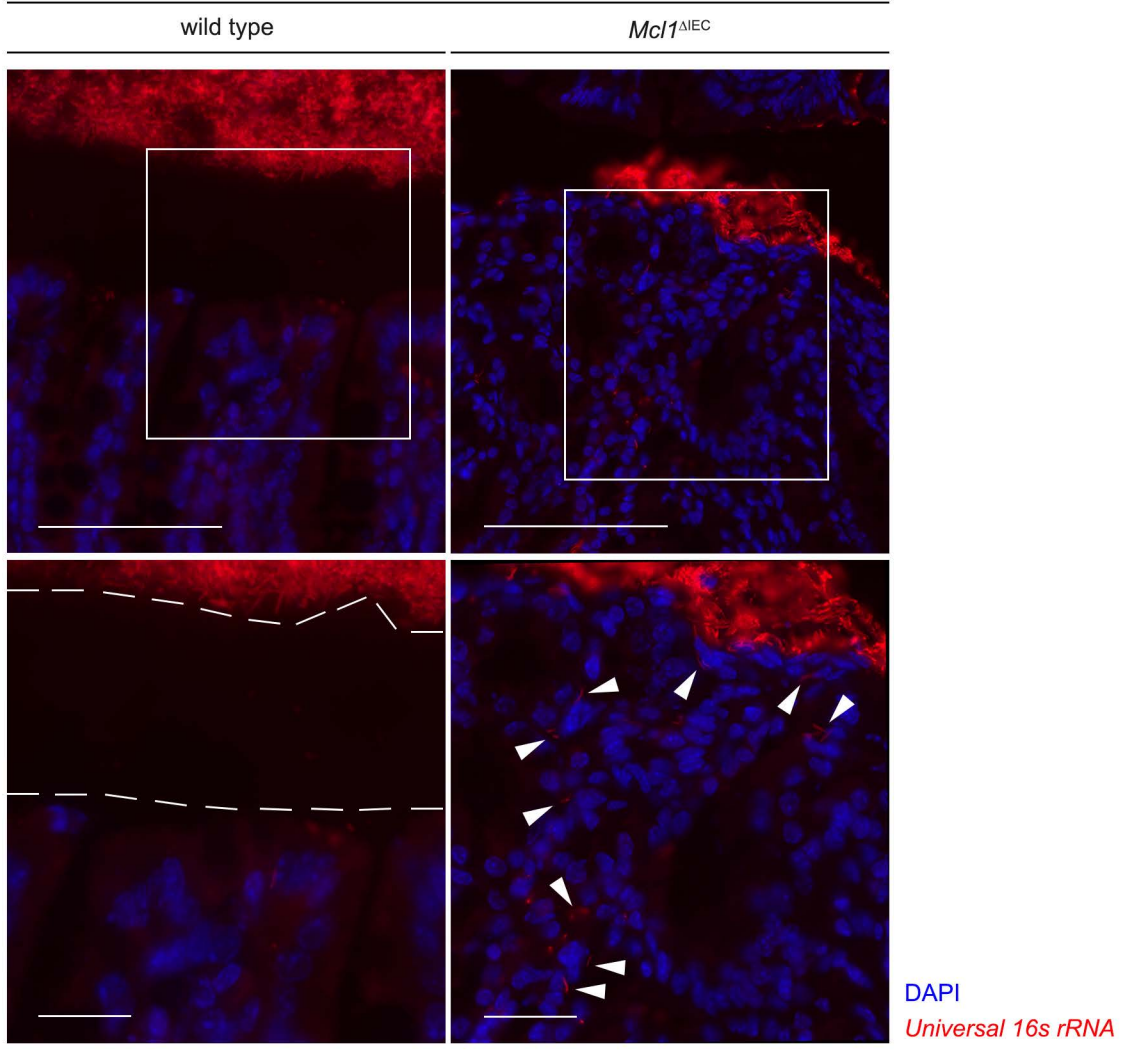

Figure S3. Healy\*, Boege\*, Hodder\* et al.

49 **Figure S3: Characterisation of *Mcl1*<sup>ΔIEC</sup> mice.** (A) Representative images from FISH analysis  
50 illustrating *Universal Bacterial 16S* rRNA staining (red) in colon of 2-month-old wild type and  
51 *Mcl1*<sup>ΔIEC</sup> mice. Dashed lines illustrate the sterile mucosal barrier (intact in wild type mice)  
52 preventing bacteria from entering the mucosa. This protective mucosal layer is lost in *Mcl1*<sup>ΔIEC</sup>  
53 mice. White arrowheads illustrate bacteria that have translocated from the lumen to the  
54 mucosal layer via the impaired epithelial barrier in *Mcl1*<sup>ΔIEC</sup> mice (scale bars: 100μm scale for  
55 top images, 25μm scale for bottom images).

56

57

58

59

60

61

62

63

64

65

66

67

68

69

70

71

**A**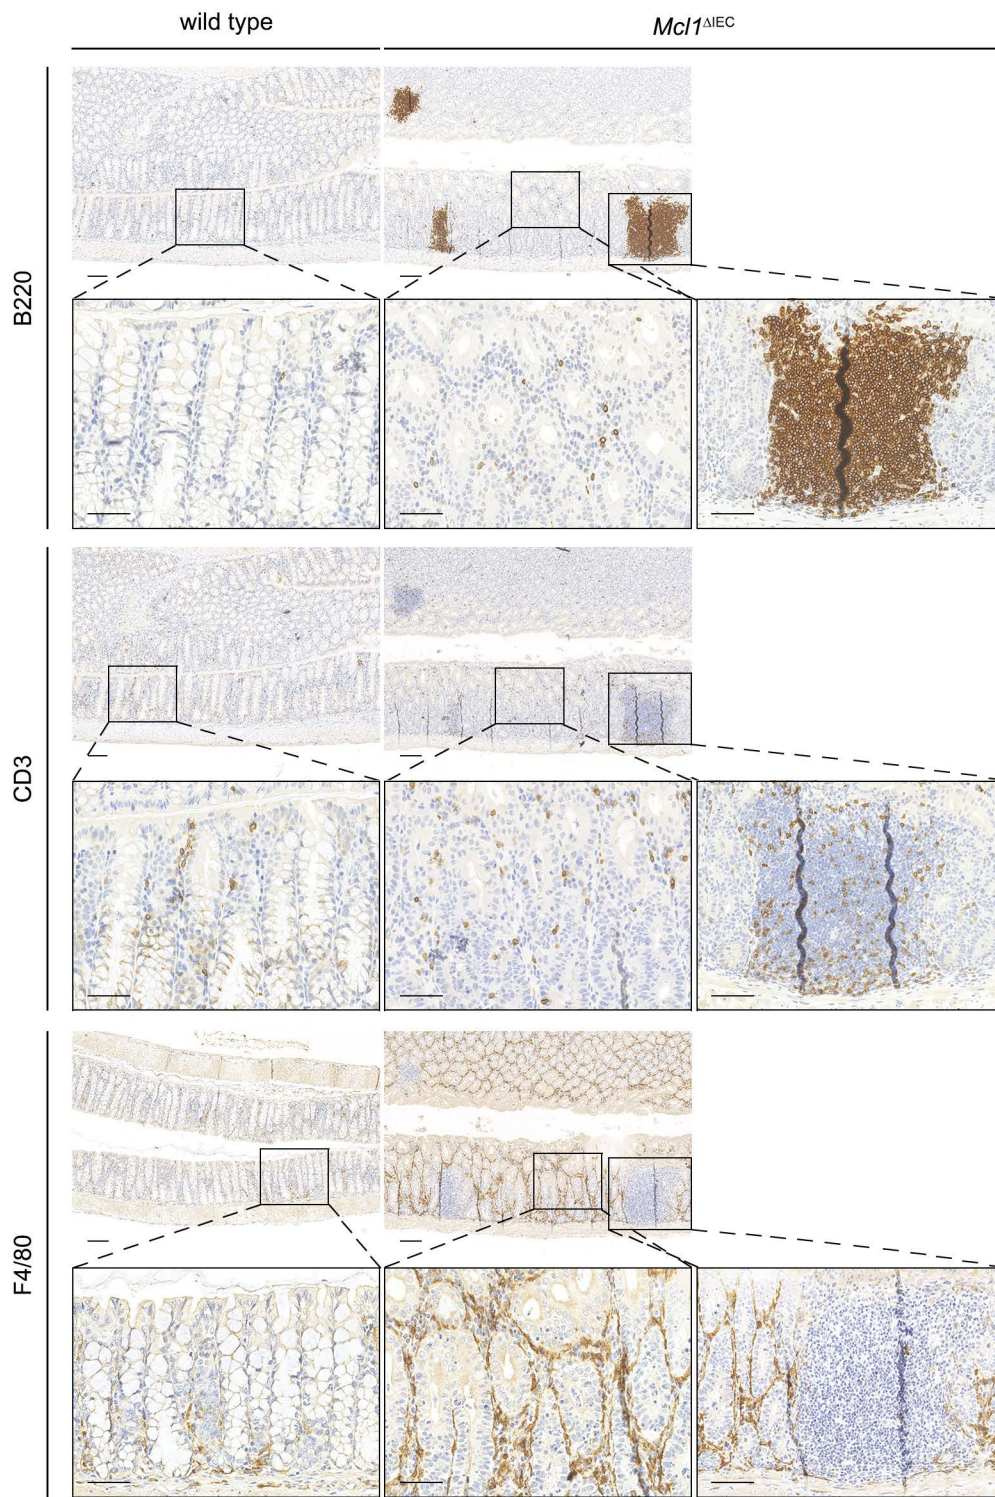**B**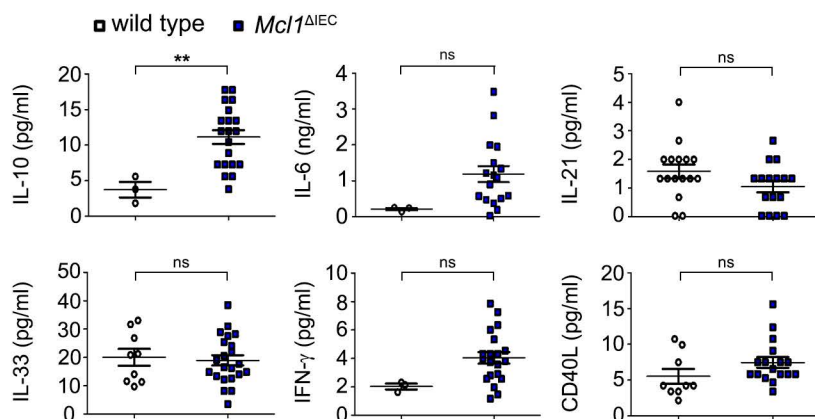

Figure S4. Healy\*, Boege\*, Hodder\* et al.

72 **Figure S4: Characterisation of *Mcl1*<sup>ΔIEC</sup> mice.** (A) Immunohistochemical characterisation of  
73 lymphocyte infiltrates in the colon of 2-month-old wild type control mice compared with *Mcl1*<sup>ΔIEC</sup>  
74 littermates showing increased B cells (B220), T cells (CD3) and macrophages (F4/80) in  
75 *Mcl1*<sup>ΔIEC</sup> mice. High magnification images show infiltrating immune cells within the lamina  
76 propria or lymphoid follicles that were present throughout the small intestine and colon of  
77 *Mcl1*<sup>ΔIEC</sup> mice (scale bars: 100μm for lower magnification, 50μm for higher magnification  
78 images). (B) Ex vivo colon cultures established from 2-month-old mice and analysed for IL-10,  
79 IL-6, IL-21, IL-33, IFN-γ and CD40L expression using multiplex analysis (minimum n=10 per  
80 group). Data presented as scatter plot graphs show individual data points ± s.e.m. Statistical  
81 analysis was conducted by one-way ANOVA with Bonferroni correction (B) where \*\*  $p \leq 0.01$ .

82

83

84

85

86

87

88

89

90

91

92

93

94



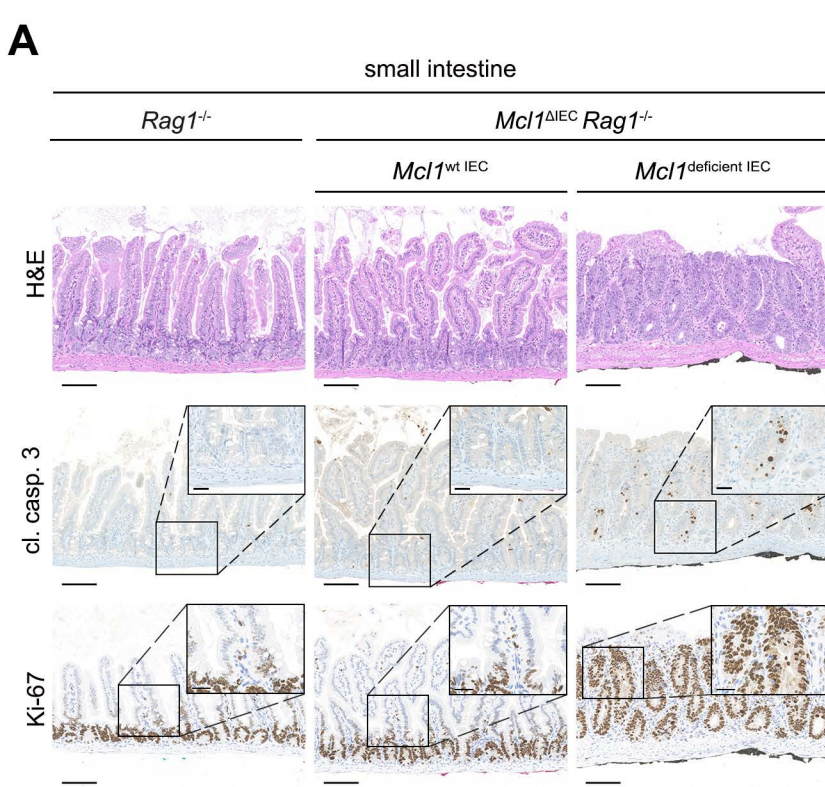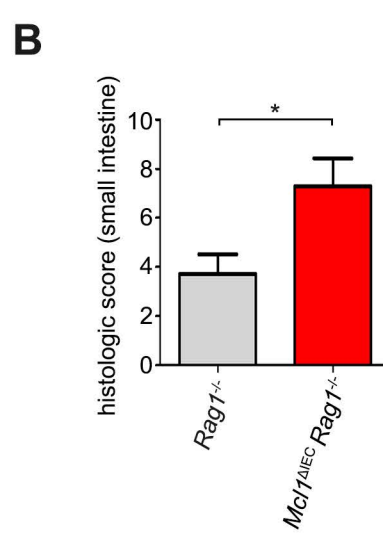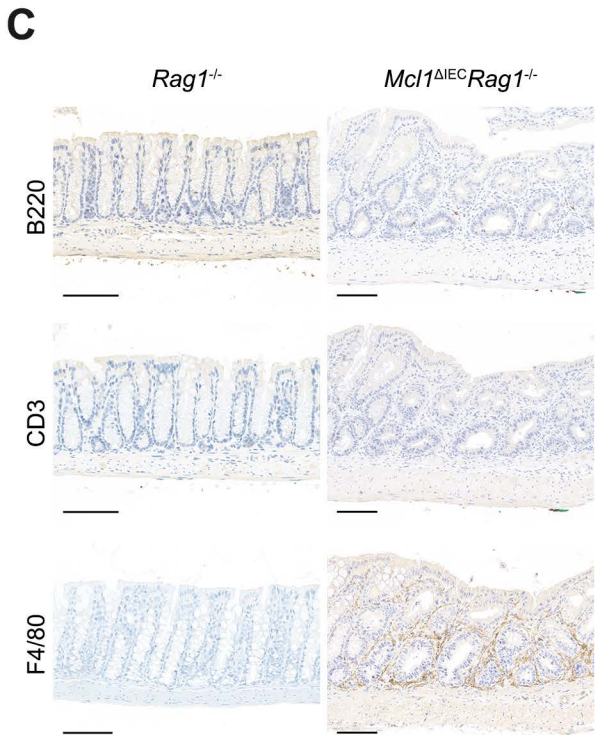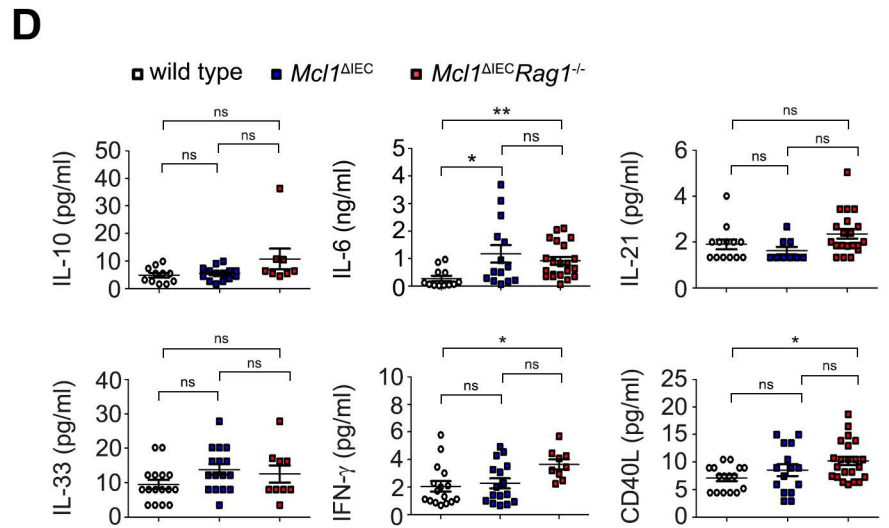

95 **Figure S5: Inflammation in *Mcl1*<sup>ΔIEC</sup> mice is independent of T and B cells.** (A)  
96 Representative images from the small intestine from 2-month-old *Rag1*<sup>-/-</sup> control mice  
97 compared with age-matched *Mcl1*<sup>ΔIEC</sup>*Rag1*<sup>-/-</sup> mice illustrating impaired intestinal architecture  
98 (H&E), increased IEC apoptosis (cl. casp. 3) and hyperproliferation (Ki-67) (scale bars: 100μm,  
99 25μm for inserts). (B) Blinded histological score of small intestine samples from 2-month-old  
100 *Mcl1*<sup>ΔIEC</sup>*Rag1*<sup>-/-</sup> mice compared with age-matched *Rag1*<sup>-/-</sup> control mice show significantly  
101 increased pathology in *Mcl1*<sup>ΔIEC</sup>*Rag1*<sup>-/-</sup> mice (n=5). (C) 2-month-old *Rag1*<sup>-/-</sup> control mice and  
102 age-matched *Mcl1*<sup>ΔIEC</sup>*Rag1*<sup>-/-</sup> mice were stained for B cell (B220), T cell (CD3) and  
103 macrophage (F4/80) expression using IHC to confirm the lack of mature T and B cells (scale  
104 bar: 100μm). (D) Ex vivo colon cultures were established from 2-month-old mice and analysed  
105 for IL-10, IL-6, IL-21, IL-33, IFN-γ and CD40L expression using multiplex analysis (minimum  
106 n=9 per group). Data presented as either bar charts or scatter plot graph show mean values ±  
107 s.e.m. Statistical analyses were conducted by Mann-Whitney test (B) or one-way ANOVA with  
108 Bonferroni correction (D) where \*  $p \leq 0.05$ , \*\*  $p \leq 0.01$ .

109

110

111

112

113

114

115

116

117

**A**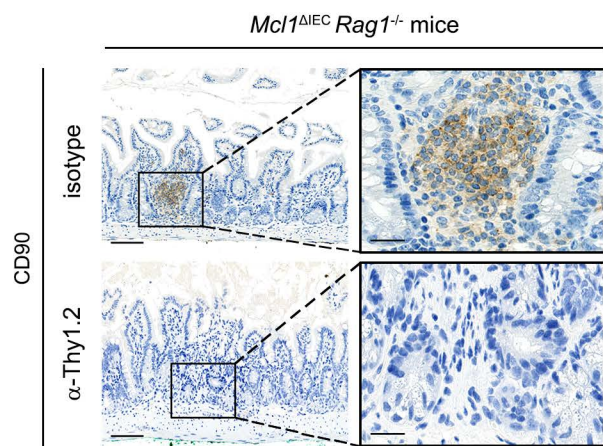**B**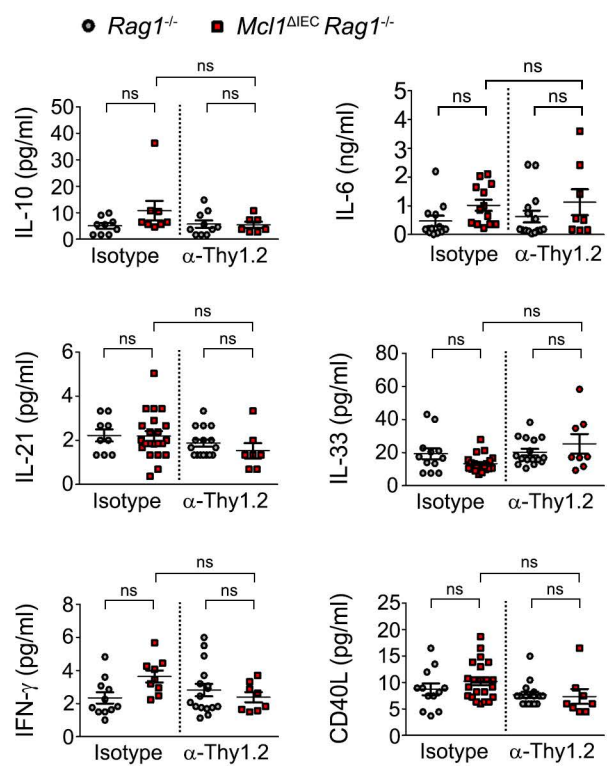

118 **Figure S6: ILC depletion eliminates pro-inflammatory cytokine production.** (A) 2-month-  
119 old *Mcl1<sup>ΔIEC</sup>Rag1<sup>-/-</sup>* mice were treated with either isotype control or  $\alpha$ -Thy1.2 depleting antibody  
120 for 4 weeks. Immunohistochemistry shows CD90 (Thy1) positive cells in the 3-month-old  
121 isotype control treated mice, which are not present in the mice that received  $\alpha$ -Thy1.2 depleting  
122 antibody, thus indicating efficient depletion of ILC (scale bars: 100 $\mu$ m (left images), 25 $\mu$ m (right  
123 images)). (B) Ex vivo colon cultures established from 3-month-old mice and analysed for IL-  
124 10, IL-6, IL-21, IL-33, IFN- $\gamma$  and CD40L expression using multiplex analysis (minimum n=8 per  
125 group). Data presented as scatter plot graph show mean values  $\pm$  s.e.m. Statistical analysis  
126 was conducted by one-way ANOVA with Bonferroni correction (B).

127

128

129

130

131

132

133

134

135

136

137

138

139

140



**A**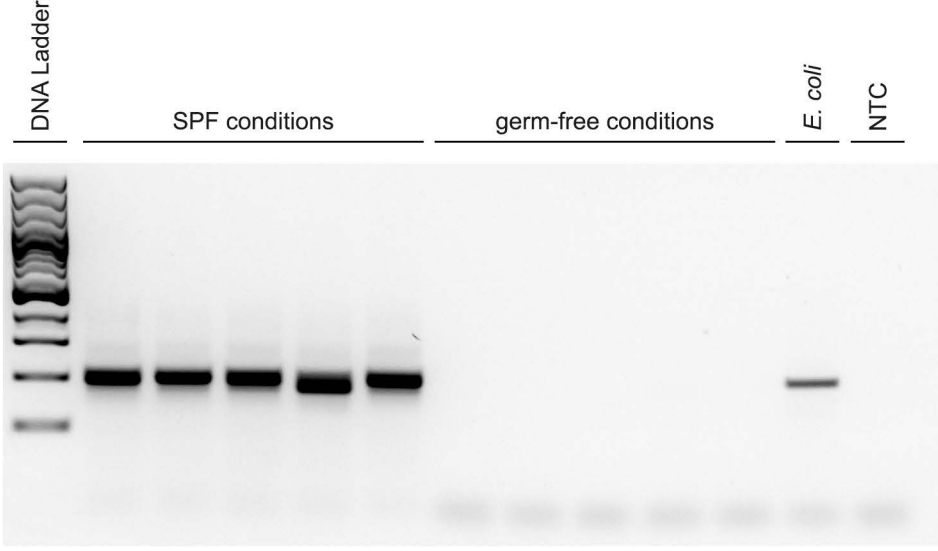**B**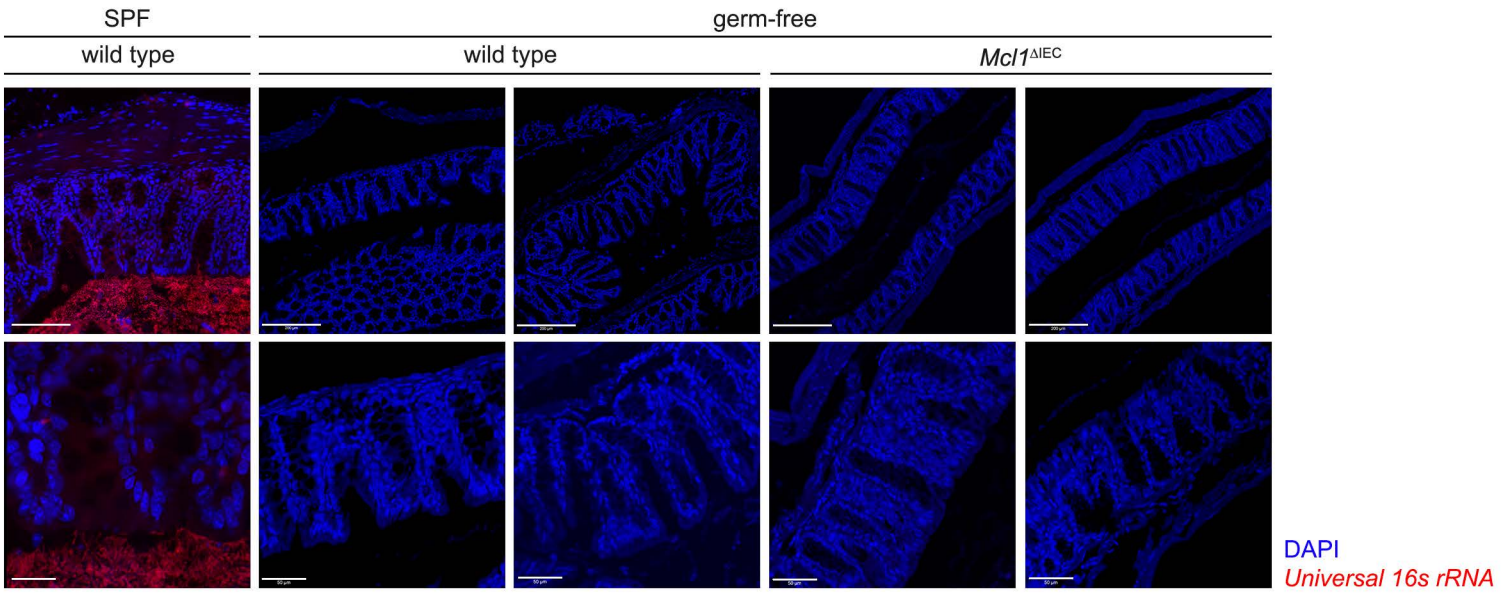

Figure S7. Healy\*, Boege\*, Hodder\* et al.

141 **Figure S7: *Mcl1*<sup>ΔIEC</sup> raised under germ-free conditions are completely void of commensal**  
142 **bacteria.** (A) PCR analysis showing the presence of bacterial 16s DNA isolated from the  
143 faeces of wild type and *Mcl1*<sup>ΔIEC</sup> mice raised under SPF conditions. Samples isolated from the  
144 faeces of wild type and *Mcl1*<sup>ΔIEC</sup> mice raised under germ-free conditions showed no bacterial  
145 16s. *E. coli* was used as a positive control. NTC: no-template control. (B) Representative  
146 images from FISH analysis illustrating Universal Bacterial 16S rRNA staining (red) in colon of  
147 a 2-month-old wild type control mouse raised under SPF conditions. No positive FISH signal  
148 was recorded in either wild type control mice or *Mcl1*<sup>ΔIEC</sup> mice raised under germ-free  
149 conditions (scale bars: 200μm top images, 50μm for bottom images).

150

151

152

153

154

155

156

157

158

159

160

161

162

**A**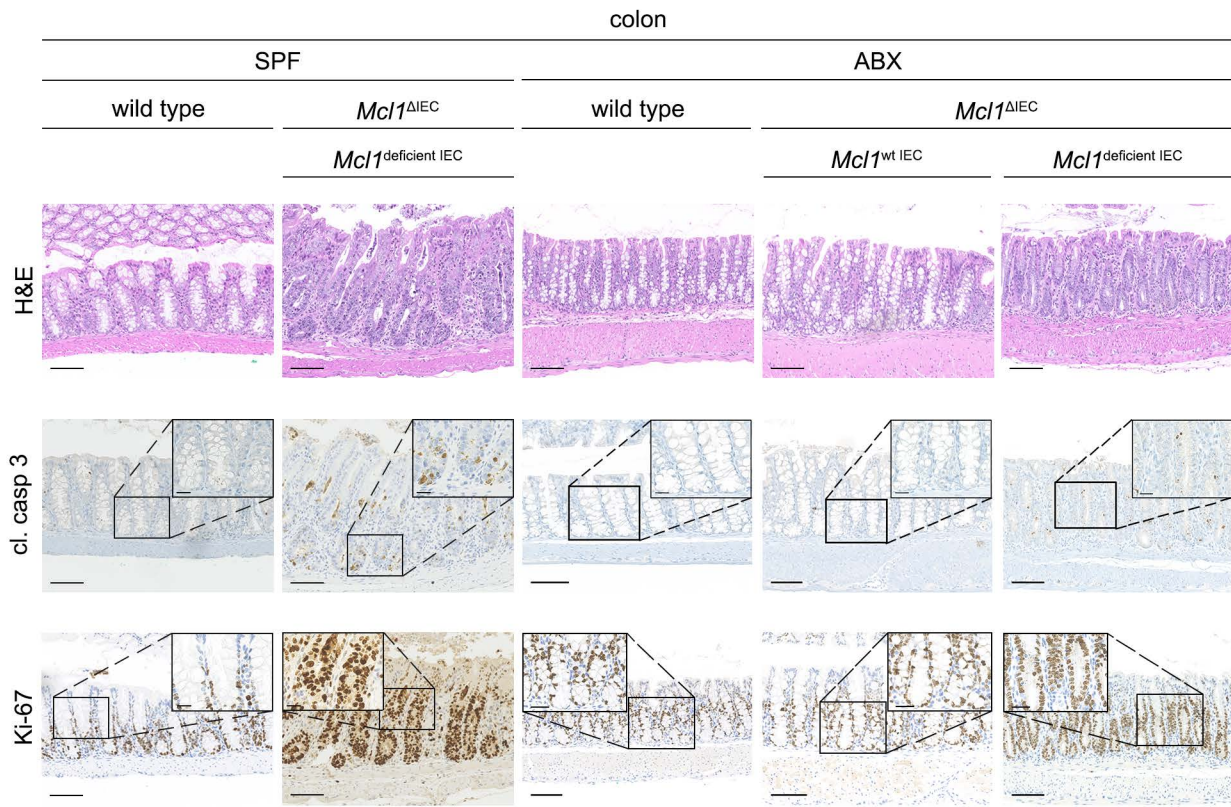**B**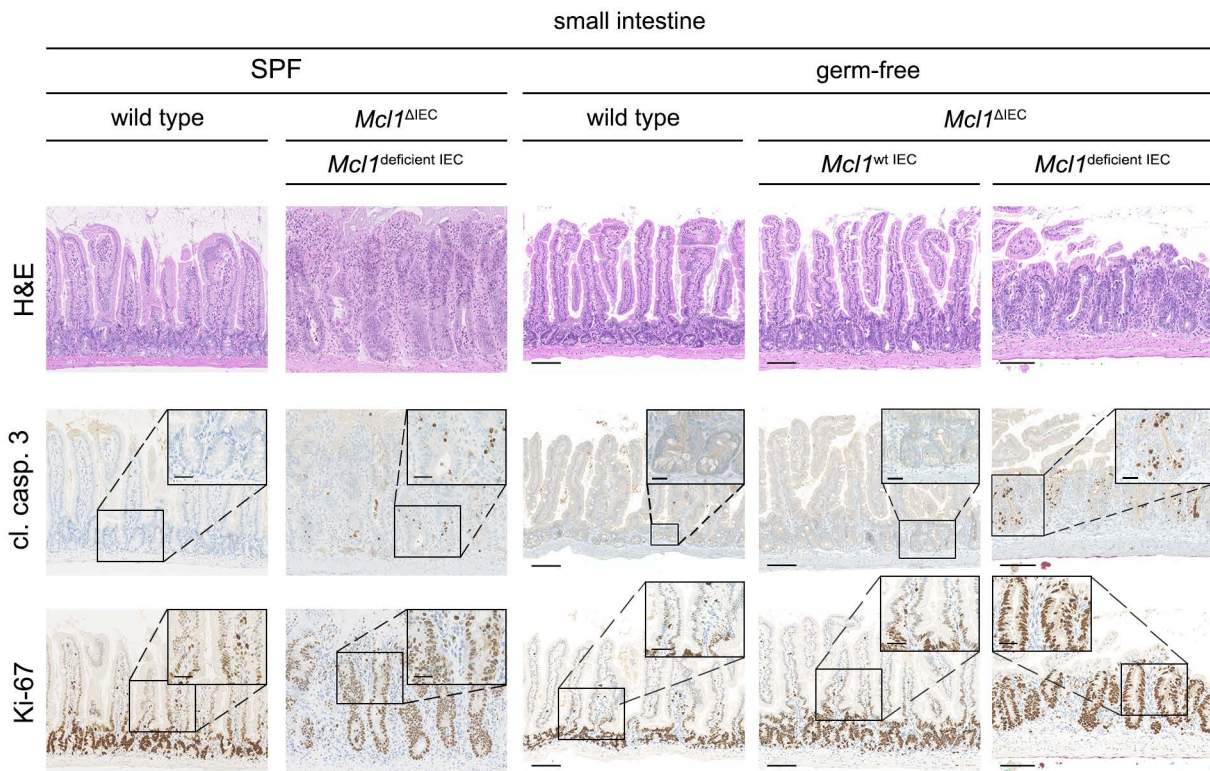**C**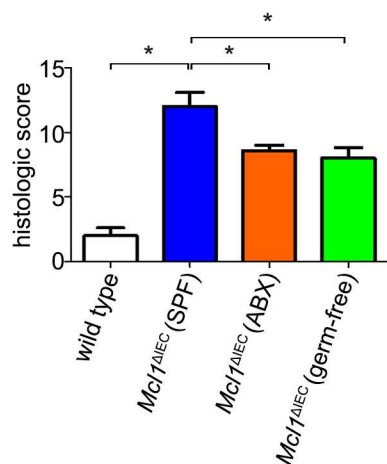**D**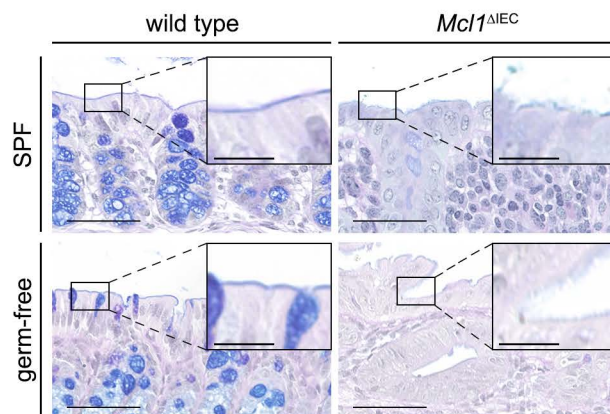

Figure S8. Healy\*, Boege\*, Hodder\* et al.

163 **Figure S8: Increased apoptosis, hyperproliferation and impaired differentiation are a**  
164 **direct consequence of MCL1 deficiency.** (A) Representative images taken from colons of 2-  
165 month-old wild type and *Mcl1*<sup>ΔIEC</sup> mice following ABX treatment illustrating retained IEC  
166 apoptosis (cl. casp 3) and hyperproliferation (Ki-67) (scale bars 100μm, 25μm for inserts). (B)  
167 Representative images from the small intestine from 2-month-old germ-free wild type control  
168 mice compared with germ-free *Mcl1*<sup>ΔIEC</sup> mice illustrating that increased apoptosis (cl. casp. 3)  
169 and hyperproliferation (Ki-67) caused by MCL1 deficiency are also observed under germ-free  
170 conditions (scale bars: 100μm, 25μm for inserts). (C) Blinded histological scoring illustrating  
171 significantly reduced histological score in the small intestine of ABX treated 2-month-old  
172 *Mcl1*<sup>ΔIEC</sup> mice and 2-month-old germ-free *Mcl1*<sup>ΔIEC</sup> mice compared with age-matched *Mcl1*<sup>ΔIEC</sup>  
173 mice housed under SPF conditions (n=5). (D) Representative images illustrating the defective  
174 intestinal epithelial barrier in *Mcl1*<sup>ΔIEC</sup> mice, irrespective of whether these mice were housed  
175 under SPF or germ-free conditions (scale bars: 100μm for top images, 25μm for bottom). Data  
176 presented as scatter plot graph show mean values ± s.e.m. Statistical analyses were evaluated  
177 by Mann-Whitney test (C) where \*  $p \leq 0.05$ .

178

179

180

181

182

183

184

185

186

187



**A**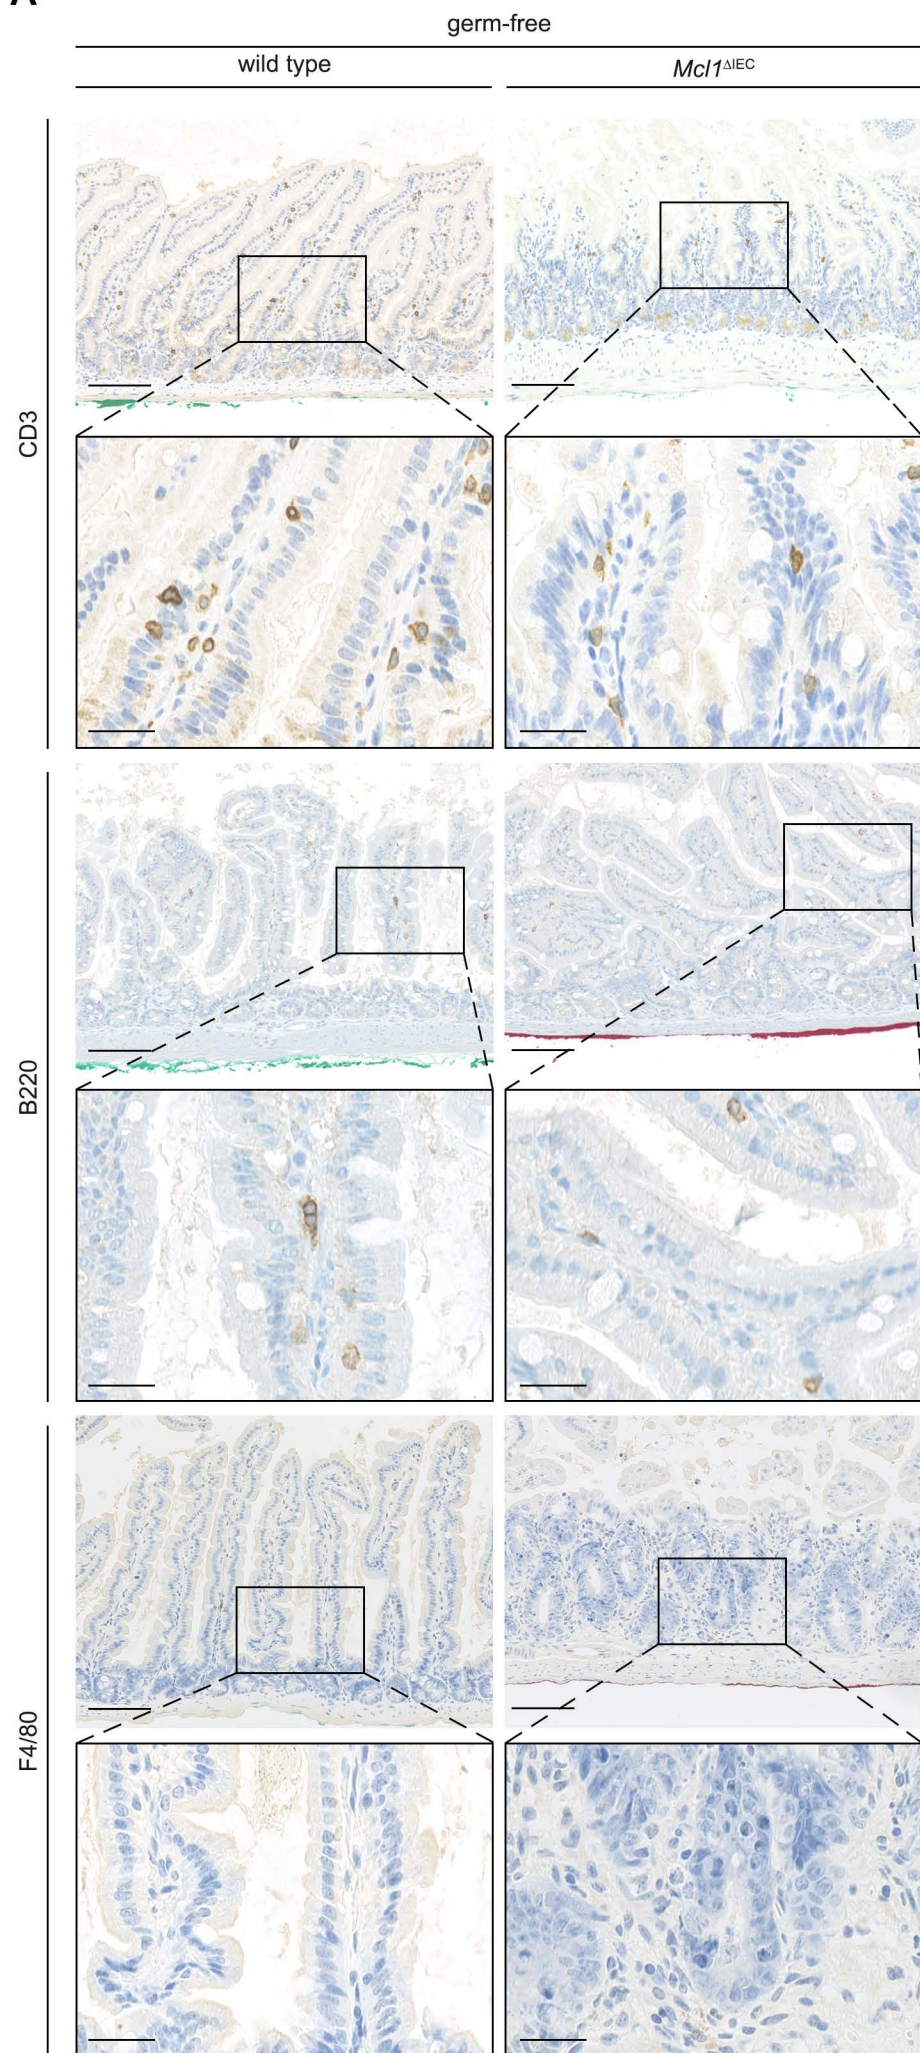**B**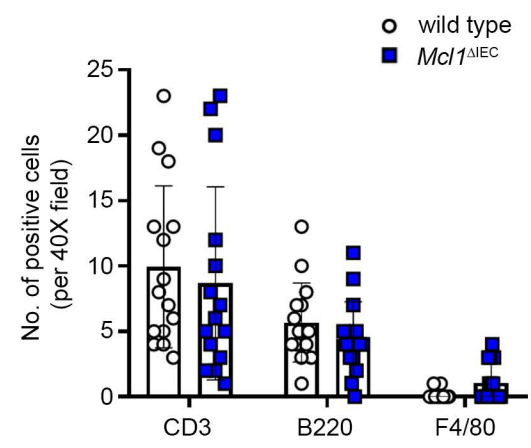

Figure S9. Healy\*, Boege\*, Hodder\* et al.

188 **Figure S9: *Mcl1* deletion does not result in intestinal inflammation under germ-free**  
189 **conditions.** (A) Immunohistochemical characterisation of lymphocytes in the colon of 2-  
190 month-old germ-free wild type control mice compared with *Mcl1*<sup>ΔIEC</sup> littermates showing no  
191 increase in infiltrating T cells (CD3), B cells (B220) or macrophages (F4/80) in germ-free  
192 *Mcl1*<sup>ΔIEC</sup> mice (scale bar: 100μm). (B) Quantification of infiltrating T cells, B cells and  
193 macrophages in germ-free *Mcl1*<sup>ΔIEC</sup> mice compared with littermate controls. Data presented as  
194 scatter plot graph show mean values ± s.e.m. Statistical analyses were evaluated by Mann-  
195 Whitney test (B).

196

197

198

199

200

201

202

203

204

205

206

207

208

209

210

**A**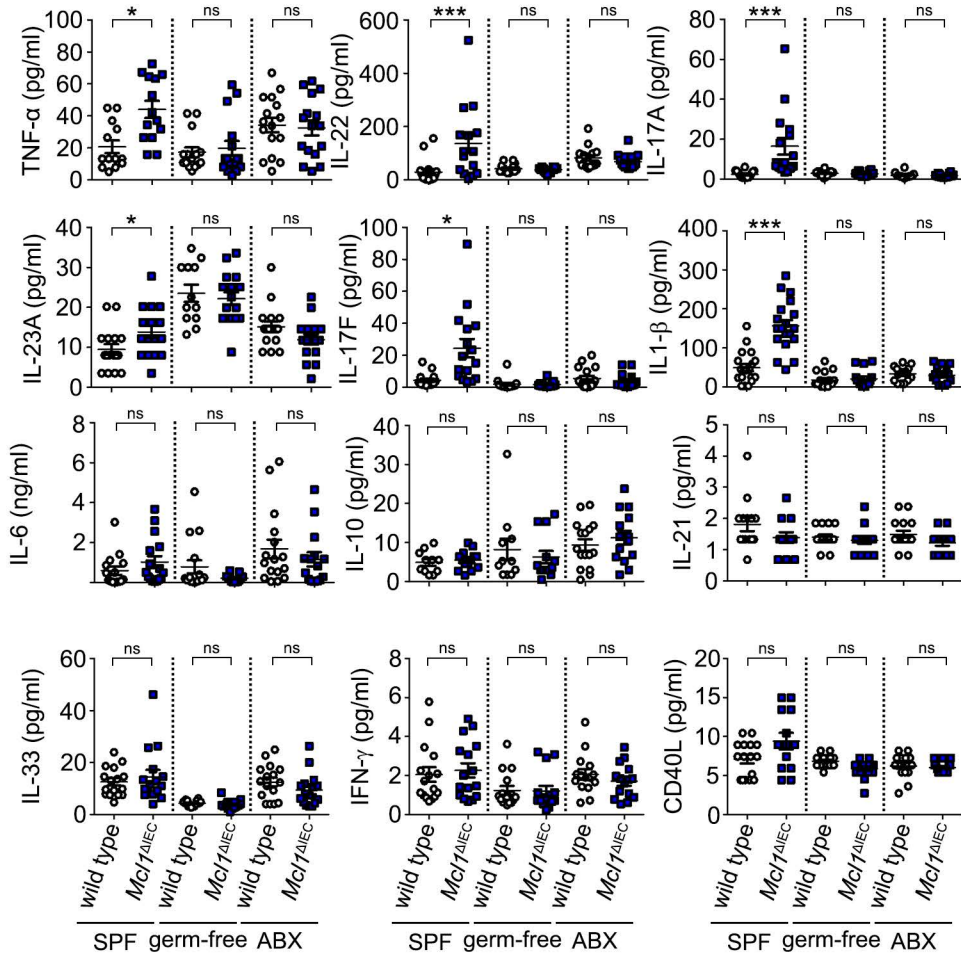

211 **Figure S10: Chronic inflammation observed in *Mcl1*<sup>ΔIEC</sup> mice is an immune response**  
212 **against disseminating commensal bacteria.** (A) Ex vivo colon cultures were established  
213 from 2-month-old mice and analysed for TNF- $\alpha$ , IL-22, IL-23A, IL17A, IL-17F, IL-1 $\beta$ , IL-10, IL-  
214 6, IL-21, IL-33, IFN- $\gamma$  and CD40L expression using multiplex analysis (minimum n=12 per  
215 group). Data presented as scatter plot graph show mean values  $\pm$  s.e.m. Statistical analyses  
216 were evaluated by one-way ANOVA with Bonferroni correction (A) where \*  $p \leq 0.05$ , \*\*  $p \leq 0.01$ ,  
217 \*\*\*  $p \leq 0.001$ .

218

219

220

221

222

223

224

225

226

227

228

229

230

231

232

233



**A**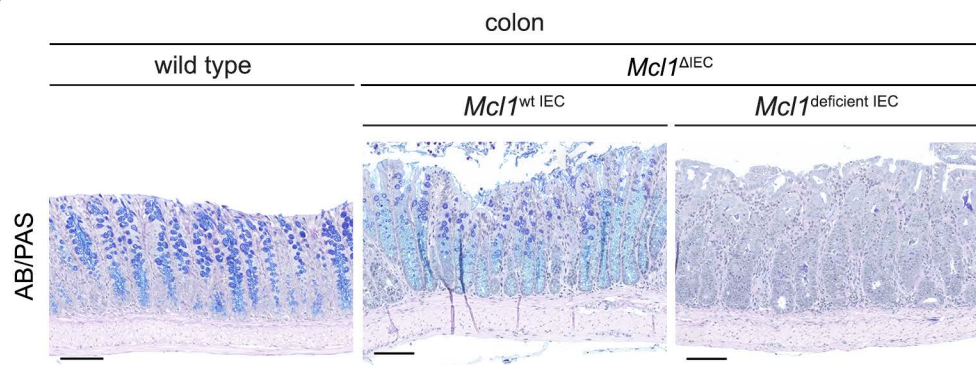**B**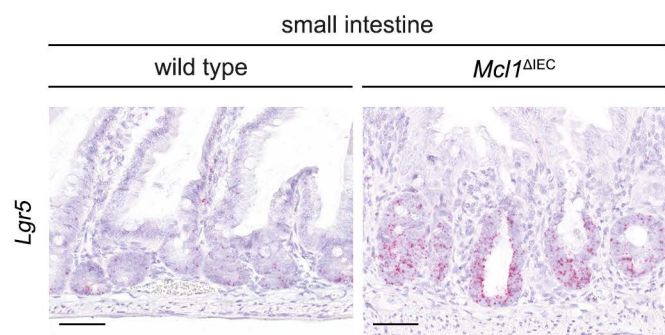

234 **Figure S11: MCL1 is essential for ISC differentiation to secondary secretory lineages**  
235 **and protection from DNA damage.** (A) Representative images taken from colons of 2-month-  
236 old wild type and *Mcl1*<sup>ΔIEC</sup> mice illustrating the impaired ISC differentiation to goblet cells  
237 (AB/PAS) (scale bar: 100μm). (B) Representative images from the small intestine from 2-  
238 month-old germ-free wild type control mice compared with *Mcl1*<sup>ΔIEC</sup> littermate mice illustrating  
239 expansion of the *Lgr5*<sup>+</sup> ISC compartment by *in situ* hybridization (scale bar: 50μm).

240

241

242

243

244

245

246

247

248

249

250

251

252

253

254

255

**A***Mcl1*<sup>ΔIEC</sup>*Mcl1*<sup>wt</sup> IEC*Mcl1*<sup>deficient</sup> IEC*Atoh1*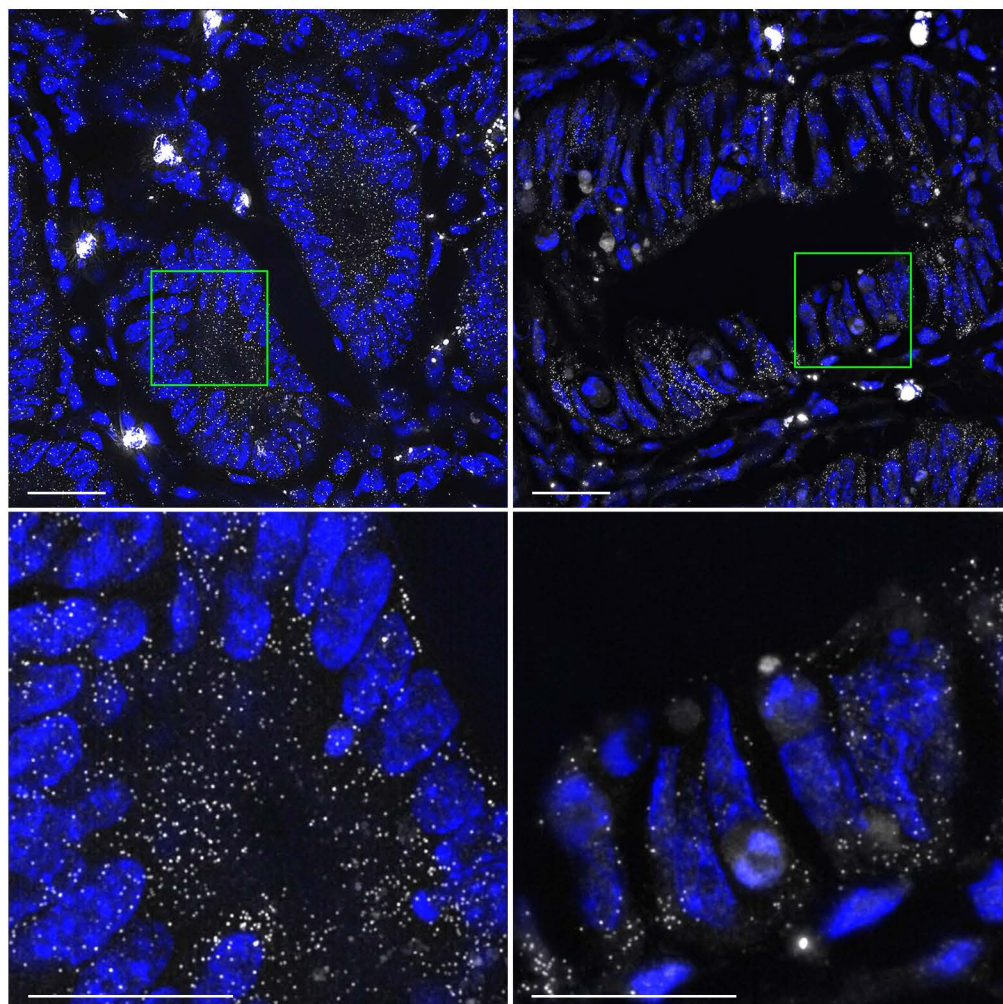**B***Mcl1*<sup>ΔIEC</sup>*Mcl1*<sup>wt</sup> IEC*Mcl1*<sup>deficient</sup> IEC*Mcl1*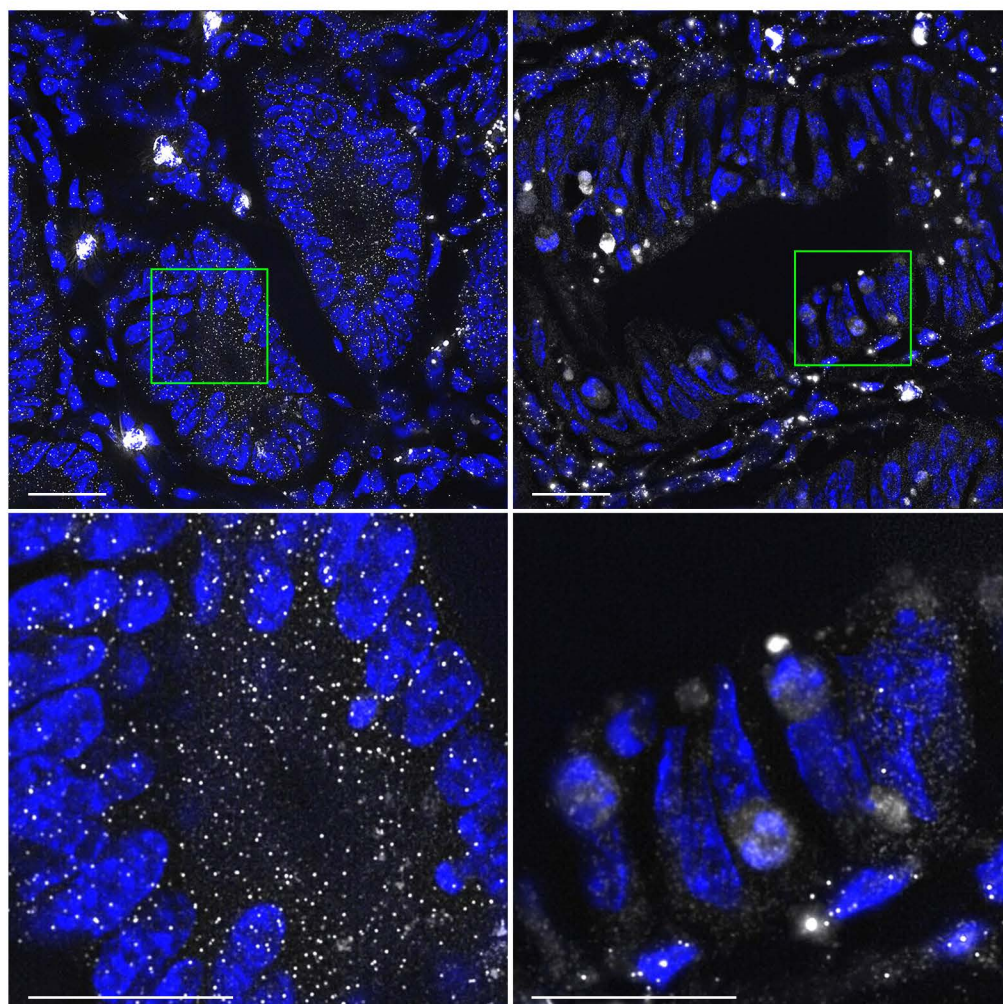

Figure S12. Healy\*, Boege\*, Hodder\* et al.

256 **Figure S12: *Mcl1* deficiency correlates with a marked reduction of *Atoh1* expression in**  
257 **intestinal crypts.** (A) Corresponding single colour control images from Figure 4D. *Atoh1*  
258 expression levels in *Mcl1*-positive versus *Mcl1*-deficient IEC visualized using smFISH. White  
259 dots represents single molecules of *Atoh1*. Green boxes mark the areas shown in higher  
260 magnification in the image directly below (scale bars: 25 $\mu$ m for top images, 10 $\mu$ m for bottom  
261 images). (B) Corresponding single colour control images from Figure 4D. *Mcl1* expression  
262 levels in *Mcl1*-positive versus *Mcl1*-deficient IEC visualized using smFISH. White dots  
263 represents single molecules of *Mcl1*. Green boxes mark the areas shown in higher  
264 magnification in the image directly below (scale bars 25 $\mu$ m for top images, 10 $\mu$ m for bottom  
265 images).

266

267

268

269

270

271

272

273

274

275

276

277

278

279



**A**

SPF

wild type

*Mcl1*<sup>ΔIEC</sup>

γH2AX

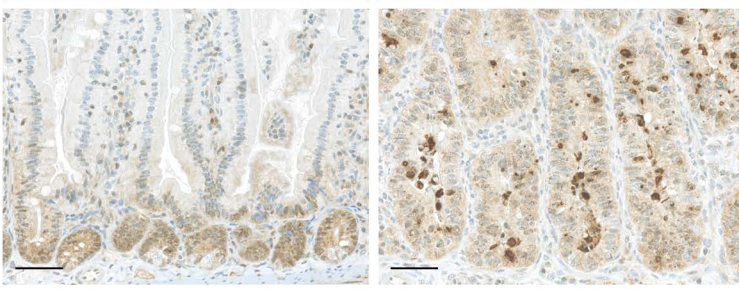

germ-free

wild type

*Mcl1*<sup>ΔIEC</sup>

γH2AX

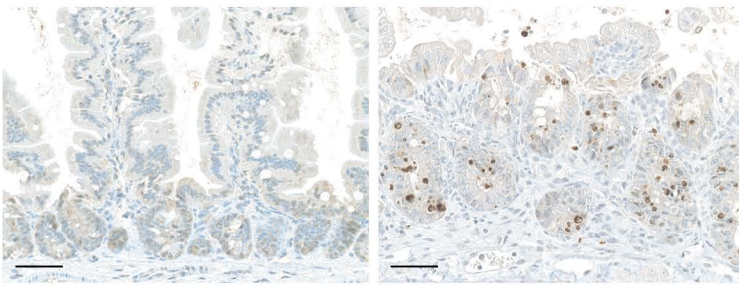**B**

wild type

*Mcl1*<sup>ΔIEC</sup>

γH2AX

β-actin

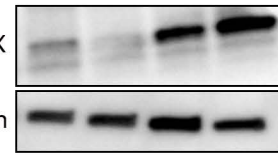



280 **Figure S13: Mcl1 protects IEC from the accumulation of DNA damage.** (A) IHC comparing  
281  $\gamma$ H2AX positivity in 2-month-old *Mcl1*<sup>ΔIEC</sup> mice with littermate controls (scale bar: 50 $\mu$ m). (B)  
282 Western blot analysis corroborating the marked increase in  $\gamma$ H2AX levels in *Mcl1*<sup>ΔIEC</sup> mice  
283 compared to littermate controls.

284

285

286

287

288

289

290

291

292

293

294

295

296

297

298

299

300

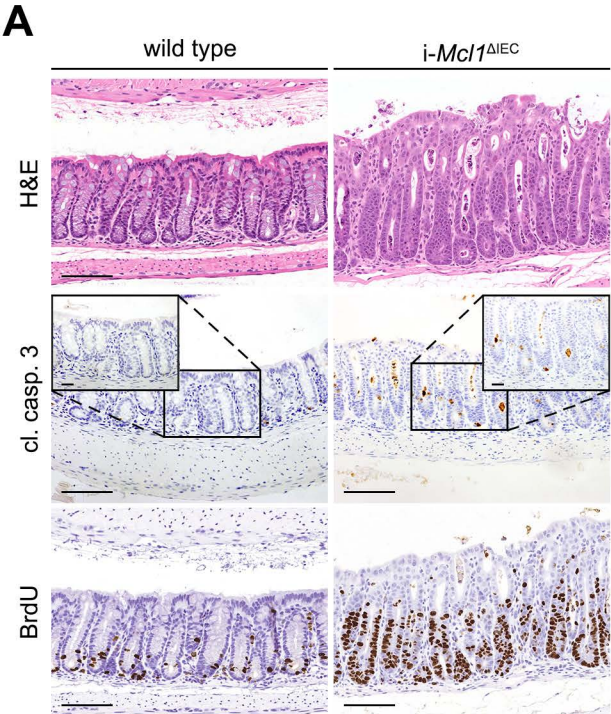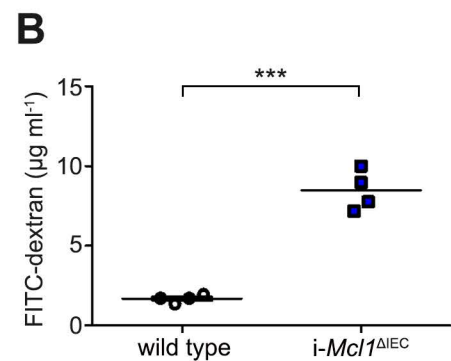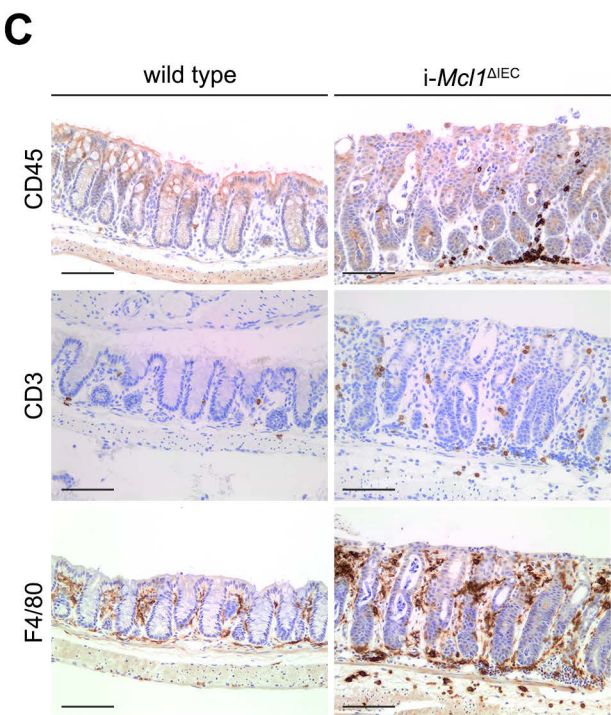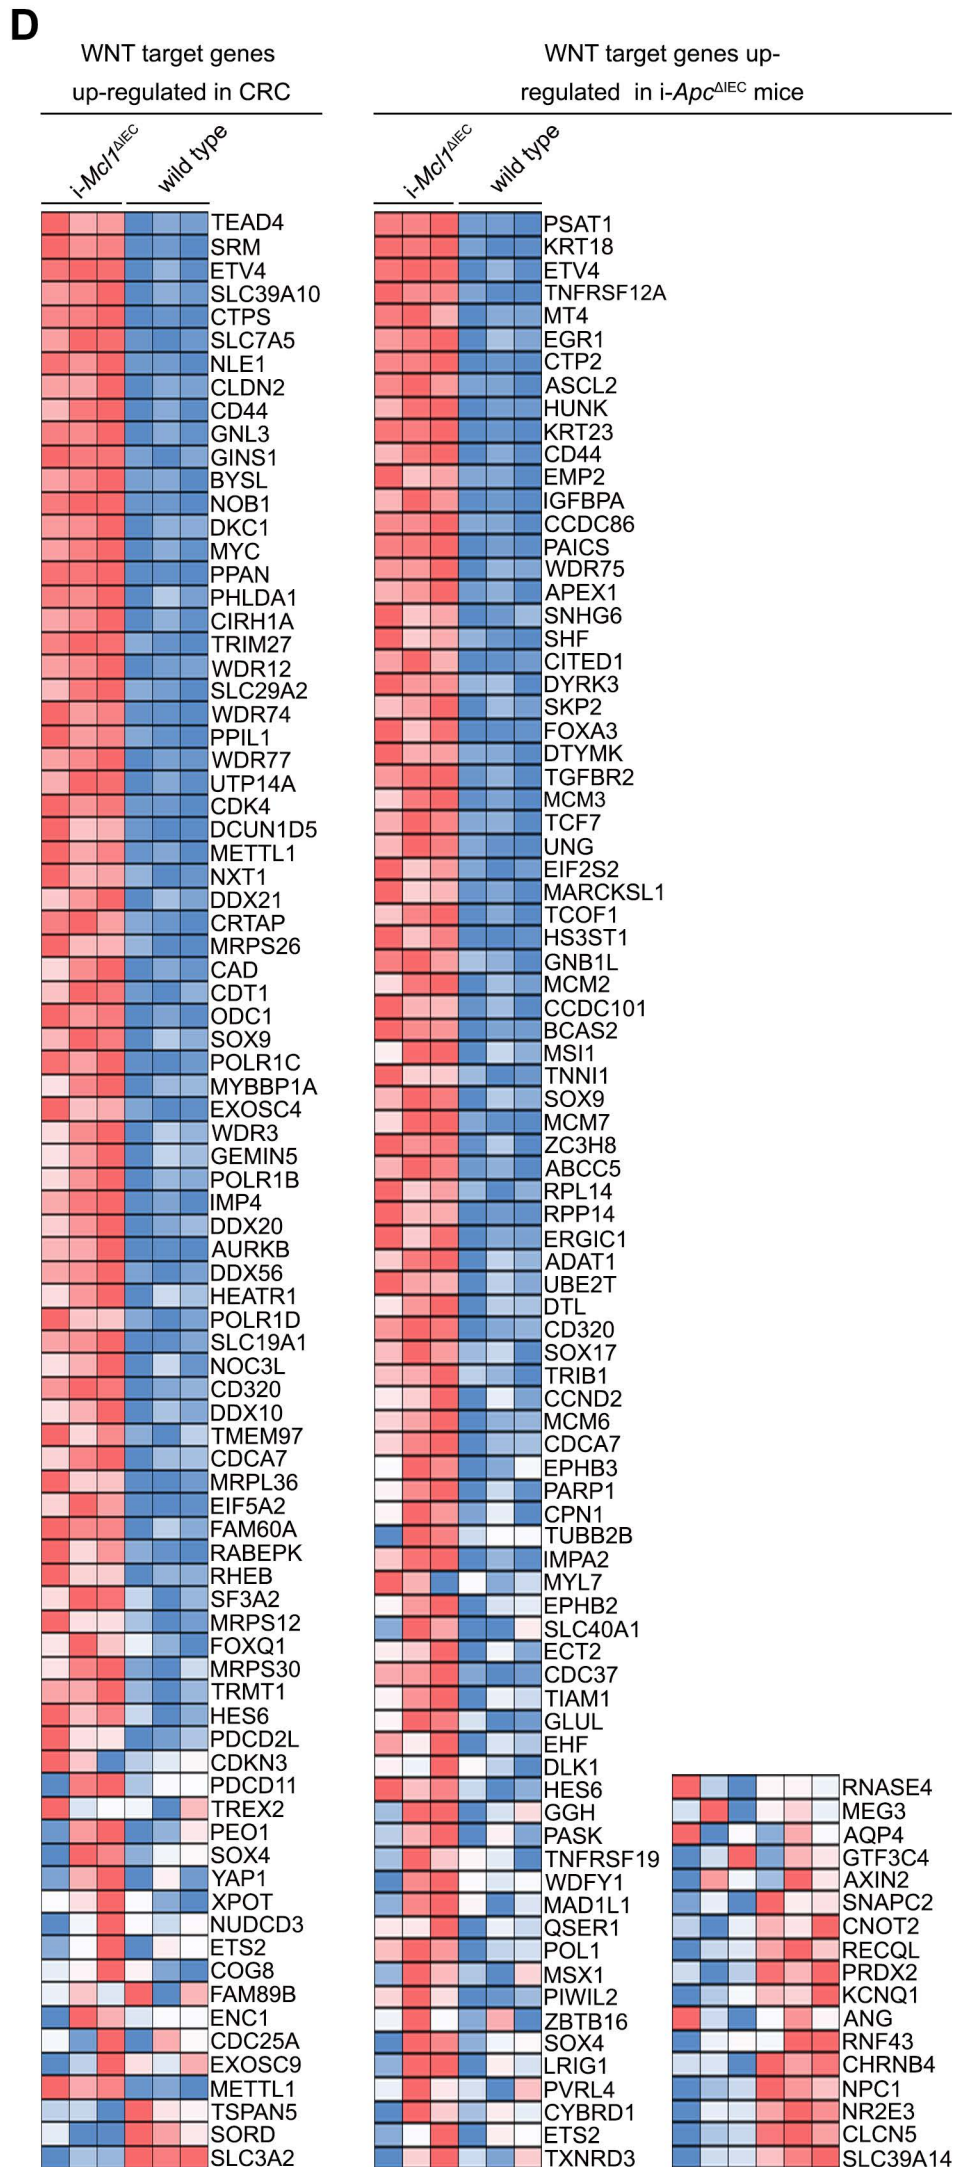

Figure S14. Healy\*, Boege\*, Hodder\* et al.

301 **Figure S14: IEC MCL1 deficiency results in activation of WNT signalling pathways.** (A)  
302 Representative images from the colon of wild type control and *i-Mcl1<sup>ΔIEC</sup>* mice showing crypt  
303 hyperplasia (H&E), increased apoptosis (cl. casp. 3) and hyper-proliferation (BrdU) in *i-*  
304 *Mcl1<sup>ΔIEC</sup>* mice sampled 4 days post induction, mirroring results observed in the *Mcl1<sup>ΔIEC</sup>* mice  
305 (scale bars: 100μm, 25μm for insert). (B) Serum analysis indicating increased FITC-dextran *i-*  
306 *Mcl1<sup>ΔIEC</sup>* mice compared with age-matched wild type controls 4 hours after oral administration  
307 (2 days after induction, n=4). (C) Immunohistochemical characterisation of lymphocyte  
308 infiltrates in the colon of wild type control mice compared with *i-Mcl1<sup>ΔIEC</sup>* littermates showing  
309 increased lymphocytes (CD45), T cells (CD3) and macrophages (F4/80) in the lamina propria  
310 of *i-Mcl1<sup>ΔIEC</sup>* mice (2 days after induction) (scale bars: 100μm). (D) Expression of genes as  
311 analysed by RNA sequencing of small intestine tissue from *i-Mcl1<sup>ΔIEC</sup>* mice compared with wild  
312 type control mice illustrated in heat maps and captured in the GSEA signatures. WNT target  
313 genes commonly upregulated in human CRC (left), and genes enriched in *i-Apc<sup>ΔIEC</sup>* mice  
314 (right). Red boxes represent high expression while blue boxes represent low expression. Data  
315 presented as scatter plot graph represents mean values ± s.e.m. Statistical analysis was  
316 conducted by Mann-Whitney test (B) where \*\*\*  $p \leq 0.001$ .

317

318

319

320

321

322

323

324

**A**

Genes up-regulated during DNA damage response upon detection of DNA damage

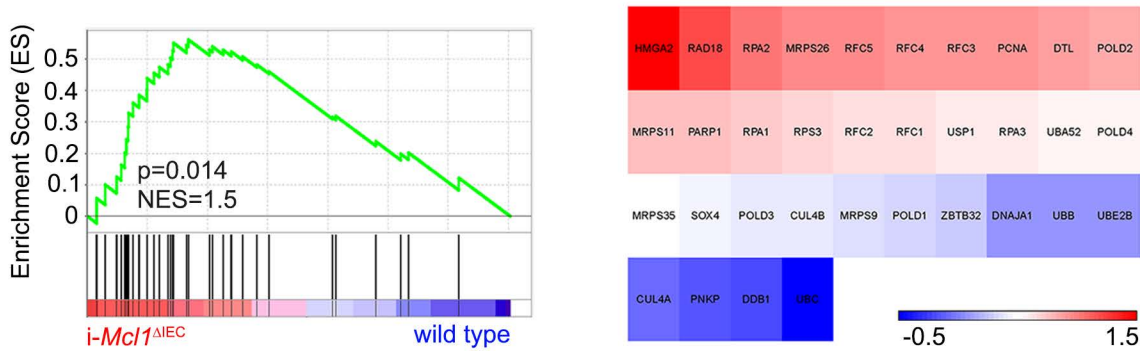

Genes up-regulated during DNA damage checkpoints

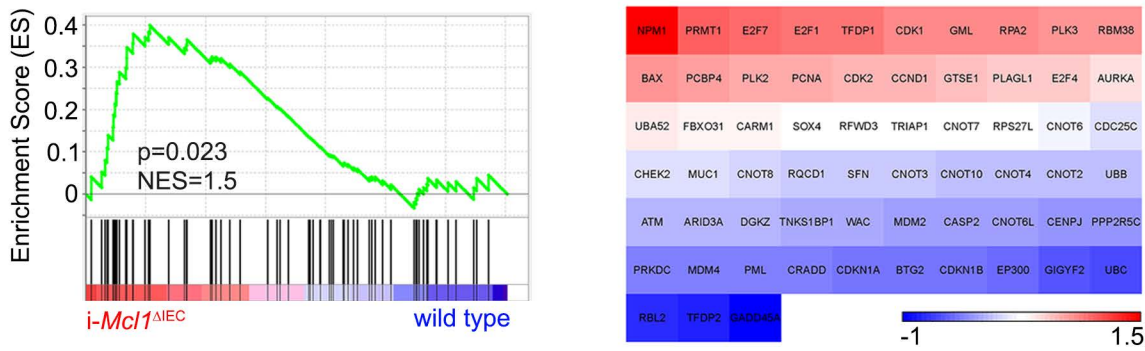

Genes up-regulated during post replication repair

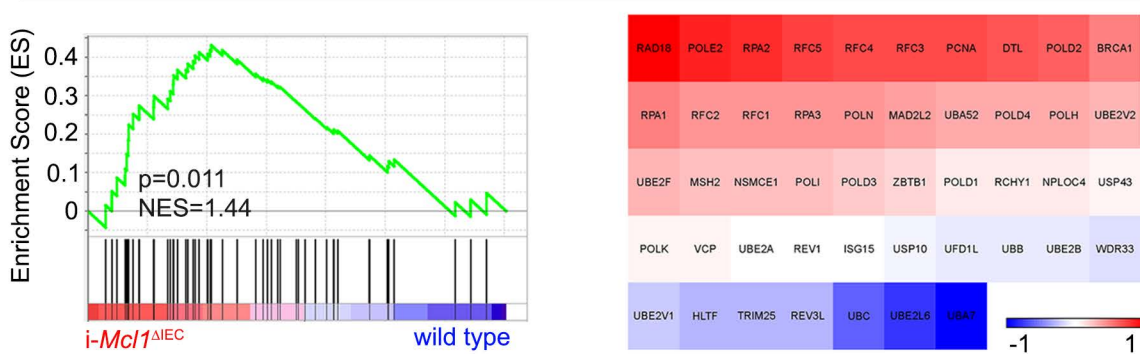

Genes up-regulated during positive regulation of DNA repair

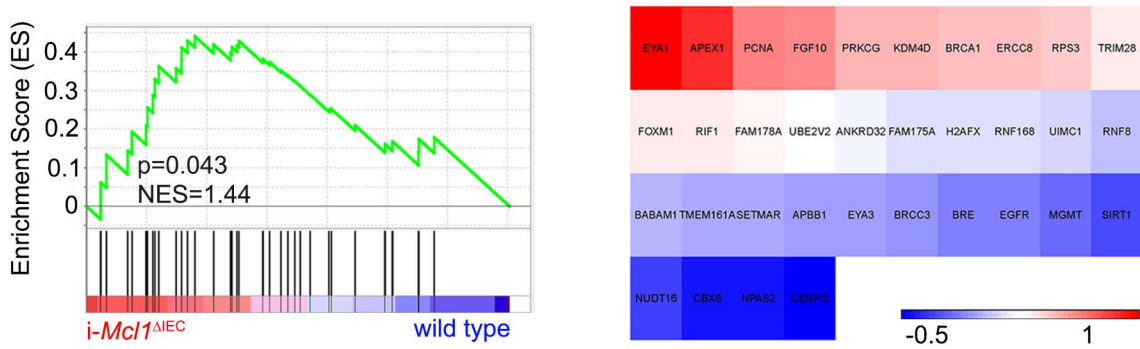

325 **Figure S15: IEC MCL1 deficiency results in up-regulation of DNA damage associated**  
326 **genes.** (A) GSEA plots derived from G0 term gene sets by RNA sequencing analysis of small  
327 intestine tissue from *i-Mcl1<sup>ΔIEC</sup>* mice (samples 3 days after induction) compared with wild type  
328 control mice and corresponding heat maps illustrating increased expression of DNA damage  
329 response associated gene sets in *i-Mcl1<sup>ΔIEC</sup>* mice. Red boxes represent increased expression  
330 while blue boxes represent reduced expression (gene expression values are presented as log2  
331 ratios).

332

333

334

335

336

337

338

339

340

341

342

343

344

345

346

347



**A**

wild type

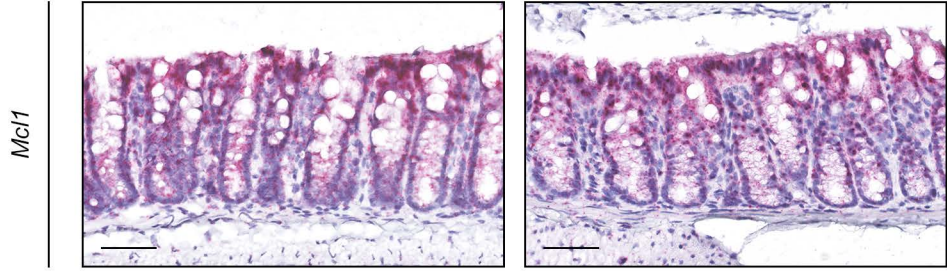*i-Mcl1<sup>ΔIEC</sup>*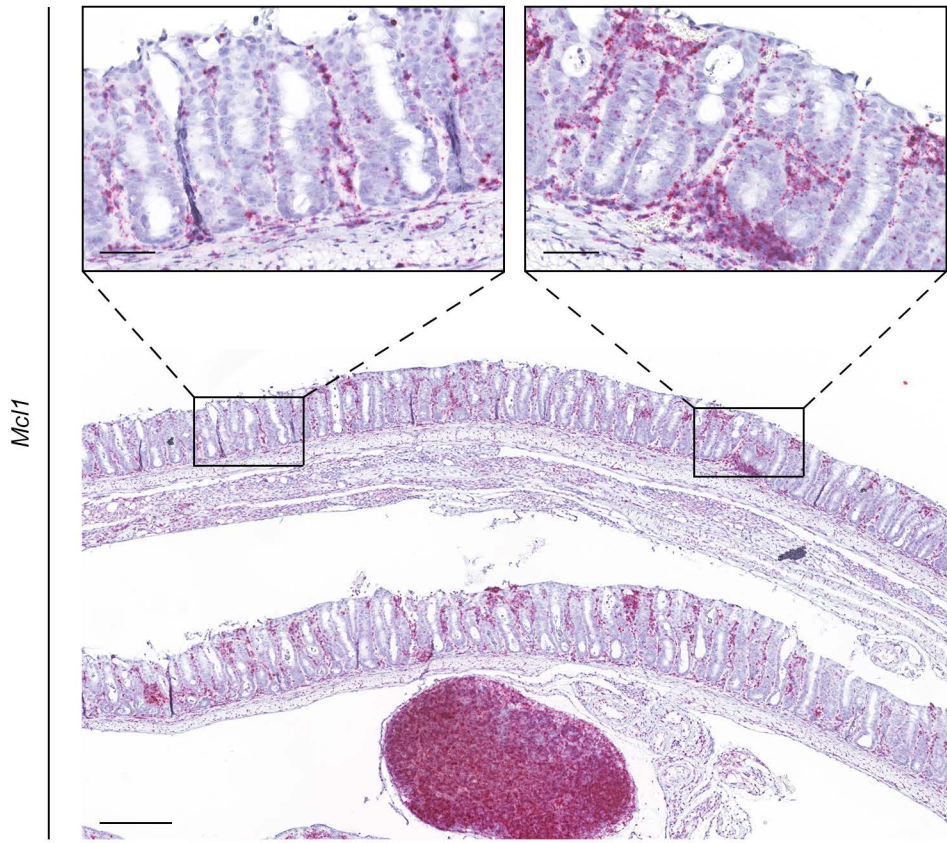

Figure S16. Healy\*, Boege\*, Hodder\* et al.

348 **Figure S16: i-*Mcl1*<sup>ΔIEC</sup> mice show complete recombination of *Mcl1* throughout the entire**  
349 **intestinal tract.** (A) Representative images illustrating *Mcl1* expression in the colon (red stain)  
350 of non-recombined wild type control mice (top panel) compared to i-*Mcl1*<sup>ΔIEC</sup> mice (lower panel)  
351 as demonstrated using *in situ* hybridization (scale bars: 250μm for low magnification image,  
352 50 μm for high magnification images).

353

354

355

356

357

358

359

360

361

362

363

364

365

366

367

368

369

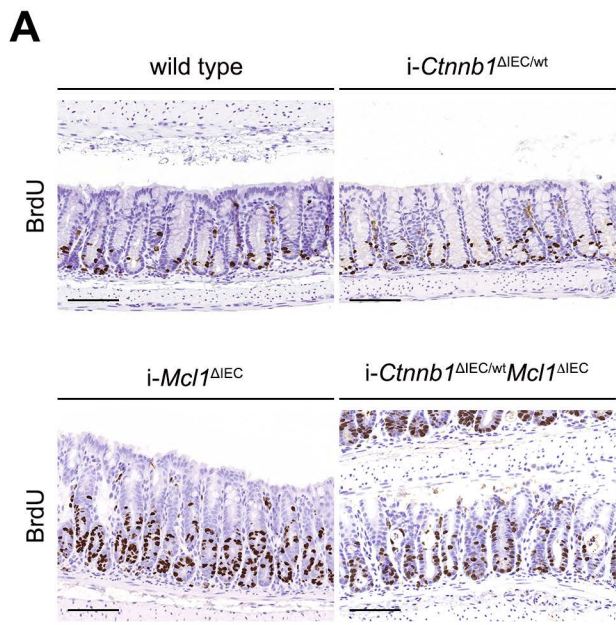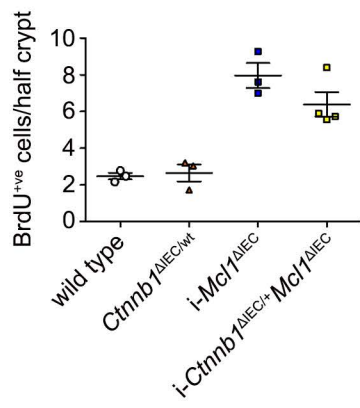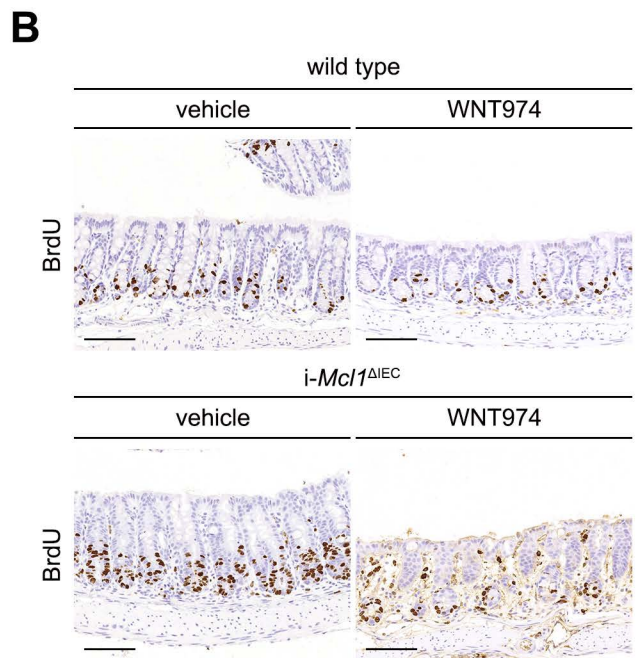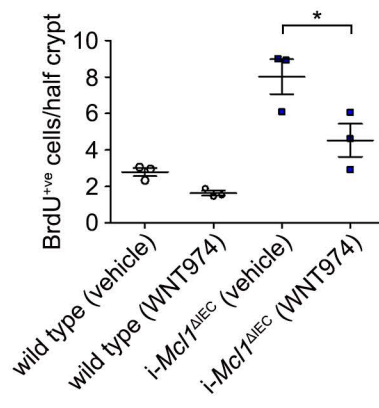

370 **Figure S17: MCL1 deficiency-induced hyperproliferation is dependent on WNT**  
371 **signaling.** (A) BrdU staining from the colon of wild type, *i-Ctnnb1<sup>ΔIEC/+</sup>*, *i-Mcl1<sup>ΔIEC</sup>* and *i-*  
372 *Mcl1<sup>ΔIEC</sup>Ctnnb1<sup>ΔIEC/+</sup>* mice, sampled 4 days after induction, indicating increased epithelial cell  
373 proliferation following *Mcl1* deletion is partially rescued in *i-Mcl1<sup>ΔIEC</sup>Ctnnb1<sup>ΔIEC/+</sup>* mice (scale  
374 bars: 100μm). Quantitative analysis of BrdU positive cells/half crypt is shown below (n=3 or 4  
375 per group). (B) BrdU staining from the colons of vehicle treated wild type and *i-Mcl1<sup>ΔIEC</sup>* mice  
376 compared with WNT974 treated wild type and *i-Mcl1<sup>ΔIEC</sup>* mice, sampled 3 days post induction,  
377 (scale bars: 100μm) as well as quantitative analysis of BrdU positive cells/half crypt illustrating  
378 inhibition of epithelial cell proliferation following WNT974 treatment (n=3 per group) (below).  
379 Data presented as scatter plot graph represents mean values ± s.e.m. Statistical analysis was  
380 conducted by Mann-Whitney test (A-B) where \*  $p \leq 0.05$ .

381

382

383

384

385

386

387

388

389

390

391

392

393



**A**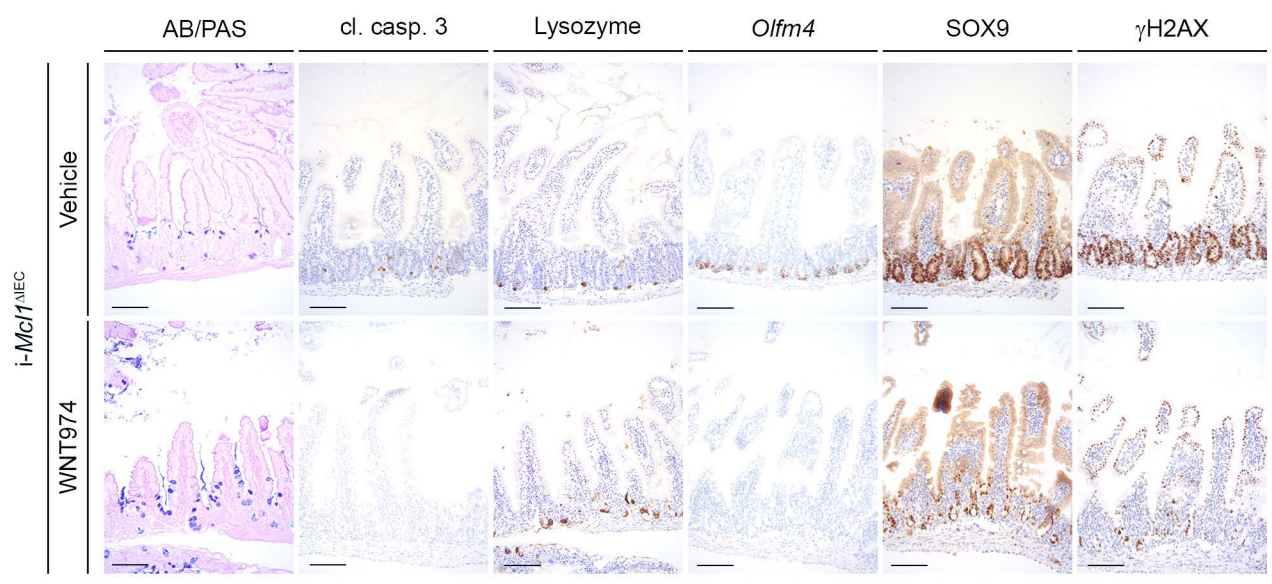**B**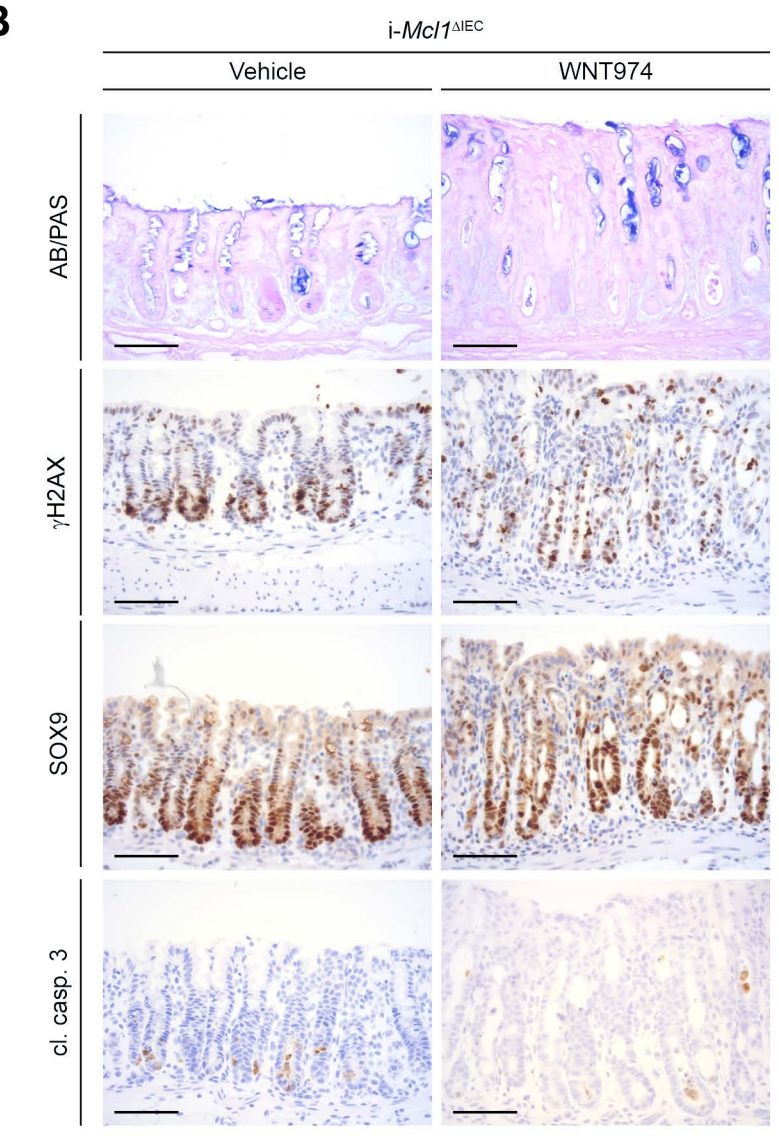

Figure S18. Healy\*, Boege\*, Hodder\* et al.

394 **Figure S18: MCL1-deficiency induced hyperproliferation is dependent on WNT**  
395 **signaling.** (A) Representative images from the small intestine of wild type control and i-  
396 *Mcl1*<sup>ΔIEC</sup> mice following treatment with WNT974 or vehicle control, 3 days post induction.  
397 Images show the effect of WNT974 on ISC differentiation (AB/PAS, Lysozyme), apoptosis (cl.  
398 caps. 3), ISC populations (*Olfm4*, SOX9) and DNA damage ( $\gamma$ H2AX) (scale bars: 100 $\mu$ m). (B)  
399 Representative images from the colon of wild type control and i-*Mcl1*<sup>ΔIEC</sup> mice following  
400 treatment with WNT974 or vehicle control, 3 days post induction. Images show the effect of  
401 WNT974 on ISC differentiation (AB/PAS), apoptosis (cl. caps. 3), ISC populations (SOX9) and  
402 DNA damage ( $\gamma$ H2AX) (scale bars: 100 $\mu$ m).

403

404

405

406

407

408

409

410

411

412

413

414

415

416



**A***Mcl1*<sup>ΔIEC</sup>*Mcl1*<sup>wt</sup> IEC*Mcl1*<sup>deficient</sup> IEC*Wnt2b*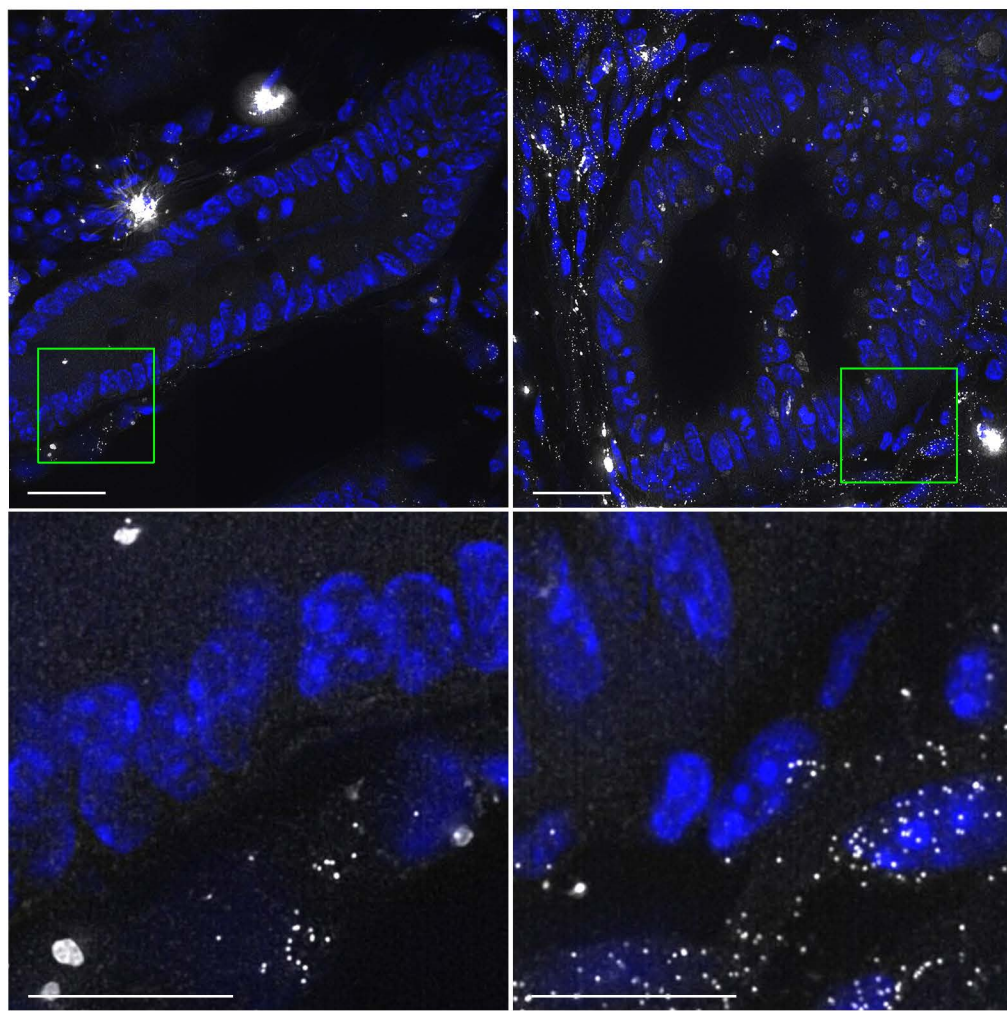**B***Mcl1*<sup>ΔIEC</sup>*Mcl1*<sup>wt</sup> IEC*Mcl1*<sup>deficient</sup> IEC*Mcl1*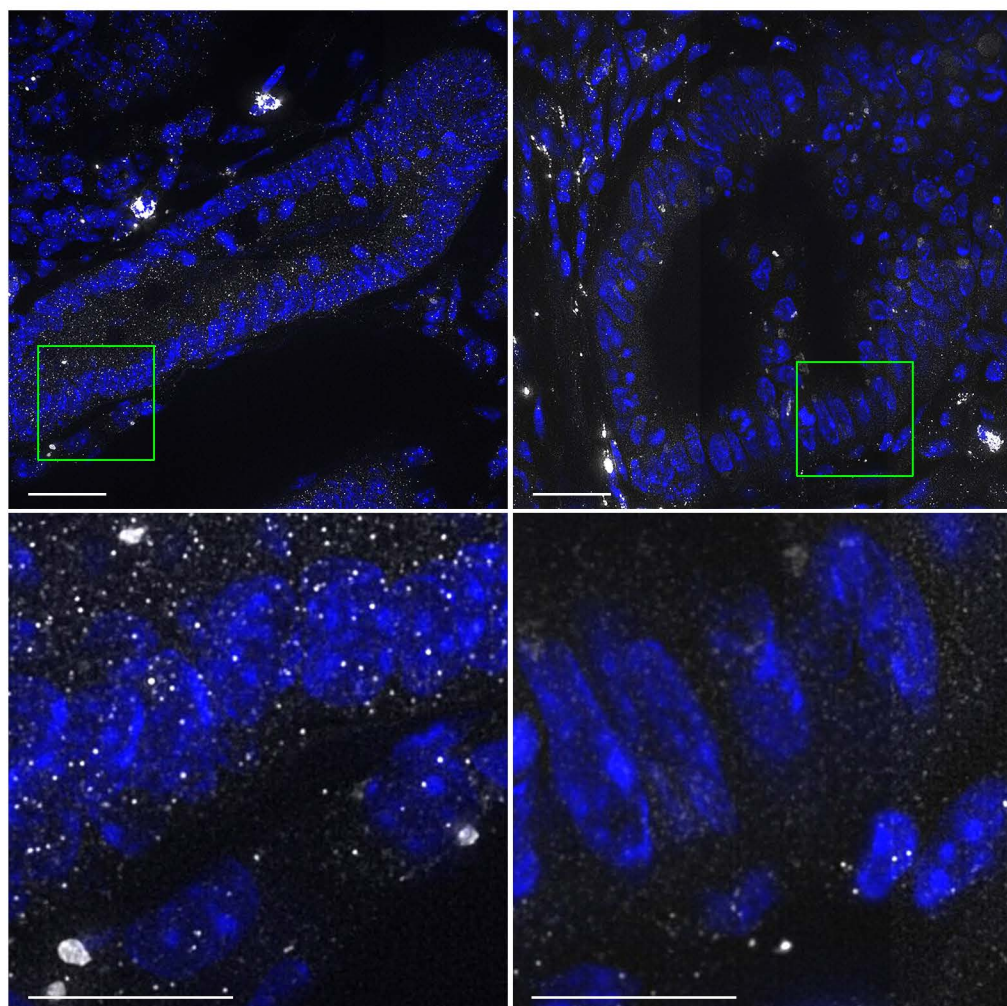

Figure S19. Healy\*, Boege\*, Hodder\* et al.

417 **Figure S19: Increased *Wnt2b* expression is not directly linked to *Mcl1* deficiency.** (A)  
418 Corresponding single colour control images from Figure 5G. *Wnt2b* expression levels in *Mcl1*-  
419 positive versus *Mcl1*-deficient IEC visualized using smFISH. White dots represents single  
420 molecules of *Atoh1*. Green boxes mark the areas shown in higher magnification in the image  
421 directly below (scale bars: 25 $\mu$ m for top images, 10 $\mu$ m for bottom images). (B) Corresponding  
422 single colour control images from Figure 5G. *Mcl1* expression levels in *Mcl1*-positive versus  
423 *Mcl1*-deficient IEC visualized using smFISH. White dots represents single molecules of *Mcl1*.  
424 Green boxes mark the areas shown in higher magnification in the image directly below (scale  
425 bars: 25 $\mu$ m for top images, 10 $\mu$ m for bottom images).

426

427

428

429

430

431

432

433

434

435

436

437

438

439



**A**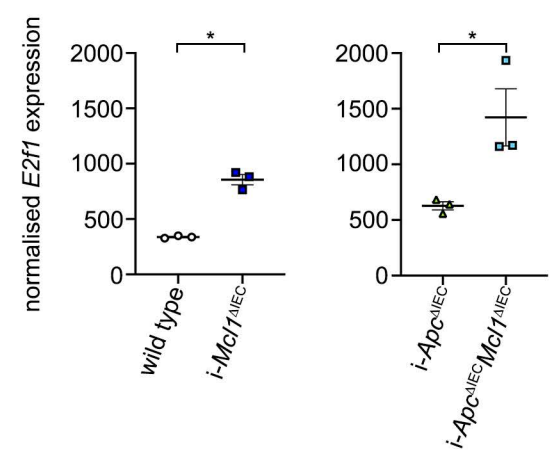**B**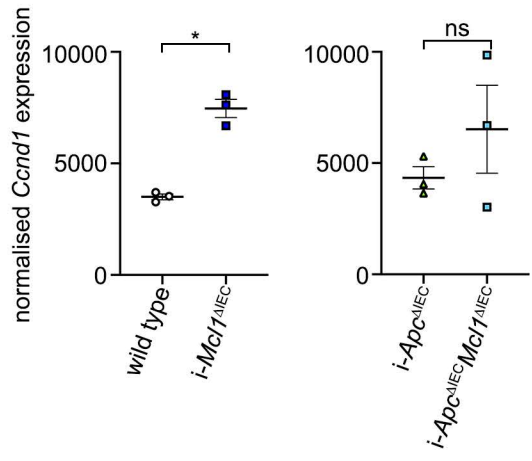**C**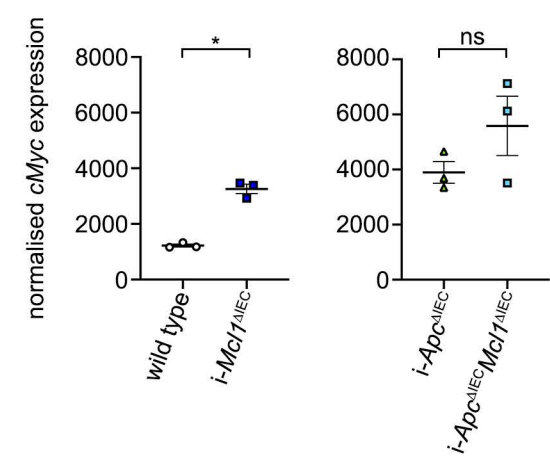**D**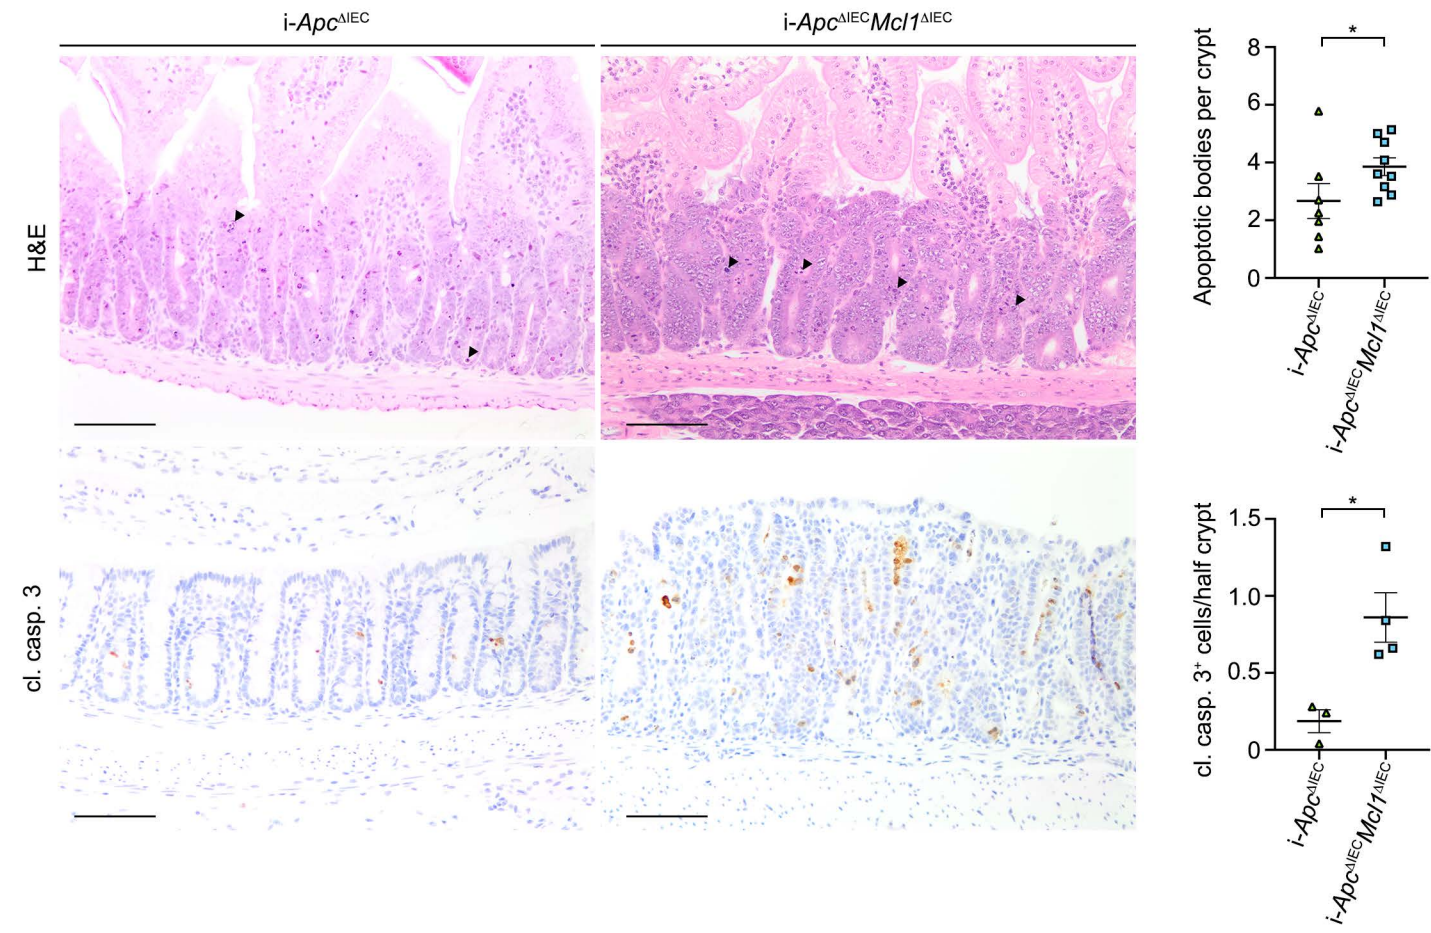

Figure S20. Healy\*, Boege\*, Hodder\* et. al

440 **Figure S20: MCL1 is an essential regulator of IEC proliferation.** Normalised expression  
441 levels of *E2f1* (A), *Ccnd1* (B) and *cMyc* (C) compared between non-recombined wild type  
442 controls and *i-Mcl1<sup>ΔIEC</sup>* mice as well as *i-Apc<sup>ΔIEC</sup>* compared to *i-Apc<sup>ΔIEC</sup>Mcl1<sup>ΔIEC</sup>* mice as  
443 analysed by RNAseq (n=3 per group). (D) Representative H&E images showing apoptotic  
444 bodies (upper panel) and cleaved caspase 3 staining (lower panel) of *i-Apc<sup>ΔIEC</sup>* mice  
445 compared to age-matched *i-Apc<sup>ΔIEC</sup>Mcl1<sup>ΔIEC</sup>* mice. Results from the quantification of apoptotic  
446 bodies (top graph) in *i-Apc<sup>ΔIEC</sup>* mice (n=7) versus *i-Apc<sup>ΔIEC</sup>Mcl1<sup>ΔIEC</sup>* mice (n=9) as well as  
447 cleaved caspase 3 positive IEC (bottom graph) in *i-Apc<sup>ΔIEC</sup>* mice (n=3) versus *i-Apc<sup>ΔIEC</sup>Mcl1<sup>ΔIEC</sup>*  
448 mice (n=4) are also shown (scale bars: 100μm). Statistical analysis was conducted by Mann-  
449 Whitney test (A-D) where \*  $p \leq 0.05$ .

450

451

452

453

454

455

456

457

458

459

460

461

462

**A***i-Apc<sup>ΔIEC</sup>**i-Apc<sup>ΔIEC</sup>Mcl1<sup>ΔIEC</sup>*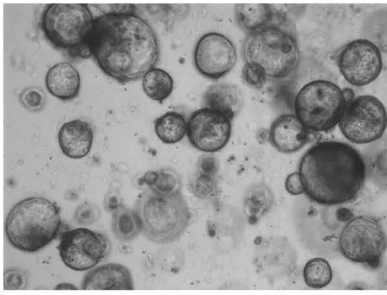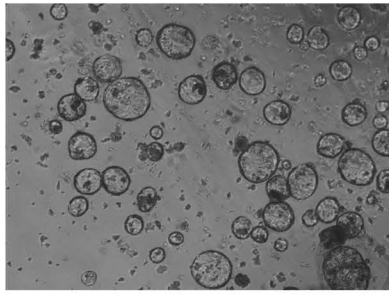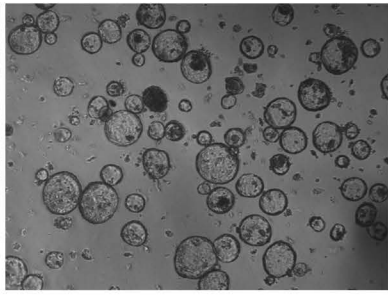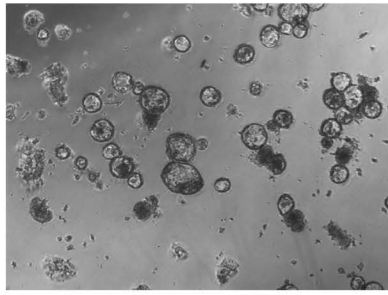

463 **Figure S21: Carcinoma development in *Mcl1*<sup>ΔIEC</sup> mice follows the Vogelstein model of**  
464 **colorectal cancer development. (A) Representative images of small intestine derived**  
465 **organoids from *i-Apc*<sup>ΔIEC</sup> mice or *i-Apc*<sup>ΔIEC</sup>*Mcl1*<sup>ΔIEC</sup> mice (40x) in vitro (≥5 passages).**

466

467

468

469

470

471

472

473

474

475

476

477

478

479

480

481

482

483



**A**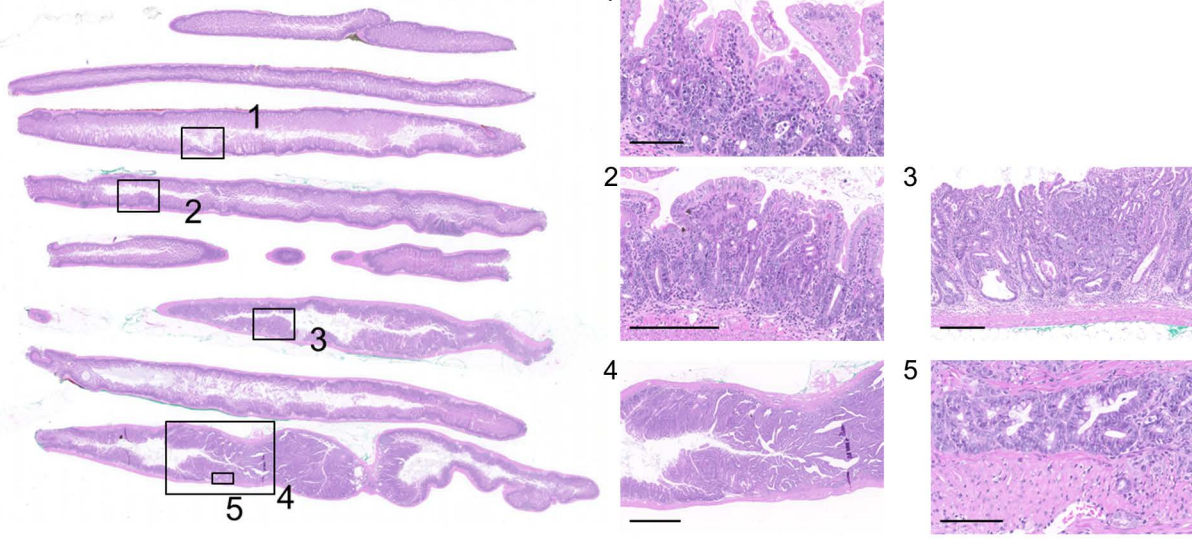**B***Mcl1*<sup>ΔIEC</sup> Confetti<sup>tg/+</sup> mice

2 months

12 months

Higher magnification of tumor

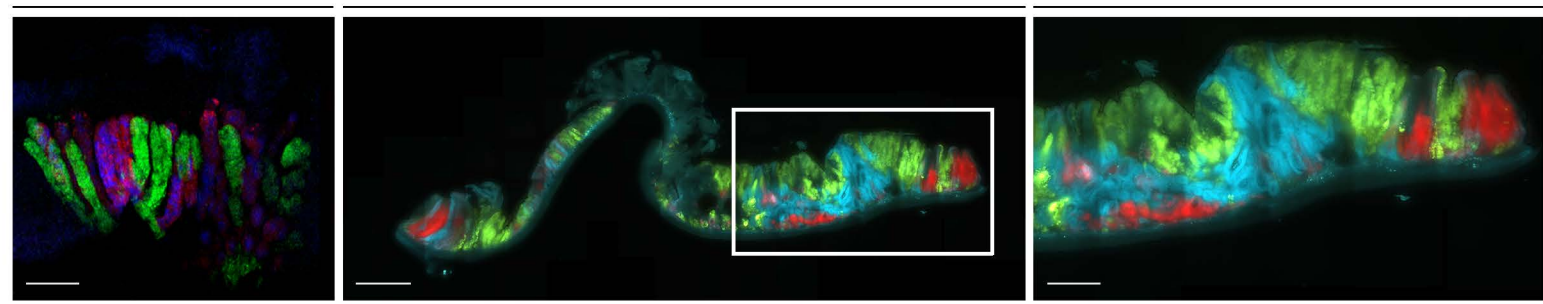**C**

CD44

CDX2

Synaptophysin

Ki-67

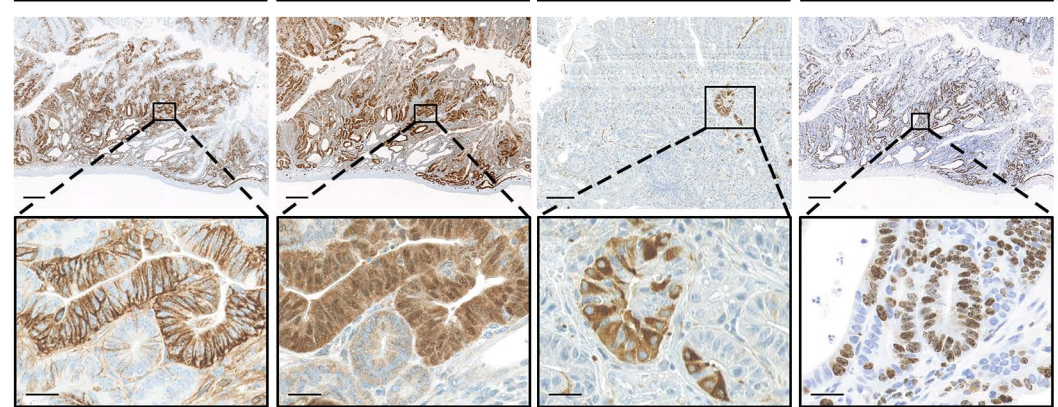**D***Axin2*

SPF

germ-free

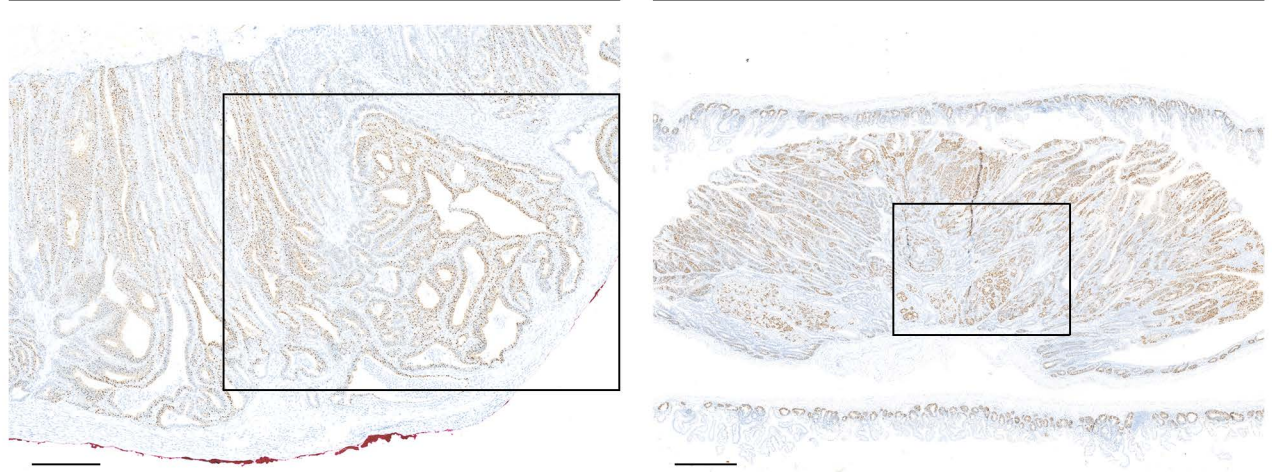

Figure S22. Healy\*, Boege\*, Hodder\* et al.



484 **Figure S22: Carcinoma development in *Mcl1*<sup>ΔIEC</sup> mice follows the Vogelstein model of**  
485 **colorectal cancer development.** (A) Examples of MCL1 deficient tumor qualities used to  
486 determine tumor classification in 12-month-old *Mcl1*<sup>ΔIEC</sup> mice (Fig. 7B). Image 1 illustrates  
487 hyperplasia within intestinal crypt cells (scale bar: 100μm), 2 illustrates representative low  
488 grade adenoma (LGA) (scale bar: 250μm), 3 illustrates representative high grade adenoma  
489 (HGA) (scale bar: 250μm) while images 4 and 5 illustrate representative carcinoma under low  
490 (scale bar: 1mm) and high (scale bar: 100μm) magnification. (B) Tumor heterogeneity  
491 illustrated by representative images of tumors observed in 12-month-old *Mcl1*<sup>ΔIEC</sup> *Confetti*<sup>tg/wt</sup>  
492 mouse (scale bars: 100μm-left, 250μm-centre and 100μm-right). (C) Heterogeneous  
493 differentiation within carcinoma showing CD44, CDX2, synaptophysin and Ki-67 (scale bars  
494 250μm for upper panel images, 50μm for lower panel images). (D) Strong *Axin2* expression  
495 in tumors isolated from 12-month-old *Mcl1*<sup>ΔIEC</sup> mouse irrespective of whether mice were  
496 housed under spf or germ-free conditions determined using *in situ* hybridization (scale bars:  
497 250μm-left, 500μm-right). Areas marked with black boxes represent the areas shown under  
498 higher magnification in Figure 7E.

499

500

501

502

503

504

505

506

507

A

| Gene          | Chr:Pos        | REF     | ALT | Codon variant       | Functional Variant | Mucosa, wt  | Hyperplasia/LGD 1 spf | Hyperplasia/LGD 2 gf | Carcinoma 1 spf | Carcinoma 2 spf | Carcinoma 3 spf  | Carcinoma 4 gf | Carcinoma 5 gf |
|---------------|----------------|---------|-----|---------------------|--------------------|-------------|-----------------------|----------------------|-----------------|-----------------|------------------|----------------|----------------|
| <i>Apc</i>    | chr18:34312747 | C       | T   | c.2695C>T           | p.Gln899*          | ./.         | ./.                   | ./.                  | ./.             | C/T (38,41)     | ./.              | ./.            | ./.            |
| <i>Apc</i>    | chr18:34316309 | A       | G   | c.6257A>G           | p.Asp2086Gly       | A/G (50,52) | A/G (32,20)           | A/G (27,23)          | ./.             | ./.             | A/G (37,32)      | ./.            | A/G (22,18)    |
| <i>Lrp5</i>   | chr19:3659357  | C       | T   | c.372G>A            | p.Thr124Thr        | ./.         | C/T (19,21)           | ./.                  | ./.             | ./.             | C/T (29,14)      | ./.            | ./.            |
| <i>Fbxw7</i>  | chr3:84903756  | A       | G   | c.187A>G            | p.Asn63Asp         | ./.         | ./.                   | G/G (1,19)           | ./.             | ./.             | ./.              | ./.            | ./.            |
| <i>Fbxw7</i>  | chr3:84903911  | A       | G   | c.342A>G            | p.Glu114Glu        | ./.         | ./.                   | ./.                  | ./.             | G/G (1,22)      | ./.              | G/G (1,33)     | ./.            |
| <i>Fbxw7</i>  | chr3:84954904  | A       | G   | c.540A>G            | p.Glu180Glu        | ./.         | ./.                   | ./.                  | ./.             | ./.             | ./.              | G/G (2,75)     | ./.            |
| <i>Pole</i>   | chr5:110299343 | A       | C   | c.2081A>C           | p.Lys694Thr        | ./.         | ./.                   | ./.                  | A/C (18,10)     | ./.             | ./.              | ./.            | ./.            |
| <i>Arid1a</i> | chr4:133689170 | ATA TAC | A   | c.3289_3293delTATAC | p.Gln1096fs        | ./.         | ./.                   | ./.                  | ./.             | ./.             | ATATAC/A (62/24) | ./.            | ./.            |
| <i>Ctnnb1</i> | chr9:120950606 | C       | A   | c.98C>A             | p.Ser33Tyr         | ./.         | ./.                   | ./.                  | ./.             | ./.             | C/A (23,5)       | ./.            | ./.            |
| <i>Ctnnb1</i> | chr9:120950630 | C       | T   | c.122C>T            | p.Thr41Ile         | ./.         | ./.                   | C/T (23,14)          | C/T (12,6)      | ./.             | ./.              | ./.            | ./.            |
| <i>Ctnnb1</i> | chr9:120950642 | C       | T   | c.134C>T            | p.Ser45Phe         | ./.         | ./.                   | ./.                  | ./.             | ./.             | ./.              | ./.            | C/T (11,6)     |

|  |                         |
|--|-------------------------|
|  | pathogenic              |
|  | potentially pathogenic  |
|  | functionally irrelevant |
|  | wild type               |

Figure S23. Healy\*, Boege\*, Hodder\* et al.

508 **Figure S23: MCL1-deficiency associated carcinoma show a number of pathogenic**  
509 **mutations in key WNT signalling regulating genes.** (A) Selected mutations detected by  
510 whole-exome sequencing and variant filtration. Missense mutations in the genes of interest  
511 are displayed by allelic state. The coverage of the position for each allele is given in  
512 brackets."./." is the wild type sequence. Exome data were aligned to the *Mus musculus*  
513 reference genome (GRCm38/mm10) and codon variants are displayed according to the  
514 following transcript references: *Apc* - ENSMUST00000079362, *Lrp5* -  
515 ENSMUST00000176867, *Fbxw7* - ENSMUST00000107678, *Pole* - ENSMUST00000007296,  
516 *Arid1a* - ENSMUST00000105897, *Ctnnb1* - ENSMUST00000145093. Abbreviations: Chr:Pos  
517 = Position in reference genome; REF = reference allele; ALT = alternative allele; LGD = low  
518 grade dysplasia. The color code illustrates the clinical significance of the homolog mutation in  
519 humans (see Supplementary Tables S7 – S12 for more information).

520

521

522

523

524

525

526

527

528

529

530

531

532 **Supplemental Information:**

533 **Mice**

534 Housing and experimental procedures of all animals were performed in accordance with the  
535 Cantonal Veterinary Office (Zurich, Switzerland) under the license numbers ZH217/12 and  
536 ZH166/15 or the UK Home Office regulations (licence 70/8646) as well adhering to ARRIVE  
537 guidelines. Animals were maintained under specific pathogen free (SPF) conditions at the  
538 University of Zurich, Switzerland, or at the CRUK Beatson Institute, Glasgow, Scotland. Germ-  
539 free housing of mice was performed within the Clean Mouse Facility of the University of Bern  
540 via embryo transfer <sup>1</sup>.

541 Mice with an IEC specific deletion of *Mcl1*, *Mcl1<sup>flox/flox</sup>* mice <sup>2,3</sup> were crossed with mice expressing  
542 Cre-recombinase under the enterocyte-specific villin promoter, to generate IEC-specific *Mcl1*  
543 knockout mice (*Mcl1<sup>flox/flox</sup> Vil1cre<sup>tg/+</sup>*) (*Mcl1<sup>ΔIEC</sup>* mice). *Mcl1<sup>ΔIEC</sup>* mice were backcrossed onto the  
544 *Rag1<sup>-/-</sup>* background (Jackson Laboratories, mouse strain 002216) to generate *Mcl1<sup>ΔIEC</sup> Rag1<sup>-/-</sup>*  
545 mice. Confetti<sup>tg/+</sup> mice (Jackson Laboratories, mouse strain 017492) were intercrossed to  
546 *Mcl1<sup>ΔIEC</sup>* mice to generate *Mcl1<sup>ΔIEC</sup> Confetti<sup>tg/+</sup>* mice. These mouse lines were generated at the  
547 University of Zurich. Both male and female mice were used for each experiment. Age-matched  
548 and littermate mice that did not carry the Villin-Cre transgene were used as wild type control  
549 mice.

550 Mice with an IEC-specific inducible deletion of *Mcl1* (*i-Mcl1<sup>ΔIEC</sup>* mice), *Ctnnb1* (*i-Ctnnb1<sup>ΔIEC</sup>*  
551 mice), *Apc* (*i-Apc<sup>ΔIEC</sup>* mice) as well as double knockout mice (*i-Ctnnb1<sup>ΔIEC</sup> Mcl1<sup>ΔIEC</sup>* mice and *i-*  
552 *Apc<sup>ΔIEC</sup> Mcl1<sup>ΔIEC</sup>* mice) were generated at the CRUK Beatson Institute, Glasgow. Genetic  
553 depletion in these mice was typically induced between 6 and 12 weeks of age when weighing  
554 over 20g. Genetic alleles used were: *Vil-Cre-ER<sup>T2</sup>* <sup>4</sup>, *Mcl1<sup>fl</sup>* <sup>5</sup>, *Ctnnb1<sup>f</sup>* <sup>6</sup> and *Apc* <sup>7</sup>.  
555 Recombination was induced using a single intra-peritoneal (IP) injection of 2mg tamoxifen for  
556 two consecutive days. A brief overview of each mouse line can be found in Table S1.

557

**Table S1. Description of mouse strains**

| Mouse strain                                  | Genotype                                                                           | Housing Location                                          | Description                                                                                             |
|-----------------------------------------------|------------------------------------------------------------------------------------|-----------------------------------------------------------|---------------------------------------------------------------------------------------------------------|
| wild type                                     | $Mcl1^{fl/fl} Vil1\text{-cre}^{wt/wt}$                                             | University of Zurich<br>University of Bern<br>(Germ Free) | Both <i>Mcl1</i> alleles are floxed but mice are Cre negative. No recombination of <i>Mcl1</i> .        |
| $Mcl1^{fl/wt} cre^{Tg/+}$                     | $Mcl1^{fl/wt} Vil1\text{-cre}^{tg/wt}$                                             | University of Zurich                                      | One floxed <i>Mcl1</i> allele and one wild type allele. Mice retain one wild type copy of <i>Mcl1</i> . |
| $Mcl1^{\Delta IEC}$                           | $Mcl1^{fl/fl} Vil1\text{-cre}^{tg/wt}$                                             | University of Zurich<br>University of Bern<br>(Germ Free) | Intestinal Epithelial Cell (IEC) specific deletion of <i>Mcl1</i>                                       |
| $Rag1^{-/-}$                                  | $Rag1^{-/-}$                                                                       | University of Zurich                                      | Immune deficient (lack conventional B and T cells)                                                      |
| $Mcl1^{\Delta IEC} Rag1^{-/-}$                | $Mcl1^{fl/fl} Vil1\text{-cre}^{tg/wt}$<br>$Rag1^{-/-}$                             | University of Zurich                                      | Immune deficient (lack conventional B and T cells)<br>IEC specific deletion of <i>Mcl1</i>              |
| i- $Mcl1^{\Delta IEC}$                        | $Mcl1^{fl/fl} Vil1\text{-cre-ER}^{T2}$                                             | CRUK Beatson<br>Institute                                 | Tamoxifen inducible IEC specific deletion of <i>Mcl1</i>                                                |
| i- $Apc^{\Delta IEC}$                         | $Apc^{fl/fl} Vil1\text{-cre-ER}^{T2}$                                              | CRUK Beatson<br>Institute                                 | Tamoxifen inducible IEC specific deletion of <i>Apc</i>                                                 |
| i- $Ctnnb1^{\Delta IEC/wt}$                   | $Ctnnb1^{fl/wt} Vil1\text{-Cre-ER}^{T2}$                                           | CRUK Beatson<br>Institute                                 | Tamoxifen inducible IEC specific deletion of one copy<br><i>Ctnnb1</i>                                  |
| i- $Ctnnb1^{\Delta IEC/wt} Mcl1^{\Delta IEC}$ | $Ctnnb1^{fl/wt} Vil1\text{-Cre-ER}^{T2}$<br>$Mcl1^{fl/fl} Vil1\text{-Cre-ER}^{T2}$ | CRUK Beatson<br>Institute                                 | Tamoxifen inducible IEC specific co-deletion of <i>Mcl1</i> and one copy of <i>Ctnnb1</i>               |
| i- $Apc^{\Delta IEC} Mcl1^{\Delta IEC}$       | $Apc^{fl/fl} Vil1\text{-Cre-ER}^{T2}$<br>$Mcl1^{fl/fl} Vil1\text{-Cre-ER}^{T2}$    | CRUK Beatson<br>Institute                                 | Tamoxifen inducible IEC specific co-deletion of <i>Mcl1</i> and <i>Apc</i>                              |
| $Mcl1^{\Delta IEC} Confetti^{tg/+}$           | $Mcl1^{fl/fl} Vil1\text{-cre}^{tg/wt}$<br>Confetti $Cre^{tg/wt}$                   | University of Zurich                                      | Genetic IEC specific co-deletion of <i>Mcl1</i> and expression of Confetti                              |



## 560 **In situ Hybridization**

561 RNA ISH was performed on FFPE tissues according to the manufacturer`s protocol using five  
562 commercially available probes. 1) A probe designated Mm-Mcl1 (by Advanced Cell  
563 Diagnostics (ACD); ACD catalog number #317241), and targeting nucleotides 495-1678 of  
564 murine Mcl1 gene. 2) A probe designated Mm-Lgr5 (by Advanced Cell Diagnostics (ACD);  
565 ACD catalog number #312171), and targeting nucleotides 2165-3082 of murine Lgr5 gene. 3)  
566 A probe designated Mm-Olfm4 (by Advanced Cell Diagnostics (ACD); ACD catalog number  
567 #311838), and targeting nucleotides 25-1043 of murine Olfm4 gene. 4) A probe designated  
568 Hs-MCL1 (by Advanced Cell Diagnostics (ACD); ACD catalog number #588851), and targeting  
569 nucleotides 1514-3532 of human Mcl1 gene. 5) A probe designated Hs-OLFM4 (by Advanced  
570 Cell Diagnostics (ACD); ACD catalog number #311048) targeting nucleotides 1111-2222 of  
571 human OLFM4 gene.

572

## 573 **Bacterial DNA isolation**

574 Bacterial DNA was isolated from stool samples that were previously stored at -80°C. DNA was  
575 isolated using the PureLink Microbiome DNA purification kit (Invitrogen, A29789) according to  
576 the manufacturer`s protocols.

577

## 578 **PCR for bacterial DNA**

579 The 16S PCR was performed as described previously<sup>8</sup> with some modifications. Reactions  
580 were performed in a final volume of 50 µl containing 10 ng of fecal DNA template<sup>9</sup>, 200 nM  
581 dNTP, 200 nM of each primer, 1 U HotStarTaq polymerase (Qiagen), and 1-fold CoralLoad  
582 PCR Buffer (Qiagen). “Universal” primers were used to amplify the genes encoding 16S rRNA  
583 from all bacterial groups: Forward primer (5'- ACTCCTACGGGAGGCAGCAGT -3') and  
584 reverse primer, (5'- ATTACCGCGGCTGCTGGC -3')<sup>8</sup>, resulting in an 197 bp amplicon. PCR  
585 assays were performed in a C1000 Touch Thermal Cycler (Biorad) using the following

586 program: 95°C for 5 min, then 25 cycles of 94°C for 60 sec, 55°C for 90 sec and 72°C for 60  
587 sec. These cycles were followed by 72°C for 10 minutes, and storage at 4°C. Amplified  
588 products were separated on a 2% (m/v) agarose (Invitrogen) gel in Tris/acetate/EDTA buffer  
589 (National diagnostics) containing 1-fold GelRed Nucleic Acid Gel Stain (Biotium).

590

### 591 **FISH for Bacterial 16s rRNA**

592 5µm tissue sections of paraffin-fixed colon samples were deparaffinated in xylol to ethanol  
593 baths in decreasing ratios. Tissue sections were permeabilized in hybridization buffer  
594 containing PBS 0.9M NaCl, 20mM Tris-HCl, and 0.1% sodium dodecyl sulfate for 10 mins at  
595 50°C. Hybridization was performed with an Alexafluor-647 labeled universal 16s rRNA  
596 bacterial probe (5'-[AF 647] GCTGCCTCCCGTAGGAGT-3'; Eurofin genomics, 10nM per  
597 section) diluted in hybridization buffer for 4 hours at 50°C, followed by two washing steps using  
598 the PBS 0.9M NaCl and 20mM Tris-HCl. DAPI was applied diluted in the washing buffer for 5  
599 mins at RT, followed by one washing step. Samples were mounted with Vectashield (Vector  
600 laboratories) and stored in the dark at 4°C. Images were recorded with an LCI laser scanning  
601 confocal microscope (Zeiss) or a panoramic 250 flash II scanner (3DHISTECH).

602

### 603 **Western blot**

604 Colon tissue was isolated from 2-month-old mice immediately after euthanasia and placed in  
605 ice-cold PBS containing phosphatase inhibitor cocktail tablets (PhosStop, Roche  
606 #04906837001) and protease inhibitor cocktail tablets (cOMplete EDTA-free tabs, Roche  
607 #11873580001). Intestinal tissue was opened longitudinally and the epithelial layer was  
608 scraped directly into 200µl of ice-cold complete RIPA lysis buffer. All antibodies used for  
609 western blot analysis can be found in Table S2. Samples were run on 4-20% Mini-PROTEAN®  
610 TGX Stain-Free™ gels (Bio-Rad Laboratories, #456-8093) and were developed using a  
611 ChemiDoc™ XRS+ imaging machine (Bio-Rad Laboratories) with Image Lab™ software.

612 **Organoid Isolation and Culturing**

613 In brief, small intestinal tissue was dissected, flushed with PBS and opened longitudinally, with  
614 villi and mucous layers then removed mechanically by scraping. The resulting intestinal  
615 samples were washed with PBS, incubated with 2mM EDTA at 4°C for 30 minutes followed by  
616 further washing and filtration through a 70µm mesh in order to isolate intestinal crypts. These  
617 isolated crypts were suspended in growth factor reduced Matrigel® (Corning), plated in 10-  
618 20µl droplets, and incubated at 37°C in 5% CO<sub>2</sub>. *i-Apc<sup>ΔIEC</sup>* or *i-Apc<sup>ΔIEC</sup>Mcl1<sup>ΔIEC</sup>* organoids were  
619 maintained in Advanced DMEM/F12 growth media (Thermo), supplemented with 2mM L-  
620 glutamine, 10mM HEPES, 12.5% (w/v) BSA, 100ng/ml murine NOGGIN, 50ng/ml murine EGF,  
621 and 1 x proprietary B27 and N2 supplements (Thermo). Wild type control or *i-Mcl1<sup>ΔIEC</sup>*  
622 organoids were maintained in the same media, supplemented with 0.5µg/ml murine R-  
623 SPONDIN1.

624

625

626

627

628

629

630

631

632

633

634

635

**Table S2. Table of antibodies**

| Antibody Name                                                                     | Company                   | Catalogue Number                |
|-----------------------------------------------------------------------------------|---------------------------|---------------------------------|
| Anti-CD90 / Thy1 antibody (IBL-6/23)                                              | Abcam                     | Cat# ab3105; RRID: AB_2287350   |
| Anti-MLKL (phospho S345) antibody                                                 | Abcam                     | Cat# ab196436; RRID: AB_2687465 |
| CDX2 antibody (EPR2764Y) (IHC)                                                    | Abcam                     | Cat# ab76541; RRID: AB_1523334  |
| Synaptophysin antibody (YE269) (IHC)                                              | Abcam                     | Cat# ab32127; RRID: AB_2286949  |
| BrdU antibody (IHC)                                                               | BD Biosciences            | Cat# 347580; RRID: AB_400326    |
| CD45R/B220 antibody (IHC)                                                         | Becton Dickinson          | Cat# 553084; RRID: AB_394614    |
| Rat Anti-Mouse F4 / 80 (Macrophages) Monoclonal Antibody (IHC)                    | BMA Biomedicals           | Cat# T-2006; RRID: AB_1227368   |
| BAK Antibody                                                                      | Cell Signaling Technology | Cat# 3814S; RRID: AB_2290287    |
| BAX Antibody                                                                      | Cell Signaling Technology | Cat# 2772S; RRID: AB_10695870   |
| BCL2 Antibody                                                                     | Cell Signaling Technology | Cat# 2876S; RRID: AB_2064177    |
| BCL-xL Antibody                                                                   | Cell Signaling Technology | Cat# 2762S; RRID: AB_329920     |
| BID Antibody (Mouse Specific)                                                     | Cell Signaling Technology | Cat# 2003S; RRID: AB_10694562   |
| BIM (C34C5) Rabbit mAb                                                            | Cell Signaling Technology | Cat# 2933S; RRID: AB_1030947    |
| Caspase-8 Antibody (Mouse Specific)                                               | Cell Signaling Technology | Cat# 4927S; RRID: AB_10694563   |
| Caspase-9 (C9) Mouse mAb                                                          | Cell Signaling Technology | Cat# 9508S; RRID: AB_2068620    |
| Cleaved Caspase-3 (Asp175) (5A1E) Rabbit mAb                                      | Cell Signaling Technology | Cat# 9664P; RRID: AB_2070042    |
| Cleaved Caspase-3 (Asp175) Antibody (IHC)                                         | Cell Signaling Technology | Cat# 9661; RRID: AB_2341188     |
| GAPDH (D16H11) XP Rabbit mAb antibody                                             | Cell Signaling Technology | Cat# 5174S; RRID: AB_10622025   |
| MCL1 (D35A5) Rabbit mAb                                                           | Cell Signaling Technology | Cat# 5453P; RRID: AB_10828726   |
| Olfm4 (D6Y5A) Rabbit mAb (Mouse Specific) (IHC)                                   | Cell Signaling Technology | Cat# 9718S; RRID: AB_2118009    |
| Pan-Keratin (C11) Mouse mAb                                                       | Cell Signaling Technology | Cat# 4545S; RRID: AB_490860     |
| PCNA (PC10) Mouse mAb                                                             | Cell Signaling Technology | Cat# 2586S; RRID: AB_2160343    |
| Rabbit Anti-beta-Catenin Monoclonal Antibody (IHC)                                | Cell Signaling Technology | Cat# 9582S; RRID: AB_823447     |
| Polyclonal Rabbit Anti-Cytokeratin (IHC)                                          | DAKO                      | Cat# Z0622; RRID: AB_2650434    |
| Polyclonal Rabbit Anti Human Lysozyme EC 3.2.1.17 antibody (IHC)                  | DAKO                      | Cat# A0099; RRID: AB_2341230    |
| SOX9 (EP317) Rabbit Monoclonal Antibody                                           | Epitomics                 | Cat# AC-0284RUO                 |
| Rabbit Anti-Human CD3 Monoclonal Antibody, Unconjugated, Clone SP7 (IHC)          | Lab Vision                | Cat# RM-9107-S; AB_149922       |
| Rabbit Anti-Human Ki67 (Ki-67) Monoclonal Antibody, Unconjugated, Clone SP6 (IHC) | Lab Vision                | Cat# RM-9106-S; RRID: AB_149707 |



|                                                                    |                             |                                       |
|--------------------------------------------------------------------|-----------------------------|---------------------------------------|
| Rabbit Anti-Gamma H2AX, phospho (Ser139) Polyclonal Antibody (IHC) | Novus Biologicals           | Cat# NB100-384;<br>RRID: AB_350295    |
| Rabbit Anti-MCL1 Antibody                                          | Rockland                    | Cat# 600-401-394;<br>RRID: AB_2266446 |
| CD44 (HCAM) (IM7) Antibody (IHC)                                   | Santa Cruz<br>Biotechnology | Cat# sc-18849;<br>RRID: AB_2074688    |
| MLKL Antibody (Y-14)                                               | Santa Cruz<br>Biotechnology | Cat# sc-165025;<br>RRID: AB_10839183  |
| Anti- $\alpha$ -Tubulin antibody, Mouse monoclonal                 | Sigma-Aldrich               | Cat# T8203-25UL;<br>RRID: AB_1841230  |
| Mouse Anti-Actin, alpha-Smooth Muscle Monoclonal Antibody (IHC)    | Sigma-Aldrich               | Cat# A2547; RRID:<br>AB_476701        |

637

638

639

640

641

642

643

644

645

646

647

648

649

650

651

652

653

654 **Histological Scoring**

655 Histological scoring was performed by a pathologist in a blinded fashion by analysing H&E  
656 stained slides from 2-month-old wild type control, *Mcl1*<sup>ΔIEC</sup>, *Rag1*<sup>-/-</sup> or *Mcl1*<sup>ΔIEC</sup>*Rag1*<sup>-/-</sup> mice.  
657 Histological scores were attributed independently to the small intestine and colon of each  
658 mouse. Histological scoring was based on architectural changes (crypt hyperplasia and  
659 villin/crypt ratio length), inflammatory changes (neutrophil and lymphoplasmocyte infiltration),  
660 epithelial damage (epithelial surface damage) and cell death (apoptosis) using a modified  
661 established scoring system <sup>10</sup> designed to discriminate between normal tissue (score = 0) and  
662 mild (score = 1), moderate (score = 2) or severe (score = 3) pathology. Detailed criteria for  
663 each category are provided in Table S3 and representative images of each scoring criteria are  
664 displayed as Supplementary Data 1. Histological score was determined using 5 mice per  
665 group.

666

667

668

669

670

671

672

673

674

675

676

677

**Table S3. Histological scoring criteria**

|                                                        | <b>Normal<br/>(score = 0)</b>                                                                                                     | <b>Mild<br/>(score = 1)</b>                                                                               | <b>Moderate<br/>(score = 2)</b>                                                                                                                                                                     | <b>Severe<br/>(score = 3)</b>                                                                                                                                                                        |
|--------------------------------------------------------|-----------------------------------------------------------------------------------------------------------------------------------|-----------------------------------------------------------------------------------------------------------|-----------------------------------------------------------------------------------------------------------------------------------------------------------------------------------------------------|------------------------------------------------------------------------------------------------------------------------------------------------------------------------------------------------------|
| <b><u>Architectural changes:</u></b>                   |                                                                                                                                   |                                                                                                           |                                                                                                                                                                                                     |                                                                                                                                                                                                      |
| <b>Crypt hyperplasia</b>                               | Parallel crypts separated with stroma                                                                                             | Increased amount, decreased diameter, elongation irregular shape of the crypts, enlarged epithelial cells | Increased amount, decreased diameter, elongation irregular shape of the crypts, crypts located "back to back", branched crypts, enlarged epithelial cells OR multi-layered epithelium in the crypts | Increased amount, decreased diameter, elongation irregular shape of the crypts, crypts located "back to back", branched crypts, enlarged epithelial cells AND multi-layered epithelium in the crypts |
| <b>Villi/crypt length ratio (small intestine only)</b> | Between 3:1 and 5:1                                                                                                               | Approximately 2:1                                                                                         | Approximately 1:1                                                                                                                                                                                   | Blunted or flat villi                                                                                                                                                                                |
| <b><u>Inflammatory changes:</u></b>                    |                                                                                                                                   |                                                                                                           |                                                                                                                                                                                                     |                                                                                                                                                                                                      |
| <b>Neutrophils</b>                                     | 0-3 cells per high power field                                                                                                    | 5-10 cells per high power field                                                                           | >10 cells per high power field                                                                                                                                                                      | Abscess                                                                                                                                                                                              |
| <b>Lymphoplasmocytes</b>                               | 1 lymphocyte per 4-5 epithelial cells within the crypt. discrete lymphoplasmocytes in lamina propria, isolated lymphoid follicles | Mildly increased amount of inflammatory cells in the epithelium or lamina propria,                        | Lamina propria expansion by a mixed inflammatory infiltrate, increased amount of lymphoid follicles                                                                                                 | Lamina propria expansion by a mixed inflammatory infiltrate, AND multiple or large reactive lymphoid follicles                                                                                       |
| <b><u>Epithelial damage</u></b>                        |                                                                                                                                   |                                                                                                           |                                                                                                                                                                                                     |                                                                                                                                                                                                      |
| <b>Superficial damage</b>                              | Normal epithelium                                                                                                                 | Changes in cytoplasm and nuclei (accumulation and vacuolization), goblet cells reduction                  | Changes in cytoplasm and nuclei (accumulation and vacuolization), goblet cells reduction AND isolated erosions                                                                                      | Changes in cytoplasm and nuclei (accumulation and vacuolization), goblet cells reduction AND multiple erosions or ulceration                                                                         |
| <b>Apoptosis</b>                                       | No apoptosis                                                                                                                      | Numerous apoptotic bodies in the crypt epithelium                                                         | Apoptotic bodies in the crypt's lumen                                                                                                                                                               | Dilated crypts with flattened epithelium (cystic dilated crypts)                                                                                                                                     |

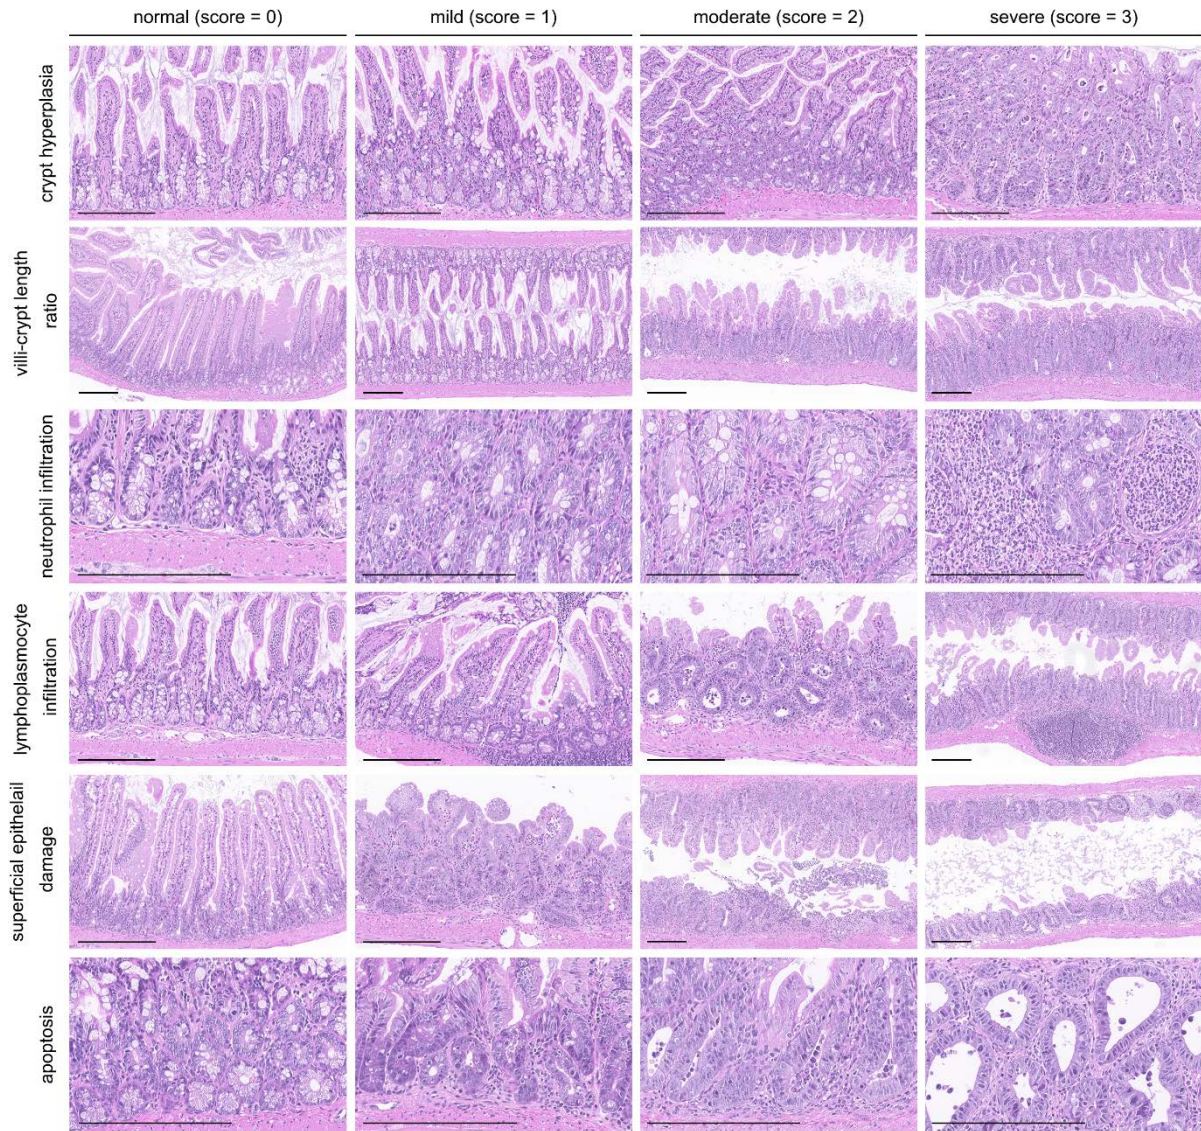

679

680 **Supplementary Data 1.** Representative H&E images of small intestine which illustrate the

681 criteria needed to be considered wild type (score = 0), mild (score = 1), moderate (score = 2)

682 or severe (score = 3) in relation to crypt hyperplasia, neutrophil or lymphoplasmacyte

683 infiltration, epithelial damage, villi-crypt length ratio and apoptosis during histological scoring

684 (200µm scale bar).

685

686

687

688



## 689 **Sanger Sequencing and Whole Exome Sequencing**

690 Genomic DNA was isolated from FFPE tissue blocks using Machery & Nagel's NucleoSpin  
691 FFPE Kit and analysed by either Sanger Sequencing or Whole Exome Sequencing. For both,  
692 regions of normal tissue, hyperplasia, low-grade hyperplasia, high-grade hyperplasia or  
693 carcinoma were identified based on previously described criteria <sup>11</sup>. For Sanger Sequencing,  
694 AmpliTaq Gold polymerase was used to amplify 296bp of the *Ctnnb1* gene (exon 2) following  
695 the manufacturer's recommendations (Primer sequences obtained from Huang et al. <sup>12</sup> fwd:  
696 5'- TACAGGTAGCATTTTCAGTTC AC -3'; rev: 5'- TAGCTTCCAAACACAAATGC -3'). PCR  
697 products were sequenced at Microsynth, Balgach, Switzerland. Sequences were aligned  
698 against the reference NC\_000075.6 (chr9:120950522-120950749 *Mus musculus* strain  
699 C57BL/6J). Codon changes were outlined according to transcript reference NM\_000076.5.

700 For array Comparative Genomic Hybridization (aCGH) and Synteny analysis, regions of  
701 healthy tissue, hyperplasia or carcinoma were identified based on previously described criteria  
702 <sup>11</sup>. Genomic DNA was isolated from FFPE tissue blocks using Macherey & Nagel's NucleoSpin  
703 FFPE Kit before aCGH and Synteny analysis were performed as previously described <sup>13</sup>.

704 Whole exome sequencing of tumor and non-tumor tissue was performed on genomic DNA  
705 isolated from formalin-fixed paraffin-embedded (FFPE) samples at Ontogenetic Corporations,  
706 Atlanta (GA, USA). Samples were chosen according to previously published criteria <sup>11, 14</sup> to  
707 distinguish between normal tissue, hyperplastic tissue, low grade adenoma, high grade  
708 adenoma and carcinoma. Tissue samples matching these criteria were punched out of the  
709 FFPE blocks and genomic DNA was extracted with the NucleoSpin FFPE kit (Macherey &  
710 Nagel). Sequencing data have been deposited at the European Nucleotide Archive under the  
711 accession number PRJEB20295.

712 Enrichment of the whole exome (Agilent SureSelect Mouse All Exon kit) and subsequent  
713 Illumina sequencing on a HighSeq2500 (125bp PE) was performed at Ontogenetic  
714 Corporations, Atlanta (GA, USA). Ontogenetic Corporations processed the sequence reads on  
715 the DNAnexus platform (Mountain View, CA, USA) using the advanced mouse exome analysis

716 pipeline. Quality filtered reads were aligned against the mouse reference genome  
 717 (GRCm38/mm10) using BWA<sup>15</sup>. After removing PCR duplicates (PicardTools: Mark duplicates  
 718 (Broad Institute)) GATK's Unified Genotyper was used to call variants after realignment and  
 719 base quality score recalibration <sup>16</sup>.

720 Raw variants were filtered based on GATK's recommendations. Variants were divided into  
 721 SNPs and INDELS to apply different parameters during the filtration step. For retaining SNPs  
 722 in the dataset the criteria were "QD > 2.0 & FS < 60.0 & MQ > 40.0 & MQRankSum > -12.5 &  
 723 ReadPosRankSum > -8.0". The selected INDELS have to fulfill "QD > 2.0 & FS < 200.0 &  
 724 ReadPosRankSum > -20.0" to be selected. Afterwards the SNP and INDEL dataset per sample  
 725 was combined and variant filtration steps for depth and genotype quality can be applied  
 726 (DP>=10; QUAL>=30). Variants were annotated and functional effects were predicted with  
 727 SNPEff <sup>17</sup>. The exome datasets were filtered for the WNT, TGF- $\beta$ , PI3K, RTK-RAS and P53  
 728 signaling pathways. A full list of target genes can be found in Table S4 to S9.

729 An exome coverage of 38.93x – 124.87x was achieved containing ~ 9000 – 15000 filtered  
 730 variants (see Table S7). This low level of variance in the whole exome was unsurprising, since  
 731 the strain used in this mouse model is of a pure inbred background (C57BL/6), as was used to  
 732 prepare the *Mus musculus* reference genome (for detailed information and discussion see  
 733 Fairfield 2015) <sup>18</sup>.

734

735 **Table S4.** Results after SNP calling by GATK's Unified Genotyper.

| <b>Sample</b>         | <b>coverage<br/>(exome)</b> | <b>Variants</b> | <b>n SNPs</b> | <b>n Insertions</b> | <b>n Deletions</b> | <b>n Complex</b> |
|-----------------------|-----------------------------|-----------------|---------------|---------------------|--------------------|------------------|
| Carcinoma 1 spf       | 48.72x                      | 20337           | 18100         | 526                 | 1690               | 21               |
| Carcinoma 2 spf       | 82.52x                      | 25047           | 22023         | 629                 | 2361               | 34               |
| Carcinoma 4 gf        | 109.09x                     | 28720           | 24509         | 1080                | 3053               | 78               |
| Mucosa, wt            | 124.87x                     | 18491           | 15245         | 600                 | 2615               | 31               |
| Hyperplasia/LGD 1 spf | 66.87x                      | 19465           | 16769         | 621                 | 2045               | 30               |
| Carcinoma 3 spf       | 78.45x                      | 21328           | 18284         | 694                 | 2321               | 29               |
| Carcinoma 5 gf        | 38.93x                      | 18920           | 16627         | 629                 | 1647               | 17               |
| Hyperplasia/LGD 2 gf  | 70.18x                      | 24584           | 21150         | 842                 | 2543               | 49               |

736

737 **Table S5.** Variant statistics after individual filtration of SNPs and INDELs (parameters are  
 738 mentioned in the text).

| <b>Sample</b>         | <b>coverage<br/>(exome)</b> | <b>Variants</b> | <b>n SNPs</b> | <b>n Insertions</b> | <b>n Deletions</b> | <b>n Complex</b> |
|-----------------------|-----------------------------|-----------------|---------------|---------------------|--------------------|------------------|
| Carcinoma 1 spf       | 48.72x                      | 11034           | 9319          | 338                 | 1359               | 18               |
| Carcinoma 2 spf       | 82.52x                      | 13334           | 10998         | 397                 | 1913               | 26               |
| Carcinoma 4 gf        | 109.09x                     | 15429           | 12308         | 677                 | 2382               | 62               |
| Mucosa, wt            | 124.87x                     | 11388           | 8679          | 454                 | 2233               | 22               |
| Hyperplasia/LGD 1 spf | 66.87x                      | 12576           | 10329         | 474                 | 1746               | 27               |
| Carcinoma 3 spf       | 78.45x                      | 13730           | 11200         | 530                 | 1975               | 25               |
| Carcinoma 5 gf        | 38.93x                      | 9189            | 7600          | 337                 | 1238               | 14               |
| Hyperplasia/LGD 2 gf  | 70.18x                      | 12457           | 9966          | 506                 | 1950               | 35               |

739

740 **Table S6.** Variants after applying the filters for depth and genotype quality (DP  
 741  $\geq 10$ , QUAL  $\geq 30$ ).

| <b>Sample</b>         | <b>coverage<br/>(exome)</b> | <b>Variants</b> | <b>n SNPs</b> | <b>n Insertions</b> | <b>n Deletions</b> | <b>n Complex</b> |
|-----------------------|-----------------------------|-----------------|---------------|---------------------|--------------------|------------------|
| Carcinoma 1 spf       | 48.72x                      | 9199            | 7532          | 323                 | 1326               | 18               |
| Carcinoma 2 spf       | 82.52x                      | 11332           | 9047          | 380                 | 1879               | 26               |
| Carcinoma 4 gf        | 109.09x                     | 13651           | 10578         | 667                 | 2344               | 62               |
| Mucosa, wt            | 124.87x                     | 10136           | 7457          | 445                 | 2212               | 22               |
| Hyperplasia/LGD 1 spf | 66.87x                      | 10992           | 8800          | 458                 | 1707               | 27               |
| Carcinoma 3 spf       | 78.45x                      | 12042           | 9554          | 515                 | 1948               | 25               |
| Carcinoma 5 gf        | 38.93x                      | 7949            | 6406          | 323                 | 1206               | 14               |
| Hyperplasia/LGD 2 gf  | 70.18x                      | 11057           | 8617          | 489                 | 1916               | 35               |

742

| Chr                                 | Start     | End       | Gene          | Length | Strand | Name                                                             |
|-------------------------------------|-----------|-----------|---------------|--------|--------|------------------------------------------------------------------|
| <b>WNT signalling pathway</b>       |           |           |               |        |        |                                                                  |
| 19                                  | 30545863  | 30549665  | <i>Dkk1</i>   | 3802   | -      | dickkopf WNT signaling pathway inhibitor 1                       |
| 3                                   | 132085292 | 132180304 | <i>Dkk2</i>   | 95012  | -      | dickkopf WNT signaling pathway inhibitor 2                       |
| 7                                   | 112116017 | 112159057 | <i>Dkk3</i>   | 43040  | -      | dickkopf WNT signaling pathway inhibitor 3                       |
| 8                                   | 22624043  | 22627547  | <i>Dkk4</i>   | 3504   | +      | dickkopf WNT signaling pathway inhibitor 4                       |
| 19                                  | 3584828   | 3686564   | <i>Lrp5</i>   | 101736 | -      | low density lipoprotein receptor-related protein 5               |
| 6                                   | 134446476 | 134566965 | <i>Lrp6</i>   | 120489 | -      | low density lipoprotein receptor-related protein 6               |
| 5                                   | 128600844 | 128604093 | <i>Fzd10</i>  | 3249   | -      | frizzled class receptor 10                                       |
| X                                   | 95420318  | 95444872  | <i>Amer1</i>  | 24554  | -      | APC membrane recruitment 1 (Fam123b)                             |
| 11                                  | 108920349 | 108950783 | <i>Axin2</i>  | 30434  | +      | axin 2                                                           |
| 18                                  | 34220924  | 34318608  | <i>Apc</i>    | 97684  | +      | adenomatosis polyposis coli                                      |
| 9                                   | 120929216 | 120960507 | <i>Ctnnb1</i> | 31291  | +      | catenin (cadherin associated protein), beta 1                    |
| 19                                  | 55741820  | 55933654  | <i>Tcf7l2</i> | 191834 | +      | transcription factor 7 like 2, T cell specific, HMG box          |
| 3                                   | 84815268  | 84979198  | <i>Fbxw7</i>  | 163930 | +      | F-box and WD-40 domain protein 7                                 |
| 4                                   | 133679008 | 133756769 | <i>Arid1a</i> | 77761  | -      | AT-rich interactive domain-containing protein 1A                 |
| 11                                  | 52252371  | 52283014  | <i>Tcf</i>    | 30643  | -      | transcription factor 7, T cell specific                          |
| 15                                  | 61985391  | 61990374  | <i>Myc</i>    | 4983   | +      | myelocytomatosis oncogene                                        |
| 3                                   | 131110471 | 131224356 | <i>Lef1</i>   | 113885 | -      | lymphoid enhancer binding factor 1                               |
| 5                                   | 144767732 | 144859778 | <i>Trrap</i>  | 92046  | +      | transformation/transcription domain-associated protein           |
| 6                                   | 72626378  | 72789254  | <i>Tcf7l1</i> | 162876 | -      | transcription factor 7 like 1 (T cell specific, HMG box)         |
| <b>TGF-beta signalling</b>          |           |           |               |        |        |                                                                  |
| 4                                   | 47353222  | 47414931  | <i>Tgfr1</i>  | 61709  | +      | transforming growth factor, beta receptor I                      |
| 9                                   | 116087698 | 116175363 | <i>Tgfr2</i>  | 87665  | -      | transforming growth factor, beta receptor II                     |
| 2                                   | 48814109  | 48903269  | <i>Acvr2a</i> | 89160  | +      | activin receptor IIA                                             |
| 15                                  | 101174067 | 101213679 | <i>Acvr1b</i> | 39612  | +      | activin A receptor, type 1B                                      |
| 18                                  | 76241580  | 76305731  | <i>Smad2</i>  | 64151  | +      | SMAD family member 2                                             |
| 9                                   | 63646767  | 63757994  | <i>Smad3</i>  | 111227 | -      | SMAD family member 3                                             |
| 18                                  | 73639009  | 73703780  | <i>Smad4</i>  | 64771  | -      | SMAD family member 4                                             |
| <b>PI3K signalling</b>              |           |           |               |        |        |                                                                  |
| 7                                   | 142650766 | 142666816 | <i>Igf2</i>   | 16050  | +      | insulin-like growth factor 2                                     |
| 7                                   | 67952827  | 68233668  | <i>Igf1r</i>  | 280841 | +      | insulin-like growth factor I receptor                            |
| 8                                   | 10984681  | 11008458  | <i>Irs2</i>   | 23777  | -      | insulin receptor substrate 2                                     |
| 13                                  | 101680563 | 101768217 | <i>Pik3r1</i> | 87654  | -      | phosphatidylinositol 3-kinase, regulatory subunit, polypeptide 1 |
| 3                                   | 32397671  | 32466107  | <i>Pik3ca</i> | 68436  | +      | phosphatidylinositol 3-kinase, catalytic, alpha polypeptide      |
| 19                                  | 32757497  | 32826160  | <i>Pten</i>   | 68663  | +      | phosphatase and tensin homolog                                   |
| <b>RTK-RAS signalling</b>           |           |           |               |        |        |                                                                  |
| 11                                  | 98412470  | 98437716  | <i>ErbB2</i>  | 25246  | +      | erb-b2 receptor tyrosine kinase 2                                |
| 10                                  | 128567523 | 128589652 | <i>ErbB3</i>  | 22129  | -      | erb-b2 receptor tyrosine kinase 3                                |
| 6                                   | 145216699 | 145250239 | <i>Kras</i>   | 33540  | -      | Kirsten rat sarcoma viral oncogene homolog                       |
| 3                                   | 103058285 | 103067914 | <i>Nras</i>   | 9629   | +      | neuroblastoma ras oncogene                                       |
| 6                                   | 39603237  | 39725463  | <i>Braf</i>   | 122226 | -      | Braf transforming gene                                           |
| 5                                   | 142484839 | 142551098 | <i>Radil</i>  | 66259  | -      | Ras association and DIL domains                                  |
| <b>P53 signalling</b>               |           |           |               |        |        |                                                                  |
| 11                                  | 69580359  | 69591873  | <i>Trp53</i>  | 11514  | +      | transformation related protein 53                                |
| 9                                   | 53439149  | 53536740  | <i>Atm</i>    | 97591  | -      | ataxia telangiectasia mutated                                    |
| <b>additional genes of interest</b> |           |           |               |        |        |                                                                  |
| 5                                   | 116439275 | 116591817 | <i>Srrm4</i>  | 152542 | -      | serine/arginine repetitive matrix 4                              |
| 6                                   | 39592574  | 39603382  | <i>Ndufb2</i> | 10808  | +      | NADH dehydrogenase (ubiquinone) 1 beta subcomplex, 2             |
| 6                                   | 64729125  | 64731245  | <i>Atoh1</i>  | 2120   | +      | atonal bHLH transcription factor 1                               |
| 7                                   | 83642825  | 83745726  | <i>Il16</i>   | 102901 | -      | interleukin 16                                                   |
| 9                                   | 106892825 | 107231909 | <i>Dock3</i>  | 339084 | -      | dedicator of cyto-kinesis 3                                      |
| 15                                  | 81585351  | 81652077  | <i>Ep300</i>  | 66726  | +      | E1A binding protein p300                                         |
| 11                                  | 112782224 | 112787760 | <i>Sox9</i>   | 5536   | +      | SRY (sex determining region Y)-box 9                             |
| 5                                   | 110286306 | 110337474 | <i>Pole</i>   | 51168  | +      | polymerase (DNA directed), epsilon                               |
| 9                                   | 111228228 | 111271791 | <i>Mlh1</i>   | 43563  | -      | mutL homolog 1                                                   |
| 12                                  | 85234529  | 85270591  | <i>Mlh3</i>   | 36062  | -      | mutL homolog 3                                                   |
| 17                                  | 87672330  | 87723713  | <i>Msh2</i>   | 51383  | +      | mutS homolog 2                                                   |
| 13                                  | 92211872  | 92355003  | <i>Msh3</i>   | 143131 | -      | mutS homolog 3                                                   |
| 17                                  | 87975050  | 87990883  | <i>Msh6</i>   | 15833  | +      | mutS homolog 6                                                   |
| 5                                   | 143909964 | 143933968 | <i>Pms2</i>   | 24004  | +      | postmeiotic segregation increased 2 ( <i>S. cerevisiae</i> )     |

| Gene          | Chr:Pos         | REF    | ALT | Codon variant            | Functional Variant | Functional Consequence            | Ensembl Transcript   | rs ID       | Mucosa, wt    | Hyperplasia /LGD 1 spf | Hyperplasia /LGD 2 gf | Carcinoma 1 spf | Carcinoma 2 spf | Carcinoma 3 spf | Carcinoma 4 gf | Carcinoma 5 gf |
|---------------|-----------------|--------|-----|--------------------------|--------------------|-----------------------------------|----------------------|-------------|---------------|------------------------|-----------------------|-----------------|-----------------|-----------------|----------------|----------------|
| <i>ErbB3</i>  | chr10:128570846 | T      | C   | c.3192+90A>G             |                    | intron_variant(MODIFIER)          |                      |             |               |                        |                       | 0/1:7:3:10      |                 |                 |                |                |
| <i>ErbB3</i>  | chr10:128571949 | T      | C   | c.2687-158A>G            |                    | intron_variant(MODIFIER)          |                      |             |               |                        |                       | 0/1:13:4:17     |                 |                 |                |                |
| <i>ErbB3</i>  | chr10:128575875 | CAT    | C   | T                        |                    | intron_variant(MODIFIER)          | ENSMUST00000082069   | rs228017517 |               | 0/1:35:13:49           | 0/1:18:11:30          | 0/1:3:10:15     | 0/1:0:10:58     | 0/1:26:14:41    | 0/1:0:11:89    | 0/1:12:11:24   |
| <i>ErbB3</i>  | chr10:128584505 | T      | A   | c.422-69A>T              |                    | intron_variant(MODIFIER)          |                      |             |               |                        |                       |                 |                 |                 |                | 0/1:9:4:13     |
| <i>ErbB3</i>  | chr10:128584507 | C      | A   | c.422-71G>T              |                    | intron_variant(MODIFIER)          |                      |             |               |                        |                       |                 |                 |                 |                | 0/1:10:4:14    |
| <i>ZNF2</i>   | chr11:108931615 | CG     | C   | c.956+37delG             |                    | intron_variant(MODIFIER)          | ENSMUST00000082915   |             | 0/1:41:16:61  |                        |                       |                 |                 |                 |                |                |
| <i>SOX9</i>   | chr11:112785794 | GC     | C   | c.432-14delC             |                    | intron_variant(MODIFIER)          | ENSMUST00000000579   |             | 0/1:9:6:20    |                        |                       |                 |                 |                 |                |                |
| <i>Msh3</i>   | chr13:92306459  | CT     | C   | -                        |                    | downstream_gene_variant(MODIFIER) | ENSMUST00000190462   |             | 0/1:0:6:66    | 0/1:10:17:35           | 0/1:21:12:45          |                 |                 |                 |                |                |
| <i>Erbp30</i> | chr15:81623853  | AT     | A   | c.134+29delT             |                    | intron_variant(MODIFIER)          | ENSMUST00000068387   | rs237317619 | 0/1:0:8:206   |                        | 0/1:35:21:78          |                 |                 | 0/1:18:12:41    | 0/1:29:28:77   | 0/1:12:12:31   |
| <i>Erbp30</i> | chr15:81636274  | CT     | C   | c.3725+41delT            |                    | intron_variant(MODIFIER)          | ENSMUST00000000079   | rs255017404 | 0/1:18:29:51  |                        | 0/1:0:11:126          |                 |                 | 0/1:0:10:155    |                | 0/1:39:12:54   |
| <i>Msh2</i>   | chr17:87679692  | TA     | T   | c.367-107delA            |                    | intron_variant(MODIFIER)          | ENSMUST000000024867  |             |               | 0/1:17:20:40           |                       |                 |                 |                 |                |                |
| <i>Apc</i>    | chr18:34312747  | C      | T   | c.2895C>T                | p.Gln898*          | stop_gained(HIGHCONSEQUENCE)      | ENSMUST00000007962   | rs47505115  | 0/1:50:52:102 | 0/1:32:20:52           | 0/1:27:23:50          |                 |                 | 0/1:38:41:79    |                |                |
| <i>Apc</i>    | chr18:34316309  | A      | G   | c.6257A>G                | p.Asp2096G         | missense_variant(MODERATE)        | ENSMUST000000007962  | rs47505115  | 0/1:50:52:102 | 0/1:32:20:52           | 0/1:27:23:50          |                 |                 | 0/1:37:32:69    |                | 0/1:22:18:40   |
| <i>Lp5</i>    | chr19:3659357   | C      | T   | c.372G>A                 | p.Thr124Thr        | synonymous_variant(LOWSEQUENCE)   | ENSMUST00000176867   |             |               | 0/1:19:21:40           |                       |                 |                 |                 |                |                |
| <i>Acrv2a</i> | chr2:4893385    | CT     | C   | c.817-121delT            |                    | intron_variant(MODIFIER)          | ENSMUST00000063868   | rs233268672 | 0/1:14:17:42  |                        |                       |                 |                 | 0/1:17:11:32    | 0/1:12:13:28   |                |
| <i>Pik3ca</i> | chr3:32440553   | A      | T   | c.1060-95_1060-94delGT   |                    | intron_variant(MODIFIER)          | ENSMUST000000029201  | rs231243003 |               | 0/1:4:6:10             |                       | 1/1:2:13:15     |                 |                 |                |                |
| <i>Pik3ca</i> | chr3:32449854   | CT     | C   | c.1060-74A>T             |                    | intron_variant(MODIFIER)          |                      |             |               |                        |                       |                 | 0/1:31:11:42    |                 |                |                |
| <i>Pik3ca</i> | chr3:32449854   | CT     | C   | c.1747-54delT            |                    | intron_variant(MODIFIER)          |                      |             |               | 0/1:22:9:32            |                       |                 | 0/1:28:12:45    |                 |                |                |
| <i>Fbxw7</i>  | chr3:84903756   | A      | G   | c.187A>G                 | p.Asn63Asp         | missense_variant(MODERATE)        | ENSMUST00000107678   | rs3683473   |               | 1/1:1:19:20            |                       |                 |                 |                 | 1/1:1:33:34    |                |
| <i>Fbxw7</i>  | chr3:84903911   | A      | G   | c.342A>G                 | p.Glu114Glu        | synonymous_variant(LOWSEQUENCE)   | ENSMUST00000107678   | rs3684554   |               |                        |                       |                 | 1/1:1:22:23     |                 | 1/1:2:75:77    |                |
| <i>Fbxw7</i>  | chr3:84954904   | A      | G   | c.540A>G                 | p.Glu180Glu        | synonymous_variant(LOWSEQUENCE)   | ENSMUST00000107678   | rs30008104  |               |                        |                       |                 |                 |                 |                |                |
| <i>Fbxw7</i>  | chr3:84967383   | AT     | A   | A                        |                    | intron_variant(MODIFIER)          | ENSMUST00000107678   | rs231049948 | 0/1:42        | 0/1:32                 | 0/1:2:39              | 0/2:16          |                 |                 |                | 0/2:15         |
| <i>Fbxw7</i>  | chr3:84977650   | GA     | G   | c.110delA                |                    | 3_prime_UTR_variant(MODIFIER)     | ENSMUST00000107678   | rs238194117 |               |                        |                       |                 |                 | 1/1:2:22:33     | 1/1:3:31:39    | 1/1:1:12:18    |
| <i>Nras</i>   | chr3:103063308  | G      | GTT | c.451-21_451-20insTT     |                    | intron_variant(MODIFIER)          | ENSMUST00000029445   | rs242625067 |               |                        |                       |                 |                 | 0/1:26:16:46    | 0/1:29:15:58   |                |
| <i>Lef1</i>   | chr3:131189251  | GT     | GTT | c.871-83delT             |                    | intron_variant(MODIFIER)          | ENSMUST00000098611   | rs242625067 | 0/1:43        |                        | 0/1:31                |                 |                 |                 |                |                |
| <i>And1a</i>  | chr4:133689170  | ATATAC | A   | c.2081A>C                | p.Gln1096fs        | frameshift_variant(HIGH)          | ENSMUST00000007296   | rs263841953 |               | 0/1:62:24:88           |                       |                 | 0/1:9:4:13      |                 |                |                |
| <i>Pole</i>   | chr5:110293954  | A      | C   | c.801+159A>C             |                    | intron_variant(MODIFIER)          | ENSMUST000000007296  | rs263841953 |               |                        |                       |                 |                 |                 |                |                |
| <i>Pole</i>   | chr5:110299343  | A      | C   | c.2081A>C                | p.Lys694Thr        | missense_variant(MODERATE)        | ENSMUST000000007296  | rs263841953 |               |                        |                       |                 |                 |                 |                |                |
| <i>Srrm4</i>  | chr5:116467875  | GGA    | G   | n.187+9899delG           |                    | upstream_gene_variant(MODIFIER)   | ENSMUST00000126953   | rs257407124 |               |                        |                       |                 |                 | 0/1:4:6:13      |                |                |
| <i>Srrm4</i>  | chr5:142544859  | CAG    | C   | c.23+32_23+33delCT       |                    | intron_variant(MODIFIER)          | ENSMUST00000085758   |             |               | 0/1:8:14:52            |                       |                 |                 |                 |                |                |
| <i>Trrap</i>  | chr5:144780182  | C      | T   | c.450+129C>T             |                    | intron_variant(MODIFIER)          | ENSMUST0000000085758 |             |               |                        |                       | 0/1:23:8:31     |                 |                 |                |                |
| <i>Trrap</i>  | chr5:144780196  | C      | T   | c.450+129C>T             |                    | intron_variant(MODIFIER)          | ENSMUST0000000085758 |             |               |                        |                       | 0/1:17:6:23     |                 |                 |                |                |
| <i>Trrap</i>  | chr5:144780210  | C      | T   | c.450+143C>T             |                    | intron_variant(MODIFIER)          | ENSMUST0000000085758 |             |               |                        |                       | 0/1:12:5:18     |                 |                 |                |                |
| <i>Ndufb2</i> | chr6:39596677   | AT     | A   | n.364+83delT             |                    | intron_variant(MODIFIER)          | ENSMUST00000024900   | rs239777375 |               |                        |                       |                 |                 |                 |                | 0/1:9:6:21     |
| <i>Ndufb2</i> | chr6:39598377   | GT     | GTT | n.460+18_460+19insT      |                    | intron_variant(MODIFIER)          | ENSMUST00000024900   | rs249436801 |               |                        |                       |                 |                 |                 |                | 0/2:42         |
| <i>Braf</i>   | chr6:39648311   | GAA    | GGA | c.1123+137_1123+138delTT |                    | intron_variant(MODIFIER)          | ENSMUST00000101497   | rs216953796 |               | 0/2:33                 |                       |                 |                 | 0/2:31          | 0/1:46         |                |
| <i>Braf</i>   | chr6:39648327   | G      | A   | c.1123+123C>T            |                    | intron_variant(MODIFIER)          | ENSMUST00000101497   | rs216953796 |               | 0/1:27:5:32            | 0/1:33:8:41           |                 |                 |                 |                |                |
| <i>Dock3</i>  | chr8:108929844  | TCA    | T   | c.4107+74_4107+75delTG   |                    | intron_variant(MODIFIER)          | ENSMUST00000044532   | rs256120015 | 0/1:25:13:45  | 0/1:8:7:18             | 0/1:7:7:16            |                 | 0/1:23:9:38     |                 | 0/1:29:14:45   | 0/1:6:6:17     |
| <i>Mln1</i>   | chr9:11253013   | CA     | C   | n.694+2614delT           |                    | intron_variant(MODIFIER)          | ENSMUST00000155218   |             | 0/1:59:25:110 | 0/1:39:19:74           |                       |                 | 0/1:30:20:65    |                 | 0/1:0:7:141    |                |
| <i>Ctmb1</i>  | chr9:120950606  | C      | A   | c.98C>A                  | p.Ser33Tyr         | missense_variant(MODERATE)        | ENSMUST00000145093   |             |               |                        |                       |                 |                 |                 |                |                |
| <i>Ctmb1</i>  | chr9:120950630  | C      | T   | c.122C>T                 | p.Thr41Ile         | missense_variant(MODERATE)        | ENSMUST00000145093   |             |               |                        |                       |                 |                 |                 |                |                |
| <i>Ctmb1</i>  | chr9:120950642  | C      | T   | c.134C>T                 | p.Ser45Phe         | missense_variant(MODERATE)        | ENSMUST00000145093   |             |               |                        |                       | 0/1:23:14:37    |                 |                 |                |                |

**Table S8.** Identified variants per sample within the gene regions of interest. Variants were filtered to a depth of 10 and genotype quality of 30.



768 The clinical significance of particular SNV was determined by searching several databases.  
 769 After annotation we checked UniProt<sup>19</sup> for functional consequences of an amino acid change.  
 770 Additionally, we performed a protein BLAST to identify the homologous protein and position of  
 771 the functional change in humans to check the clinical association in the COSMIC database <sup>20</sup>.

772

773 **Table S9.** Classification of functional consequences of detected amino acid changes.

| Gene          | Chr:Pos        | REF    | ALT | Codon variant       | Functional Variant | Functional Consequence               | UniProt                                                   | BLAST human (homolog position)    | COSMIC Annotation       |
|---------------|----------------|--------|-----|---------------------|--------------------|--------------------------------------|-----------------------------------------------------------|-----------------------------------|-------------------------|
| <i>Apc</i>    | chr18:34312747 | C      | T   | c.2695C>T           | p.Gln899*          | stop_gained(HIGH NONSENSE)           | -                                                         | Q901*                             | Pathogenic (score 0.91) |
| <i>Apc</i>    | chr18:34316309 | A      | G   | c.6257A>G           | p.Asp2086Gly       | missense_variant(MODERATE)           | no functional significance                                | D2087G                            | not annotated           |
| <i>Fbxw7</i>  | chr3:84903756  | A      | G   | c.187A>G            | p.Asn63Asp         | missense_variant(MODERATE  MISSENSE) | no functional significance                                | without homology at this position | not annotated           |
| <i>Fbxw7</i>  | chr3:84903911  | A      | G   | c.342A>G            | p.Glu114Glu        | synonymous_variant(LOW  SILENT)      | no functional significance                                | E114E                             | not annotated           |
| <i>Fbxw7</i>  | chr3:84954904  | A      | G   | c.540A>G            | p.Glu180Glu        | synonymous_variant(LOW  SILENT)      | no functional significance                                | E180E                             | not annotated           |
| <i>Pole</i>   | chr5:110299343 | A      | C   | c.2081A>C           | p.Lys694Thr        | missense_variant(MODERATE  MISSENSE) | no record                                                 | K694T                             | not annotated           |
| <i>Arid1a</i> | chr4:133689170 | ATATAC | A   | c.3289_3293delTATAC | p.Gln1096fs        | synonymous_variant(LOW  SILENT)      | no record                                                 | Q1096fs                           | not annotated           |
| <i>Ctnnb1</i> | chr9:120950606 | C      | A   | c.98C>A             | p.Ser33Tyr         | missense_variant(MODERATE  MISSENSE) | target for HIPK2 phosphorylation/ proteasomal degradation | S33Y                              | Pathogenic (score 0.97) |
| <i>Ctnnb1</i> | chr9:120950630 | C      | T   | c.122C>T            | p.Thr41Ile         | missense_variant(MODERATE  MISSENSE) | target for GSK3 phosphorylation                           | T41I                              | Pathogenic (score 0.98) |
| <i>Ctnnb1</i> | chr9:120950642 | C      | T   | c.134C>T            | p.Ser45Phe         | missense_variant(MODERATE  MISSENSE) | target for secondary GSK3 phosphorylation                 | S45F                              | Pathogenic (score 0.98) |

774

775

776

777

778

779

780

781

782

783 **Single molecule FISH (smFISH)**

784 Mice were sacrificed and the small intestine was removed and flushed with cold PBS. Small  
785 intestine tissue was opened longitudinally and spread on whatman filter paper. Flat tissue was  
786 then fixed in 4% paraformaldehyde (PFA, Santa Cruz Biotechnology, sc-281692) in PBS for 3  
787 hours and subsequently incubated in a 30% sucrose, 4% PFA in PBS solution at 4°C overnight  
788 with gentle agitation. Fixed tissues were then embedded in Tissue-Tek OCT Compound  
789 (Sakura, 4583) and stored at -80°C. 7µm thick sections of fixed tissue were sectioned onto  
790 poly L-lysine coated coverslips and used for smFISH staining. Probe libraries were designed  
791 using the Stellaris FISH Probe Design Software (Biosearch Technologies), see Tables S10-  
792 S12 for complete list of smFISH probes. Probe libraries were coupled to Cy5 (*Mcl1*) or  
793 Alexa594 (*Atoh1* or *Wnt2b*). Tissue sections were hybridized with smFISH probe sets based  
794 on a previously published protocol<sup>21</sup>. smFISH imaging was performed on a Leica THUNDER  
795 Imager 3D Cell Imaging system using the following THUNDER Computational Clearing  
796 Settings, Feature Scale (nm): 383, Strength (%): 97.75, Deconvolution settings: Auto and  
797 Optimization: High. Objective: 100X/1.4. Quantification of smFISH was performed as  
798 previously described using the TransQuant software<sup>22</sup>. *Atoh1* smFISH quantification was  
799 performed by selecting 7 *Mcl1* expressing and 7 *Mcl1* deficient crypts from the small intestines  
800 of 3 different *Mcl1*<sup>ΔIEC</sup> mice. Individual epithelial cells were identified within each crypt and  
801 quantification was performed by determining the amount of single RNA molecules per epithelial  
802 cell.

803

804

805

806

807

808

**Table S10. *Mcl1* probes for smFISH**

| <b><i>Mcl1</i></b>   |                        |
|----------------------|------------------------|
| mus_ <i>Mcl1</i> _1  | caggccaaacatggtcggac   |
| mus_ <i>Mcl1</i> _2  | tacaggttcaagccgatgac   |
| mus_ <i>Mcl1</i> _3  | caagtagcgcgagatgatct   |
| mus_ <i>Mcl1</i> _4  | atcgcccttcgtttttaatgt  |
| mus_ <i>Mcl1</i> _5  | agtttgttacgccatctttg   |
| mus_ <i>Mcl1</i> _6  | attgcactcacaaggctatc   |
| mus_ <i>Mcl1</i> _7  | tggctggagctttaagagtc   |
| mus_ <i>Mcl1</i> _8  | cacatgttttcacagatgca   |
| mus_ <i>Mcl1</i> _9  | cagacagtgactcttccagg   |
| mus_ <i>Mcl1</i> _10 | cactctgagcagagtaatgg   |
| mus_ <i>Mcl1</i> _11 | ttctagtcacatcgtttggtga |
| mus_ <i>Mcl1</i> _12 | acagggctaaaagtcctgag   |
| mus_ <i>Mcl1</i> _13 | tcaagtactttttggccatc   |
| mus_ <i>Mcl1</i> _14 | aatcgaggctgttcagtttt   |
| mus_ <i>Mcl1</i> _15 | aggctctgcatatacactag   |
| mus_ <i>Mcl1</i> _16 | ccctgcatagttataaatct   |
| mus_ <i>Mcl1</i> _17 | tcttacatctatctacctgt   |
| mus_ <i>Mcl1</i> _18 | tgtaagtcaacaggggatca   |
| mus_ <i>Mcl1</i> _19 | taagactctagcctgcttta   |
| mus_ <i>Mcl1</i> _20 | taaaccagtgatagcacc     |
| mus_ <i>Mcl1</i> _21 | caccaggtataaacttgtgt   |
| mus_ <i>Mcl1</i> _22 | cttggcaatccttagtagac   |
| mus_ <i>Mcl1</i> _23 | acgccaacagtaaaggaagt   |
| mus_ <i>Mcl1</i> _24 | ataggggaactgggagcata   |
| mus_ <i>Mcl1</i> _25 | gggaggaagtgtagacgact   |
| mus_ <i>Mcl1</i> _26 | aaaatggccagtgaagagca   |
| mus_ <i>Mcl1</i> _27 | ggctcaaagagcaagtgttc   |
| mus_ <i>Mcl1</i> _28 | gtaacaatggaaagcatgcc   |
| mus_ <i>Mcl1</i> _29 | ggaccttgatgtttttctt    |
| mus_ <i>Mcl1</i> _30 | ccaacctttgaaattcccaa   |
| mus_ <i>Mcl1</i> _31 | acacagtcatactggagca    |
| mus_ <i>Mcl1</i> _32 | tttgtaaccgagtttagca    |
| mus_ <i>Mcl1</i> _33 | aataccttcagttaccagtg   |
| mus_ <i>Mcl1</i> _34 | gattcctgcctatttttatc   |
| mus_ <i>Mcl1</i> _35 | acttcttccctattacattc   |
| mus_ <i>Mcl1</i> _36 | caggtacaaatcactcccaa   |
| mus_ <i>Mcl1</i> _37 | aagtgctctgaagtccgaag   |
| mus_ <i>Mcl1</i> _38 | agaggctaaccttttagtca   |
| mus_ <i>Mcl1</i> _39 | gaagtcaggctcctagtaaa   |
| mus_ <i>Mcl1</i> _40 | ttcatttcaccctttgtgag   |
| mus_ <i>Mcl1</i> _41 | ccctggacctaaaataccta   |
| mus_ <i>Mcl1</i> _42 | catctagtcagcactcagac   |
| mus_ <i>Mcl1</i> _43 | gatgcttgaagactgcatgt   |
| mus_ <i>Mcl1</i> _44 | tgttcaccagatagaatgt    |
| mus_ <i>Mcl1</i> _45 | aggtgctctaccagaatgaa   |
| mus_ <i>Mcl1</i> _46 | ctttcgggaacagctgttaa   |
| mus_ <i>Mcl1</i> _47 | taacttgcagttggtcctaa   |
| mus_ <i>Mcl1</i> _48 | aggggaacatttacaacca    |

811 **Table S11. *Atoh1* probes for smFISH**

| <b><i>Atoh1</i></b> |                       |
|---------------------|-----------------------|
| mus_Atoh1_1         | gatttttttctctcctcct   |
| mus_Atoh1_2         | ttcctagtctcttctgcaag  |
| mus_Atoh1_3         | cccgaacaacaacaacaaaa  |
| mus_Atoh1_4         | cagttcaacgaaggggataa  |
| mus_Atoh1_5         | ttttacctcagcccactctt  |
| mus_Atoh1_6         | tatccaggagggacagttct  |
| mus_Atoh1_7         | tgcaaagtgggagtcagcca  |
| mus_Atoh1_8         | agaatgcagcagatactggg  |
| mus_Atoh1_9         | tctccttaccagctcaccct  |
| mus_Atoh1_10        | agctgttcccgtactttgac  |
| mus_Atoh1_11        | acaaccccacccttcagctt  |
| mus_Atoh1_12        | attcacctgtttgctggaag  |
| mus_Atoh1_13        | agcctcctttgcttctgtac  |
| mus_Atoh1_14        | ttgaaggacgggataacggt  |
| mus_Atoh1_15        | ttggacagcttcttgtcgt   |
| mus_Atoh1_16        | ttgatgtagatctgggcat   |
| mus_Atoh1_17        | attgggagctctgcagcaact |
| mus_Atoh1_18        | attttgcaggaagctgtgg   |
| mus_Atoh1_19        | tgtgccatcatcgctgtag   |
| mus_Atoh1_20        | tttgtggtgtcctcctgta   |
| mus_Atoh1_21        | ttctgtgggatctgggagat  |
| mus_Atoh1_22        | taatgagagtgggggaaaa   |
| mus_Atoh1_23        | aactggcctcatcagagtca  |
| mus_Atoh1_24        | tttcaggagctggtgcctt   |
| mus_Atoh1_25        | aagggcatttggtgtctca   |
| mus_Atoh1_26        | aaggggtgcaggatatttgt  |
| mus_Atoh1_27        | cgatcaccacagacaaaaa   |
| mus_Atoh1_28        | gaagtcaagtcgctgctaac  |
| mus_Atoh1_29        | taggaggaaggggattggaa  |
| mus_Atoh1_30        | ctacatacagaggaaggaga  |
| mus_Atoh1_31        | gatgccacgtaaaggtacat  |
| mus_Atoh1_32        | atattggcagcatggacat   |
| mus_Atoh1_33        | cagagatacagacattttagc |
| mus_Atoh1_34        | taagtgaacccagaccaga   |
| mus_Atoh1_35        | ggatgaaactccaaggtata  |
| mus_Atoh1_36        | atgtgtgagtgagcgcaaca  |
| mus_Atoh1_37        | ggggaacaacttcattgac   |
| mus_Atoh1_38        | aaagtacccaatgcgggtct  |
| mus_Atoh1_39        | caacacaatagtcctggttc  |
| mus_Atoh1_40        | cttatctgccctgcatttt   |
| mus_Atoh1_41        | ggtgtctaagctctacagat  |
| mus_Atoh1_42        | tagacacactgctggacaca  |
| mus_Atoh1_43        | atgaagtgcgtgtattctgg  |
| mus_Atoh1_44        | ttgagtttcttcaaggcggc  |
| mus_Atoh1_45        | aaaagttgctctgcattggc  |
| mus_Atoh1_46        | ccaaatgcctttgacactac  |
| mus_Atoh1_47        | gaaatgggtccaatacgc    |
| mus_Atoh1_48        | cgatctcgagtagaaaatgt  |

| <b><i>Wnt2b</i></b>   |                       |
|-----------------------|-----------------------|
| mus_ <i>Wnt2b</i> _1  | ggatggtgtcacagatcact  |
| mus_ <i>Wnt2b</i> _2  | tactgagcgcgatgatgtctg |
| mus_ <i>Wnt2b</i> _3  | atagcatagacgaacgctgc  |
| mus_ <i>Wnt2b</i> _4  | atggatggtgtcactacagc  |
| mus_ <i>Wnt2b</i> _5  | ttgtgtaagtccatgagggc  |
| mus_ <i>Wnt2b</i> _6  | agtagacaagatcagtccgg  |
| mus_ <i>Wnt2b</i> _7  | tagaagtcttgctgcagacg  |
| mus_ <i>Wnt2b</i> _8  | aacacatgatttcacaccca  |
| mus_ <i>Wnt2b</i> _9  | gtggaatttgactcacact   |
| mus_ <i>Wnt2b</i> _10 | atgtgtggacatccacagtg  |
| mus_ <i>Wnt2b</i> _11 | ttgtgcttttgagtcaagg   |
| mus_ <i>Wnt2b</i> _12 | ggattgagggtagaggaagg  |
| mus_ <i>Wnt2b</i> _13 | cgtgacagaagccatagcag  |
| mus_ <i>Wnt2b</i> _14 | taaatccatcccctatcaac  |
| mus_ <i>Wnt2b</i> _15 | ccttgacttagtgcaactca  |
| mus_ <i>Wnt2b</i> _16 | tgcaagcaaaggggaggatg  |
| mus_ <i>Wnt2b</i> _17 | gcatacccaaagaggatcag  |
| mus_ <i>Wnt2b</i> _18 | tcaaacacggaagctacctc  |
| mus_ <i>Wnt2b</i> _19 | gacaggcagttttatctctg  |
| mus_ <i>Wnt2b</i> _20 | actatggcctaagattgtct  |
| mus_ <i>Wnt2b</i> _21 | taacccatctagctatctca  |
| mus_ <i>Wnt2b</i> _22 | atgtggagccttgttcaatg  |
| mus_ <i>Wnt2b</i> _23 | ccactactttataagctgcg  |
| mus_ <i>Wnt2b</i> _24 | agagcattgtgattttcctc  |
| mus_ <i>Wnt2b</i> _25 | ggcacagagaatgtgtatct  |
| mus_ <i>Wnt2b</i> _26 | gtaagaatttgaccactgc   |
| mus_ <i>Wnt2b</i> _27 | attctctcacaatcctgttc  |
| mus_ <i>Wnt2b</i> _28 | cgaatctccggaatagtgga  |
| mus_ <i>Wnt2b</i> _29 | gctgaagatcctcaagaact  |
| mus_ <i>Wnt2b</i> _30 | aaggccttataggatgtttg  |
| mus_ <i>Wnt2b</i> _31 | tagttaacagttggacctgg  |
| mus_ <i>Wnt2b</i> _32 | ctgtttaagtcgatcgtgga  |
| mus_ <i>Wnt2b</i> _33 | cagtagcacagagagaacct  |
| mus_ <i>Wnt2b</i> _34 | ctagaccatcaaggtttgga  |
| mus_ <i>Wnt2b</i> _35 | aagatgaccattgtcgaggt  |
| mus_ <i>Wnt2b</i> _36 | tgatgacgtctatcagtcgg  |
| mus_ <i>Wnt2b</i> _37 | acagccctaaatcagaaggt  |
| mus_ <i>Wnt2b</i> _38 | gaatctagtctgtgtctgc   |
| mus_ <i>Wnt2b</i> _39 | agaattccttggtgaaagcct |
| mus_ <i>Wnt2b</i> _40 | tgctccacaaacatctgaga  |
| mus_ <i>Wnt2b</i> _41 | caaatcccctcaccaaaaga  |
| mus_ <i>Wnt2b</i> _42 | gactagctcatgttttgtgt  |
| mus_ <i>Wnt2b</i> _43 | ctactctgagaggaagacat  |
| mus_ <i>Wnt2b</i> _44 | aaactcctctctccaagag   |
| mus_ <i>Wnt2b</i> _45 | accgtaactggatgttctc   |
| mus_ <i>Wnt2b</i> _46 | aagtagatttacctcaggct  |
| mus_ <i>Wnt2b</i> _47 | gagatgtcacagatgtctgc  |
| mus_ <i>Wnt2b</i> _48 | atcagctagaatttgagacc  |



## 815 **RNASeq**

816 For RNASeq analysis, RNA was extracted from small intestinal tissue that had been frozen in  
817 RNeasy Lysis Buffer (Qiagen); taken from mice sacrificed 3 or 4 days post induction. RNA  
818 extraction and DNA digestion was performed on homogenised tissue using QIAGEN RNeasy  
819 Mini Kit (QIAGEN, #74104) according to the manufacturer's instructions. The quality of the  
820 purified RNA was tested on an Agilent 2200 TapeStation using RNA screentape. Libraries for  
821 cluster generation and RNA sequencing were prepared following an adapted method from  
822 Fisher *et al.*, 2011<sup>23</sup> using an Illumina TruSeq RNA LT Kit v2. Libraries were run on the Illumina  
823 NextSeq 500 using the High Output 75 cycles kit (2x36cycles, paired end reads, single index)  
824<sup>24</sup>. Quality control of the raw RNASeq data files was performed by fastqc  
825 (<http://www.bioinformatics.babraham.ac.uk/projects/fastqc/>) and fastq\_screen  
826 ([http://www.bioinformatics.babraham.ac.uk/projects/fastq\\_screen/](http://www.bioinformatics.babraham.ac.uk/projects/fastq_screen/)). Next, RNASeq reads  
827 were aligned to the mouse genome (GRCm38.75) using TopHat2 (tophat2), and gene level  
828 counts were determined from the resulting bam files using htseq\_count ([http://www-](http://www-huber.embl.de/users/anders/HTSeq/doc/count.html)  
829 [huber.embl.de/users/anders/HTSeq/doc/count.html](http://www-huber.embl.de/users/anders/HTSeq/doc/count.html)) with default settings. Differential  
830 expression analysis and data normalisation was performed using the R package DESeq2, with  
831 statistically significant differences in gene expression defined using a false discovery rate  
832 (FDR) of 5% or 10%. A detailed list of signaling pathways enriched in *i-Mcl1*<sup>ΔIEC</sup> mice compared  
833 with wild type control mice is shown in Table S13. A table of linked toxic pathologies associated  
834 with up-regulated genes detected in *i-Mcl1*<sup>ΔIEC</sup> mice are listed in Table S14.

835

836 GSEA analysis was performed using the GSEA v2.0 software (Broad Institute). The reference  
837 gene sets were obtained from published sources as follows; genes upregulated following APC  
838 loss<sup>25</sup> & WNT target genes commonly upregulated in human colorectal cancer<sup>26</sup>.

839

840

841 **Table S13.** Pathways enriched in *i-Mcl1*<sup>ΔIEC</sup> mice compared with wild type control mice.

| #  | Pathways Enriched in <i>i-Mcl1</i> <sup>ΔIEC</sup> mouse small intestine               | p-value   | FDR       |
|----|----------------------------------------------------------------------------------------|-----------|-----------|
| 1  | Cell cycle_Start of DNA replication in early S phase                                   | 1.249E-10 | 1.123E-07 |
| 2  | Cell cycle_Nucleocytoplasmic transport of CDK/Cyclins                                  | 2.142E-07 | 8.790E-05 |
| 3  | Apoptosis and survival_Role of IAP-proteins in apoptosis                               | 3.307E-07 | 8.790E-05 |
| 4  | Cell cycle_Regulation of G1/S transition (part 1)                                      | 4.557E-07 | 8.790E-05 |
| 5  | Cell cycle_Role of SCF complex in cell cycle regulation                                | 6.619E-07 | 8.790E-05 |
| 6  | CAR signaling via cross-talk / Human Version                                           | 6.844E-07 | 8.790E-05 |
| 7  | Cell cycle_Regulation of G1/S transition (part 2)                                      | 6.844E-07 | 8.790E-05 |
| 8  | CAR signaling via cross-talk / Rodent version                                          | 1.325E-06 | 1.489E-04 |
| 9  | Regulation of metabolism_Bile acids regulation of glucose and lipid metabolism via FXR | 1.535E-06 | 1.533E-04 |
| 10 | Development_Regulation of telomere length and cellular immortalization                 | 3.090E-06 | 2.558E-04 |
| 11 | Transcription_Epigenetic regulation of gene expression                                 | 3.345E-06 | 2.558E-04 |
| 12 | Cytoskeleton remodeling_TGF, WNT and cytoskeletal remodeling                           | 3.414E-06 | 2.558E-04 |
| 13 | Development_EGFR signaling pathway                                                     | 6.640E-06 | 4.592E-04 |
| 14 | ATP/ITP metabolism                                                                     | 8.389E-06 | 5.387E-04 |
| 15 | Cell cycle_Cell cycle (generic schema)                                                 | 1.064E-05 | 6.375E-04 |
| 16 | GTP-XTP metabolism                                                                     | 1.195E-05 | 6.581E-04 |
| 17 | Development_WNT signaling pathway. Part 2                                              | 1.244E-05 | 6.581E-04 |
| 18 | Development_Prolactin receptor signaling                                               | 1.767E-05 | 8.827E-04 |
| 19 | Cell cycle_ESR1 regulation of G1/S transition                                          | 3.214E-05 | 1.521E-03 |
| 20 | Transcription_Ligand-dependent activation of the ESR1/SP pathway                       | 4.102E-05 | 1.844E-03 |

842

843

844

845

846

847

848

849

850

851

852 **Table S14.** Toxic pathologies associated with genes enriched in *i-Mcl1<sup>ΔIEC</sup>* mice compared with  
853 wild type control mice.

| #  | Toxic pathologies in <i>i-Mcl1<sup>ΔIEC</sup></i> mouse small intestine | p-value   | FDR       |
|----|-------------------------------------------------------------------------|-----------|-----------|
| 1  | Small intestine, intestinal epithelium injury                           | 7.194E-09 | 1.743E-05 |
| 2  | Small intestine, mucosa-degeneration                                    | 6.027E-08 | 5.141E-05 |
| 3  | Jejunum, mucosa-degeneration                                            | 6.473E-08 | 5.141E-05 |
| 4  | Jejunum-degeneration                                                    | 1.156E-07 | 5.141E-05 |
| 5  | Jejunum, mucosa, intestinal epithelium injury                           | 1.252E-07 | 5.141E-05 |
| 6  | Small intestine-degeneration                                            | 1.352E-07 | 5.141E-05 |
| 7  | Intestinal epithelium injury                                            | 1.489E-07 | 5.141E-05 |
| 8  | Intestine-regeneration                                                  | 1.697E-07 | 5.141E-05 |
| 9  | Intestine-degeneration                                                  | 2.613E-07 | 7.034E-05 |
| 10 | Small intestine, mucosa injury                                          | 3.871E-07 | 9.380E-05 |
| 11 | Liver-centrilobular regeneration                                        | 5.995E-07 | 1.321E-04 |
| 12 | Jejunum, mucosa injury                                                  | 9.324E-07 | 1.883E-04 |
| 13 | Jejunum injury                                                          | 1.852E-06 | 3.045E-04 |
| 14 | Large intestine-regeneration                                            | 1.885E-06 | 3.045E-04 |
| 15 | Colon-regeneration                                                      | 1.885E-06 | 3.045E-04 |
| 16 | Small intestine, mucosa-apoptosis                                       | 2.907E-06 | 4.402E-04 |
| 17 | Colon, mucosa-regeneration                                              | 3.785E-06 | 5.095E-04 |
| 18 | Large intestine, mucosa-regeneration                                    | 3.785E-06 | 5.095E-04 |
| 19 | Small intestine injury                                                  | 4.707E-06 | 6.003E-04 |
| 20 | Small intestine-apoptosis                                               | 5.326E-06 | 6.391E-04 |

854

855

856

857

858

859

860

861

862

- 864 1. Smith K, McCoy KD, Macpherson AJ. Use of axenic animals in studying the adaptation of  
865 mammals to their commensal intestinal microbiota. *Semin Immunol* 2007;19:59-69.
- 866 2. Vick B, Weber A, Urbanik T, et al. Knockout of myeloid cell leukemia-1 induces liver damage  
867 and increases apoptosis susceptibility of murine hepatocytes. *Hepatology* 2009;49:627-36.
- 868 3. Weber A, Boger R, Vick B, et al. Hepatocyte-specific deletion of the antiapoptotic protein  
869 myeloid cell leukemia-1 triggers proliferation and hepatocarcinogenesis in mice. *Hepatology*  
870 2010;51:1226-36.
- 871 4. el Marjou F, Janssen KP, Chang BH, et al. Tissue-specific and inducible Cre-mediated  
872 recombination in the gut epithelium. *Genesis* 2004;39:186-93.
- 873 5. Opferman JT, Letai A, Beard C, et al. Development and maintenance of B and T lymphocytes  
874 requires antiapoptotic MCL-1. *Nature* 2003;426:671-6.
- 875 6. Braut V, Moore R, Kutsch S, et al. Inactivation of the beta-catenin gene by Wnt1-Cre-  
876 mediated deletion results in dramatic brain malformation and failure of craniofacial  
877 development. *Development* 2001;128:1253-64.
- 878 7. Shibata H, Toyama K, Shioya H, et al. Rapid colorectal adenoma formation initiated by  
879 conditional targeting of the Apc gene. *Science* 1997;278:120-3.
- 880 8. Propheter DC, Chara AL, Harris TA, et al. Resistin-like molecule beta is a bactericidal protein  
881 that promotes spatial segregation of the microbiota and the colonic epithelium. *Proc Natl Acad*  
882 *Sci U S A* 2017;114:11027-11033.
- 883 9. Packey CD, Shanahan MT, Manick S, et al. Molecular detection of bacterial contamination in  
884 gnotobiotic rodent units. *Gut Microbes* 2013;4:361-70.
- 885 10. Erben U, Loddenkemper C, Doerfel K, et al. A guide to histomorphological evaluation of  
886 intestinal inflammation in mouse models. *Int J Clin Exp Pathol* 2014;7:4557-76.
- 887 11. Boivin GP, Washington K, Yang K, et al. Pathology of mouse models of intestinal cancer:  
888 consensus report and recommendations. *Gastroenterology* 2003;124:762-77.
- 889 12. Huang H, Ushijima T, Nagao M, et al. Beta-catenin mutations in liver tumors induced by 2-  
890 amino-3,4-dimethylimidazo[4,5-f]quinoline in CDF1 mice. *Cancer Lett* 2003;198:29-35.
- 891 13. Wolf MJ, Adili A, Piotrowitz K, et al. Metabolic activation of intrahepatic CD8+ T cells and NKT  
892 cells causes nonalcoholic steatohepatitis and liver cancer via cross-talk with hepatocytes.  
893 *Cancer Cell* 2014;26:549-64.
- 894 14. Fred T, Bosman FC, Ralph H, Hruban, Neil D. Theise. Tumours of the colon and rectum.  
895 WHO Classification of Tumours of the Digestive System. Volume 4th Edition: WHO Press,  
896 2010:140-142.
- 897 15. Li H, Durbin R. Fast and accurate short read alignment with Burrows-Wheeler transform.  
898 *Bioinformatics* 2009;25:1754-60.
- 899 16. DePristo MA, Banks E, Poplin R, et al. A framework for variation discovery and genotyping  
900 using next-generation DNA sequencing data. *Nat Genet* 2011;43:491-8.
- 901 17. Cingolani P, Platts A, Wang le L, et al. A program for annotating and predicting the effects of  
902 single nucleotide polymorphisms, SnpEff: SNPs in the genome of *Drosophila melanogaster*  
903 strain w1118; iso-2; iso-3. *Fly (Austin)* 2012;6:80-92.
- 904 18. Fairfield H, Srivastava A, Ananda G, et al. Exome sequencing reveals pathogenic mutations in  
905 91 strains of mice with Mendelian disorders. *Genome Res* 2015;25:948-57.
- 906 19. UniProt: a hub for protein information. *Nucleic Acids Res* 2015;43:D204-12.
- 907 20. Forbes SA, Beare D, Gunasekaran P, et al. COSMIC: exploring the world's knowledge of  
908 somatic mutations in human cancer. *Nucleic Acids Res* 2015;43:D805-11.
- 909 21. Moor AE, Harnik Y, Ben-Moshe S, et al. Spatial Reconstruction of Single Enterocytes  
910 Uncovers Broad Zonation along the Intestinal Villus Axis. *Cell* 2018;175:1156-1167.e15.
- 911 22. Bahar Halpern K, Itzkovitz S. Single molecule approaches for quantifying transcription and  
912 degradation rates in intact mammalian tissues. *Methods* 2016;98:134-142.
- 913 23. Fisher S, Barry A, Abreu J, et al. A scalable, fully automated process for construction of  
914 sequence-ready human exome targeted capture libraries. *Genome Biol* 2011;12:R1.
- 915 24. Rath N, Morton JP, Julian L, et al. ROCK signaling promotes collagen remodeling to facilitate  
916 invasive pancreatic ductal adenocarcinoma tumor cell growth. *EMBO Mol Med* 2017;9:198-  
917 218.
- 918 25. Sansom OJ, Reed KR, Hayes AJ, et al. Loss of Apc in vivo immediately perturbs Wnt  
919 signaling, differentiation, and migration. *Genes Dev* 2004;18:1385-90.
- 920 26. Van der Flier LG, Sabates-Bellver J, Oving I, et al. The Intestinal Wnt/TCF Signature.  
921 *Gastroenterology* 2007;132:628-32.
